# Supplementary material for: SLC38A2 provides proline to fulfill unique synthetic demands arising during osteoblast differentiation and bone formation
Source: eLife journal article supplement (doi:10.7554/elife.76963), 2022-03-09
Supplement: supp [file elife-76963-supp-v2.zip]

## Sheet: Sheet1
GeneID	GeneName	IsCoding	log2FoldChange	stat	pvalue	padj	Control_Dif_1	Control_Dif_2	Control_Dif_3	Control_Normal_1	Control_Normal_2	Control_Normal_3
ENSMUSG00000040152	Thbs1	TRUE	-0.658258	-15.718	1.13854e-55	7.9123e-54	688863	681452	763927	1.11428e+06	1.09901e+06	1.15494e+06
ENSMUSG00000026193	Fn1	TRUE	-1.29553	-19.5722	2.66904e-85	3.13008e-83	453597	406273	499607	1.0343e+06	1.10732e+06	1.19547e+06
ENSMUSG00000001506	Col1a1	TRUE	0.863331	21.7167	1.4265e-104	2.14132e-102	841493	819223	894813	457913	468432	478388
ENSMUSG00000029661	Col1a2	TRUE	0.836481	22.3407	1.48565e-110	2.47789e-108	608303	583766	630101	332115	340623	347695
ENSMUSG00000018593	Sparc	TRUE	-0.0208892	-0.605176	0.545062	0.67748	215220	222396	223200	220534	225401	224518
ENSMUSG00000022483	Col2a1	TRUE	-0.741746	-17.5756	3.78981e-69	3.49011e-67	106539	117069	117714	187881	196508	186365
ENSMUSG00000032332	Col12a1	TRUE	0.135317	1.32674	0.184596	0.30221	170481	142502	183714	142868	148509	160854
ENSMUSG00000097805	AC100734.1	FALSE	6.94223	2.3901	0.0168438	0.0421167	5.88922	2.26721	5.24459	0	0	0
ENSMUSG00000052353	9930013L23Rik	TRUE	-0.740865	-19.3972	8.14487e-84	9.26233e-82	72755.4	77698.5	80482.6	129078	127186	129678
ENSMUSG00000027966	Col11a1	TRUE	-0.529943	-10.9668	5.52027e-28	1.60902e-26	83911.6	76369.9	86791.8	116325	121390	119040
ENSMUSG00000026043	Col3a1	TRUE	0.981762	27.7059	5.92993e-169	2.22535e-166	222342	209147	224547	106832	111647	113714
ENSMUSG00000026042	Col5a2	TRUE	0.00972035	0.306274	0.759396	0.846085	92697.3	89239.7	94875.5	89521.8	93189.8	92249.1
ENSMUSG00000026837	Col5a1	TRUE	-0.183493	-4.2155	2.4922e-05	0.000117311	82586.5	75703.3	84690.5	88748.3	93606.6	93590.6
ENSMUSG00000024529	Lox	TRUE	-0.130572	-3.32151	0.000895315	0.00317046	76265.4	71395.6	79514.1	81507.8	82674.4	84525.8
ENSMUSG00000023885	Thbs2	TRUE	0.277148	6.91972	4.52522e-12	4.87289e-11	102176	92481.8	101911	79489.5	80316.2	84938
ENSMUSG00000039323	Igfbp2	TRUE	-0.295496	-6.15712	7.40819e-10	6.37274e-09	56846.7	62172.6	62200.8	76128.5	74008.2	72276.2
ENSMUSG00000031375	Bgn	TRUE	-0.135189	-3.32036	0.000899019	0.00318207	73346.3	73191.3	75054.4	75866	81149.7	86344
ENSMUSG00000022892	App	TRUE	-0.571253	-17.7463	1.84054e-70	1.73763e-68	49600	49094.2	51926.7	73840.2	73675.2	76293.6
ENSMUSG00000041559	Fmod	TRUE	0.491442	13.7729	3.71088e-43	1.7969e-41	101304	103922	107489	72877.3	73355.2	76208.9
ENSMUSG00000000184	Ccnd2	TRUE	-0.529071	-16.7263	8.43861e-63	7.15661e-61	48964	49360.6	51869.9	70539.4	72809.1	73390.9
ENSMUSG00000032216	Nedd4	TRUE	-0.117878	-2.82325	0.00475393	0.0140863	66501.1	60507.3	66605.4	68629.8	69325.4	72153.2
ENSMUSG00000070047	Fat1	TRUE	-0.521	-3.76555	0.000166186	0.000681858	47313	38269.4	54868	61571.1	66272.3	73700.3
ENSMUSG00000031328	Flna	TRUE	0.0919458	1.90455	0.0568386	0.118271	64215.1	62045.6	70073.8	61129	60956	62136
ENSMUSG00000040249	Lrp1	TRUE	-0.390114	-2.99413	0.00275229	0.00866318	53369.1	43298.1	59402	61096.7	67894.7	75540.7
ENSMUSG00000017493	Igfbp4	TRUE	0.647951	19.5114	8.78009e-85	1.02169e-82	91932.7	94800.1	94344.9	60888	59716.9	58775.8
ENSMUSG00000070436	Serpinh1	TRUE	-0.050295	-1.32619	0.184776	0.302407	56687.7	57038.5	59056.7	58067.1	61313.2	59532.7
ENSMUSG00000020473	Aebp1	TRUE	-0.109191	-3.23317	0.00122423	0.00419374	51304.9	52456.5	54778	56076.7	56396.9	58536.9
ENSMUSG00000034994	Eef2	TRUE	-0.455377	-14.788	1.75206e-49	1.01155e-47	40714.1	40757.7	40877.2	54744.8	55608	57404.1
ENSMUSG00000019997	Ctgf	TRUE	-0.750519	-5.42666	5.74192e-08	3.97198e-07	24683.7	38178.7	36132.6	54382.3	56316.9	55848
ENSMUSG00000017466	Timp2	TRUE	0.204868	6.14356	8.069e-10	6.89771e-09	62234.3	64044.2	65611.6	53905.7	55274.1	57308.4
ENSMUSG00000028763	Hspg2	TRUE	-0.245245	-1.89965	0.0574789	0.119385	48556.6	39728.3	54576.1	50934.2	56749.4	61652.3
ENSMUSG00000068196	Col8a1	TRUE	0.403465	9.07729	1.11307e-19	2.05514e-18	69897.2	66242.3	71954.9	49956.2	54194.1	53179.1
ENSMUSG00000022816	Fstl1	TRUE	0.392772	10.5947	3.15194e-26	8.5404e-25	67712.3	62530.8	63270.7	48015.4	49441.5	49935.8
ENSMUSG00000026728	Vim	TRUE	0.146907	4.44611	8.74394e-06	4.42086e-05	52274.7	53712.5	54074.3	46864.2	48471.2	49227.3
ENSMUSG00000022443	Myh9	TRUE	-0.23224	-4.52347	6.08343e-06	3.15217e-05	38832.5	39458.6	44043.2	46093.9	46962.4	50652.4
ENSMUSG00000069833	Ahnak	TRUE	-0.0725469	-0.631217	0.527899	0.662732	45842.7	41051.3	53552.5	46073.4	49713.1	51906.2
ENSMUSG00000029580	Actb	TRUE	0.267405	5.94116	2.83017e-09	2.28039e-08	49225	56119.2	55056.8	44900.8	43740	44621.3
ENSMUSG00000029761	Cald1	TRUE	-0.203306	-7.01182	2.35234e-12	2.60214e-11	37121.7	39288.5	38331.8	43098.7	44334.4	44662.6
ENSMUSG00000031673	Cdh11	TRUE	0.318134	7.75876	8.57619e-15	1.16927e-13	53705.8	52694.5	54428.3	42002.4	42620.9	44380.4
ENSMUSG00000069662	Marcks	TRUE	0.384278	9.9404	2.77715e-23	6.33553e-22	54043.4	49268.8	52415.3	39816.3	40933.5	38567.1
ENSMUSG00000034101	Ctnnd1	TRUE	-0.448728	-13.1641	1.41123e-39	6.17607e-38	28653	28252.9	30201.8	38924.4	39376.2	40599.9
ENSMUSG00000029767	Calu	TRUE	-0.116034	-4.26116	2.03372e-05	9.73476e-05	37020.6	36790	36470.9	38734	40126.9	40650.3
ENSMUSG00000025809	Itgb1	TRUE	-0.229209	-7.44722	9.53243e-14	1.18355e-12	32661.6	33322.3	34525.1	38512.3	39483.2	39824.9
ENSMUSG00000048583	Igf2	TRUE	0.235963	5.24506	1.56233e-07	1.02188e-06	47416.1	45288.7	46005.5	38497.3	40066.5	39217.1
ENSMUSG00000027832	Ptx3	TRUE	-1.59086	-27.353	9.95377e-165	3.55753e-162	14111.6	11344	13079.1	38103.5	40092.5	37903.9
ENSMUSG00000031740	Mmp2	TRUE	0.43759	15.8885	7.61113e-57	5.46654e-55	50789.6	51431.7	52284.2	37681.8	37453.4	38950
ENSMUSG00000001119	Col6a1	TRUE	0.800314	23.6453	1.31914e-123	2.71256e-121	66328.3	64005.7	68106.2	36541.4	38445.1	38964.2
ENSMUSG00000007891	Ctsd	TRUE	-0.384801	-11.1283	9.13788e-29	2.75439e-27	27138.5	28621.3	27876.7	35801.2	35806	37589.4
ENSMUSG00000025278	Flnb	TRUE	-0.589636	-10.2984	7.16567e-25	1.82003e-23	24607.1	23009.9	27170.5	35624.8	37147.4	39785.6
ENSMUSG00000021390	Ogn	TRUE	0.071768	1.34287	0.179313	0.295333	40248.9	33552.5	36940.3	34869.5	35003.2	35501.1
ENSMUSG00000016918	Sulf1	TRUE	-0.470786	-11.02	3.05972e-28	8.98814e-27	24202.7	26580.8	26324.3	34100.3	35779	36976.6
ENSMUSG00000005610	Eif4g2	TRUE	-0.166549	-5.79933	6.6581e-09	5.13327e-08	29362.7	28803.8	29969.3	32572.6	32786.4	33571.1
ENSMUSG00000002265	Peg3	TRUE	-0.443571	-4.67525	2.93595e-06	1.59391e-05	24277.3	20872	24567.4	31513.9	31052.4	32250.8
ENSMUSG00000020044	Timp3	TRUE	-1.09862	-19.855	9.98506e-88	1.21858e-85	14955.7	15414.8	16067.7	30135.7	34362.2	34949.8
ENSMUSG00000020176	Grb10	TRUE	-0.197617	-4.43873	9.04904e-06	4.55822e-05	27781.4	24678.6	27180.1	29726.9	30632.9	30980.8
ENSMUSG00000028173	Wls	TRUE	-0.796341	-27.9594	5.06667e-172	1.95015e-169	17364.4	16975.7	16983.7	29516.1	29961.2	29655.5
ENSMUSG00000034088	Hdlbp	TRUE	-0.0195368	-0.544022	0.586426	0.711913	28473.4	28233.6	29768.3	28835	28837.5	29989.1
ENSMUSG00000028364	Tnc	TRUE	-0.176986	-1.87561	0.0607086	0.124699	27109.1	24769.3	29723.7	28768.3	30638.5	32849.4
ENSMUSG00000035783	Acta2	TRUE	0.662143	14.355	9.91331e-47	5.25826e-45	43001.1	45904.2	47021.2	28303.6	29111.9	28481.3
ENSMUSG00000025130	P4hb	TRUE	-0.275939	-8.63324	5.96362e-18	1.00134e-16	24221.4	23704.8	24613.7	28288.5	29332.4	30213.9
ENSMUSG00000027523	Gnas	TRUE	-0.155428	-4.78005	1.75251e-06	9.82705e-06	25477.7	25635.4	26102.3	28212.1	28303.6	29486.2
ENSMUSG00000097124	AC115727.1	FALSE	3.425	12.9394	2.69783e-38	1.1187e-36	208.086	173.442	135.485	17.2137	16.7444	14.1101
ENSMUSG00000020695	Mrc2	TRUE	-0.269105	-8.17458	2.96891e-16	4.45663e-15	22888.5	23678.8	24595.4	28022.8	28670.1	29066.9
ENSMUSG00000064370	mt-Cytb	TRUE	0.116228	1.89325	0.0583249	0.120718	35904.6	29674.4	31212.3	27806.5	31970.6	29521.4
ENSMUSG00000023944	Hsp90ab1	TRUE	-0.268434	-7.65401	1.94811e-14	2.56069e-13	22302.5	24145.8	23218.7	27402	27922.2	28580.1
ENSMUSG00000029781	Fkbp9	TRUE	0.199252	7.02969	2.07e-12	2.30681e-11	32274.9	31814.6	32529.6	27353.6	28058	28745.4
ENSMUSG00000028370	Pappa	TRUE	-0.405429	-5.81927	5.91063e-09	4.58051e-08	20463.1	17556.2	22211.7	27166.4	26368.7	26251.9
ENSMUSG00000086854	Gm13781	FALSE	3.33169	2.9584	0.00309237	0.0095829	7.85229	3.40082	8.74098	0	0	2.01573
ENSMUSG00000026185	Igfbp5	TRUE	1.4723	12.092	1.16416e-33	4.16077e-32	73050.9	65758.2	74018.6	26847.9	24168.6	25689.5
ENSMUSG00000003814	Calr	TRUE	-0.0203673	-0.599365	0.54893	0.68099	26941.2	27160.1	26936.2	26631.7	27636.6	27916.9
ENSMUSG00000020315	Sptbn1	TRUE	-0.169052	-3.08284	0.00205035	0.00667196	25296.2	21947.7	25707.2	26555.3	27173.3	28301.9
ENSMUSG00000020241	Col6a2	TRUE	1.11859	31.9382	7.88132e-224	5.37757e-221	59635.2	58750.3	61604.7	26373.5	28308.2	28209.2
ENSMUSG00000026864	Hspa5	TRUE	-0.608191	-15.8859	7.93907e-57	5.67493e-55	16648.8	17517.6	18305.4	26230.4	26418.9	27342.4
ENSMUSG00000037742	Eef1a1	TRUE	-0.397491	-10.4068	2.30854e-25	6.03719e-24	20940.1	19859.6	20433.8	25950.7	27585.4	27122.7
ENSMUSG00000064351	mt-Co1	TRUE	0.210156	3.46216	0.000535858	0.00198623	34598.2	28880.9	31642.4	25694.6	28507.3	28026.8
ENSMUSG00000022665	Ccdc80	TRUE	0.20035	5.62321	1.8744e-08	1.37771e-07	28218.2	28647.4	28971.1	25189	24684.9	24835.9
ENSMUSG00000064367	mt-Nd5	TRUE	-0.127388	-1.86587	0.06206	0.126849	25339.4	20867.4	23884.7	24887.7	28019.8	23657.7
ENSMUSG00000000753	Serpinf1	TRUE	-0.367146	-11.2408	2.56926e-29	7.90312e-28	19025.1	19880	19511.6	24675.8	24790	25875
ENSMUSG00000020048	Hsp90b1	TRUE	-0.370087	-9.7211	2.45119e-22	5.28662e-21	19765.2	19772.4	19647.1	24674.7	25411.4	26403.1
ENSMUSG00000004207	Psap	TRUE	-0.222905	-7.69338	1.43296e-14	1.91031e-13	21241.4	21250.6	21685.5	24639.2	24693.3	25572.6
ENSMUSG00000027248	Pdia3	TRUE	-0.139228	-4.22123	2.42975e-05	0.000114761	22075.7	21759.6	22001.9	23299.8	24285.8	24920.5
ENSMUSG00000026674	Ddr2	TRUE	-0.341758	-7.36686	1.7469e-13	2.13714e-12	18656.1	17458.7	19090.3	23137.3	23487.7	23345.2
ENSMUSG00000035258	Abi3bp	TRUE	0.0937126	1.83152	0.0670225	0.135116	25514.1	23297.9	26054.2	22793	22811.4	24560.7
ENSMUSG00000022206	Npr3	TRUE	-0.384007	-6.89476	5.39559e-12	5.76875e-11	17656.9	15831.9	18621.8	22726.3	22377	22911.9
ENSMUSG00000026586	Prrx1	TRUE	0.324971	8.14012	3.94884e-16	5.89224e-15	29134	25955	28514.8	22438	22364	21949.3
ENSMUSG00000086067	Gm16183	FALSE	3.10287	2.40121	0.0163411	0.0410127	7.85229	6.80163	2.62229	0	0.930242	1.00787
ENSMUSG00000018707	Dync1h1	TRUE	-0.430878	-3.68015	0.000233094	0.000930332	17764.8	14948.9	19960	22274.5	23336.1	25401.3
ENSMUSG00000084890	A830036E02Rik	FALSE	3.0964	3.09481	0.00196941	0.0064323	5.88922	11.3361	8.74098	2.15171	0.930242	0
ENSMUSG00000023830	Igf2r	TRUE	-0.86108	-14.7718	2.2277e-49	1.28122e-47	12691.3	11701.1	13896.4	22208.9	22843	24511.3
ENSMUSG00000025203	Scd2	TRUE	-0.0231682	-0.579638	0.562159	0.691676	22218.1	20835.7	22335.8	22134.6	22317.4	22003.8
ENSMUSG00000070348	Ccnd1	TRUE	0.239435	4.39935	1.08577e-05	5.41298e-05	24170.3	29031.6	28201.9	22037.8	23864.4	23047.9
ENSMUSG00000024661	Fth1	TRUE	0.0345754	1.07839	0.280862	0.418007	22298.6	23228.7	22495.8	21795.7	22217.9	22390.8
ENSMUSG00000020585	Laptm4a	TRUE	0.0409068	1.21011	0.226238	0.354643	22970.9	21882	22140	21793.6	22110.9	21216.6
ENSMUSG00000031503	Col4a2	TRUE	0.460022	10.9901	4.26314e-28	1.24745e-26	31102	31392.9	33017.3	21785	23547.2	24102.1
ENSMUSG00000030096	Slc6a6	TRUE	0.143926	2.83955	0.0045177	0.0134663	24191	21031.8	23324.4	21405.2	20409.5	20232.9
ENSMUSG00000023036	Pcdhgc4	TRUE	0.0341293	1.02107	0.307223	0.448002	22874.7	22037.3	23135.6	21363.2	22261.6	22836.3
ENSMUSG00000047126	Cltc	TRUE	-0.288089	-6.23768	4.441e-10	3.9191e-09	17461.5	15977	18030	21225.5	20371.4	21262
ENSMUSG00000030772	Dkk3	TRUE	0.03166	0.996801	0.318861	0.459747	20787	20283.6	21253.7	20793	20352.8	19835.8
ENSMUSG00000031502	Col4a1	TRUE	0.643743	12.9619	2.01294e-38	8.4403e-37	33784.5	34869.7	37209.5	20761.8	22943.5	24051.7
ENSMUSG00000073530	Pappa2	TRUE	0.628965	11.3132	1.12938e-29	3.54669e-28	33686.3	31076.7	35889.6	20696.2	21047.7	23347.3
ENSMUSG00000032366	Tpm1	TRUE	0.514966	13.9695	2.39322e-44	1.19351e-42	30782	28644	30160.8	20652.1	21050.5	20994.9
ENSMUSG00000024740	Ddb1	TRUE	-0.150711	-4.71668	2.3973e-06	1.31768e-05	18650.2	18163.8	19001.1	20548.8	20377	21045.3
ENSMUSG00000004044	Ptrf	TRUE	0.194591	6.30442	2.89272e-10	2.60016e-09	23906.3	23412.4	23760.6	20527.3	21354.6	20226.9
ENSMUSG00000020368	Canx	TRUE	-0.537518	-15.6941	1.66091e-55	1.14894e-53	14651.4	14446.7	14515.3	20062.5	21344.4	21892.9
ENSMUSG00000031996	Aplp2	TRUE	-0.20877	-5.28613	1.24928e-07	8.27213e-07	16686.1	16683.3	17060.6	19596.7	18767.6	19923.5
ENSMUSG00000006932	Ctnnb1	TRUE	-0.0702816	-2.47068	0.0134857	0.0347348	18839.6	18796.3	18985.4	19390.1	19755.6	20302.5
ENSMUSG00000020326	Ccng1	TRUE	-0.304308	-9.49393	2.22476e-21	4.59365e-20	16347.5	15482.8	15762.6	19251.3	19560.2	19960.8
ENSMUSG00000001911	Nfix	TRUE	0.150246	4.59077	4.41612e-06	2.3317e-05	21775.4	20533	22009.8	19000.7	19641.1	19322.8
ENSMUSG00000021823	Vcl	TRUE	0.232427	5.91686	3.28155e-09	2.61323e-08	21905.9	22951	23309.6	18977	18990	20057.6
ENSMUSG00000036606	Plxnb2	TRUE	-0.239686	-6.52079	6.99371e-11	6.71244e-10	16194.4	15705	16787.9	18885.5	18745.3	19867.1
ENSMUSG00000016995	Matn4	TRUE	0.917813	13.9966	1.63419e-44	8.20427e-43	34983.9	34745	34340.7	18643.5	18256	18186
ENSMUSG00000028465	Tln1	TRUE	-0.0341445	-0.7215	0.470602	0.611091	17354.6	17610.6	19351.7	18300.3	18268.1	19056.8
ENSMUSG00000025151	Maged1	TRUE	0.0790258	2.54405	0.0109574	0.0291015	19060.5	19028.7	19000.3	18211	17910	17926.9
ENSMUSG00000027204	Fbn1	TRUE	-0.285504	-2.04064	0.0412867	0.0908198	18497.1	13151	17570.2	17909.7	19885.8	22196.3
ENSMUSG00000021939	Ctsb	TRUE	-0.136527	-3.04065	0.00236069	0.00756862	14900.7	15743.5	15260	17892.5	15642	16929.2
ENSMUSG00000064341	mt-Nd1	TRUE	0.156396	2.58195	0.00982438	0.0265103	21867.7	19317.8	18055.4	17612.8	18997.4	16540.1
ENSMUSG00000039405	Prss23	TRUE	0.51048	14.323	1.57298e-46	8.31409e-45	24521.7	24193.4	25285	17365.4	17364.8	17221.4
ENSMUSG00000034205	Loxl2	TRUE	-0.377165	-7.6129	2.68018e-14	3.48029e-13	12857.1	13865.1	14094.8	17309.4	17837.4	17865.5
ENSMUSG00000022261	Sdc2	TRUE	-0.606779	-19.3216	3.53663e-83	3.96182e-81	11690.1	11287.3	11926.2	17301.9	17768.6	18095.3
ENSMUSG00000029718	Pcolce	TRUE	0.514317	16.3235	6.71296e-60	5.24835e-58	24446.2	25130.9	25443.3	17085.6	17772.3	17662.9
ENSMUSG00000032231	Anxa2	TRUE	0.0626923	1.48656	0.137131	0.238969	17927.8	19078.6	18193.5	16768.3	18163.9	17910.8
ENSMUSG00000032399	Rpl4	TRUE	-0.238923	-5.89171	3.8223e-09	3.023e-08	15075.4	14848	14985.5	16679	17971.4	18344.2
ENSMUSG00000053617	Sh3pxd2a	TRUE	0.314424	6.0183	1.76255e-09	1.45772e-08	21851	18658	21454.7	16668.2	16331.3	16838.4
ENSMUSG00000031447	Lamp1	TRUE	-0.137666	-4.65637	3.21831e-06	1.73965e-05	15273.7	15254.9	15625.4	16576.8	17022.5	17178.1
ENSMUSG00000032340	Neo1	TRUE	-0.554842	-11.6475	2.36387e-31	7.7987e-30	11385.8	10315.8	11450.7	16567.1	16066.2	16081.5
ENSMUSG00000036446	Lum	TRUE	2.04291	56.9927	0	0	66720	65709.5	66762.7	16560.6	16257.8	15522.2
ENSMUSG00000029304	Spp1	TRUE	0.487442	2.583	0.00979439	0.0264401	16013.8	30775.1	23968.6	16555.2	17172.3	16741.7
ENSMUSG00000005397	Nid1	TRUE	0.769533	13.6093	3.5273e-42	1.64436e-40	30340.3	26223.7	30116.2	16540.2	16298.8	18013.6
ENSMUSG00000006800	Sulf2	TRUE	0.335958	7.82731	4.98407e-15	6.90821e-14	21633.1	20003.6	21711.7	16539.1	16129.5	17527.8
ENSMUSG00000045962	Wnk1	TRUE	-0.101787	-2.10361	0.0354129	0.079812	15848.9	14408.1	16381.5	16382	16643	17033
ENSMUSG00000021388	Aspn	TRUE	0.463953	7.8406	4.48414e-15	6.22678e-14	24856.4	21564.6	22982.7	16254	16671.8	17393.8
ENSMUSG00000048578	Mlec	TRUE	0.0407648	1.40297	0.160627	0.270796	17403.6	16776.2	17187.4	16228.2	16742.5	16967.4
ENSMUSG00000022565	Plec	TRUE	-0.119576	-2.12676	0.03344	0.0760097	14575.8	14758.4	17085.1	16049.6	16961.1	17427
ENSMUSG00000001525	Tubb5	TRUE	-0.0562298	-1.71453	0.0864318	0.166346	15225.6	15884.1	15795.8	16000.1	16246.7	16520
ENSMUSG00000028369	Svep1	TRUE	0.258786	2.04317	0.041036	0.0904008	21824.5	16719.6	22954.7	15811.8	16921.1	18669.7
ENSMUSG00000027750	Postn	TRUE	0.718372	10.6366	2.01331e-26	5.49487e-25	27981.6	25769.1	27971.1	15745.1	16309.9	17615.5
ENSMUSG00000079505	Gm11131	FALSE	2.69037	2.4168	0.0156576	0.0395485	4.90768	5.66803	8.74098	2.15171	0.930242	0
ENSMUSG00000039286	Fndc3b	TRUE	-0.463394	-9.59725	8.21085e-22	1.73841e-20	11964	10714.8	12469.9	15737.6	15931.3	16809.2
ENSMUSG00000045983	Eif4g1	TRUE	0.0177809	0.471882	0.637011	0.753378	15330.6	16098.3	16793.2	15673	15863.4	16098.7
ENSMUSG00000048126	Col6a3	TRUE	1.09263	10.0563	8.61673e-24	2.05637e-22	36397.3	30370.4	39300.3	15618.2	16587.2	17531.9
ENSMUSG00000053931	Cnn3	TRUE	0.0180429	0.561047	0.574765	0.702495	15623.1	16037.1	16287.9	15372.9	16108.1	15868.9
ENSMUSG00000028780	Sema3c	TRUE	-0.246534	-6.60283	4.03388e-11	3.96546e-10	13183	12303	13411.3	15264.2	15072.7	15823.5
ENSMUSG00000027828	Ssr3	TRUE	-0.130978	-4.29253	1.76651e-05	8.54014e-05	14178.3	13581.7	13649.9	15238.4	15139.7	14969.9
ENSMUSG00000052188	Gm14964	FALSE	2.63357	3.27614	0.00105237	0.00366863	10.7969	13.6033	6.99279	2.15171	1.86048	1.00787
ENSMUSG00000022108	Itm2b	TRUE	0.236234	7.12072	1.07368e-12	1.22562e-11	17999.4	18043.6	18199.6	15213.7	15302.5	15534.3
ENSMUSG00000027447	Cst3	TRUE	0.0772178	2.25049	0.0244176	0.0580691	15955.9	15685.7	15988.1	15169.5	15448.5	14530.4
ENSMUSG00000021910	Nisch	TRUE	-0.0268989	-0.801688	0.422733	0.565264	14648.5	14615.6	14800.2	15128.7	14723.9	15045.4
ENSMUSG00000030849	Fgfr2	TRUE	-0.0902658	-1.70805	0.0876267	0.168076	14057.6	13178.2	14567.7	15079.2	14730.4	14700.8
ENSMUSG00000097063	RP23-71K9.4	FALSE	2.60195	3.25069	0.00115125	0.00396613	8.83383	14.7369	6.99279	2.15171	2.79073	0
ENSMUSG00000032440	Tgfbr2	TRUE	0.00344978	0.105593	0.915905	0.950872	15425.8	14991.9	15648.1	15065.2	15152.7	15744.9
ENSMUSG00000056174	Col8a2	TRUE	0.31292	6.42179	1.34685e-10	1.25575e-09	19016.3	18782.7	18878.8	15045.8	16149.9	14427.6
ENSMUSG00000032479	Map4	TRUE	-0.203578	-5.51165	3.55481e-08	2.53498e-07	13488.3	12518.4	13423.5	15002.8	14938.8	15475.8
ENSMUSG00000064080	Fbln2	TRUE	-0.74953	-11.2141	3.47789e-29	1.06327e-27	10690.9	9462.21	9905.28	14839.3	17096.9	18600.2
ENSMUSG00000031451	Gas6	TRUE	1.17066	32.5039	9.38422e-232	7.41403e-229	34670.8	32524.3	34525.1	14774.7	14927.6	15486.9
ENSMUSG00000026553	Copa	TRUE	-0.118344	-3.32453	0.000885692	0.00314157	14105.7	13448	14200.6	14716.6	15033.6	15580.6
ENSMUSG00000021806	Nid2	TRUE	0.229989	4.23838	2.25137e-05	0.000106947	18267.4	15253.8	17586.9	14673.6	13923.9	14989
ENSMUSG00000041577	Prelp	TRUE	0.596373	14.163	1.55133e-45	7.97499e-44	24033.9	22488.5	24022	14654.2	15561.1	16445.4
ENSMUSG00000034488	Edil3	TRUE	-0.525288	-12.6994	5.95505e-37	2.37112e-35	10586.9	9608.44	10687.6	14605.8	14985.3	14871.1
ENSMUSG00000056427	Slit3	TRUE	-0.0869033	-1.35823	0.17439	0.289	14475.7	12838.1	15462.8	14601.5	14786.2	16053.3
ENSMUSG00000016534	Lamp2	TRUE	-0.126275	-3.73478	0.000187881	0.000764718	13761.1	12763.3	13446.3	14536.9	14418.8	14681.6
ENSMUSG00000027996	Sfrp2	TRUE	1.18621	10.9031	1.11337e-27	3.22019e-26	35928.2	29744.7	35066.2	14529.4	14079.2	15663.3
ENSMUSG00000031239	Itm2a	TRUE	0.0862921	2.74223	0.00610239	0.017525	16009.8	15364.9	15366.6	14498.2	14893.2	14634.2
ENSMUSG00000021756	Il6st	TRUE	-0.366716	-7.97275	1.55181e-15	2.22273e-14	12288.8	10790.8	11685.8	14354	14829	15652.2
ENSMUSG00000062184	Hs6st2	TRUE	-0.539566	-14.1484	1.91017e-45	9.78617e-44	9994.99	9890.71	10434.1	14339	14694.1	15045.4
ENSMUSG00000024393	Prrc2a	TRUE	-0.026239	-0.744132	0.456797	0.597922	14240.1	13767.6	14767.9	14313.2	14602.9	14653.4
ENSMUSG00000057738	Sptan1	TRUE	-0.319017	-5.63133	1.78829e-08	1.31977e-07	12168.1	11134.3	12878.1	14299.2	14897.8	15946.5
ENSMUSG00000031561	Tenm3	TRUE	-0.285056	-4.57684	4.72049e-06	2.48106e-05	12556.8	10976.7	13441	14290.6	14884.8	15887
ENSMUSG00000029840	Mtpn	TRUE	-0.213111	-6.66337	2.6762e-11	2.68712e-10	12191.7	11684.1	12378.1	13986.1	14149	13900.5
ENSMUSG00000038615	Nfe2l1	TRUE	-0.573095	-17.7548	1.58098e-70	1.50204e-68	9450.24	9249.09	9726.97	13976.4	14103.4	14222
ENSMUSG00000022533	Atp13a3	TRUE	-0.0248663	-0.655732	0.511997	0.648518	13427.4	13110.2	14211.1	13920.5	13750.8	13796.7
ENSMUSG00000003316	Glg1	TRUE	-0.442635	-9.7167	2.55948e-22	5.50435e-21	10656.5	9463.34	10667.5	13739.7	13783.4	14333.9
ENSMUSG00000027087	Itgav	TRUE	-0.0734295	-1.5215	0.128135	0.22658	12967.1	12841.5	14589.6	13733.3	14213.2	14569.7
ENSMUSG00000017707	Serinc3	TRUE	-0.239783	-8.28375	1.19355e-16	1.83758e-15	11543.9	11593.4	11749.6	13633.2	13708.1	13856.2
ENSMUSG00000033149	Phldb2	TRUE	-0.369816	-7.26139	3.83135e-13	4.55724e-12	11131.6	9376.05	10508.4	13622.5	13143.4	13325
ENSMUSG00000037852	Cpe	TRUE	-0.363411	-9.96679	2.13006e-23	4.94195e-22	10322.8	11098	10782.9	13584.8	13785.3	14051.7
ENSMUSG00000046743	Fat4	TRUE	-0.0381806	-0.223976	0.822776	0.888284	15361	10458.6	16288.8	13523.5	14277.4	15439.5
ENSMUSG00000027422	Rrbp1	TRUE	-0.0655238	-1.89323	0.0583274	0.120718	13146.7	13230.3	13796.8	13508.4	14159.2	14375.2
ENSMUSG00000019929	Dcn	TRUE	1.31189	37.5138	5e-308	9e-305	32877.6	33158	34020.8	13491.2	13547.1	13264.5
ENSMUSG00000038539	Atf5	TRUE	-2.50197	-49.1874	0	0	2241.83	2479.2	2417.76	13351.3	14336.9	12734.4
ENSMUSG00000014599	Csf1	TRUE	0.258916	4.2335	2.30081e-05	0.00010902	14359.9	17786.3	17284.4	13288.9	13840.1	14177.7
ENSMUSG00000049775	Tmsb4x	TRUE	-0.028749	-0.609853	0.541959	0.675054	12710.9	12860.8	12258.4	13166.3	13118.3	12303
ENSMUSG00000068699	Flnc	TRUE	-0.146378	-2.61618	0.00889193	0.0243127	11561.5	11247.6	13352.7	13136.2	13040.1	13858.2
ENSMUSG00000070469	Adamtsl3	TRUE	-0.564556	-10.051	9.09004e-24	2.16245e-22	9527.78	8330.87	9841.47	13124.3	13700.6	14154.5
ENSMUSG00000028649	Macf1	TRUE	-0.351076	-2.69335	0.00707387	0.0199485	11318.1	9483.75	12781.1	13056.6	13986.2	15796.3
ENSMUSG00000000957	Mmp14	TRUE	0.587641	16.2362	2.79758e-59	2.15356e-57	19089.9	20476.3	20375.2	13050.1	13248.5	13586.1
ENSMUSG00000020422	Tns3	TRUE	-0.183481	-4.57244	4.82088e-06	2.52852e-05	11881.5	10653.6	11832.7	12844.6	12999.2	13198
ENSMUSG00000020719	Ddx5	TRUE	0.0687926	1.68918	0.0911858	0.173243	12783.5	13526.2	12604.5	12783.3	12259.7	12054.1
ENSMUSG00000055320	Tead1	TRUE	-0.387409	-9.037	1.61032e-19	2.94069e-18	10143.2	9237.75	10285.5	12765	12783.4	13270.6
ENSMUSG00000000787	Ddx3x	TRUE	-0.0738091	-1.97501	0.0482672	0.103269	12154.4	11847.3	12665.7	12715.5	12945.3	12939
ENSMUSG00000020458	Rtn4	TRUE	-0.165845	-4.85946	1.17708e-06	6.76199e-06	11421.2	11515.2	11579.2	12681.1	13265.3	12770.7
ENSMUSG00000026219	Trip12	TRUE	-0.119078	-2.4435	0.0145454	0.0371203	11820.6	10626.4	12258.4	12627.3	12314.5	12762.6
ENSMUSG00000025393	Atp5b	TRUE	-0.135002	-4.00642	6.1647e-05	0.000272252	11653.8	12059.3	11798.6	12575.7	13322	13088.2
ENSMUSG00000024620	Pdgfrb	TRUE	0.158724	3.17764	0.0014848	0.0049918	13103.5	15428.4	15092.2	12572.4	13133.2	13369.4
ENSMUSG00000033420	Antxr1	TRUE	0.442633	10.6059	2.79897e-26	7.61149e-25	17767.8	16101.7	17276.6	12502.5	12335	12801.9
ENSMUSG00000023175	Bsg	TRUE	-0.278104	-7.35748	1.87421e-13	2.28729e-12	10311	10485.9	10668.4	12453	12861.5	12840.2
ENSMUSG00000043079	Synpo	TRUE	-0.000454164	-0.00922554	0.992639	0.996156	11265.1	13365.2	12788.1	12401.4	12570.4	12453.2
ENSMUSG00000039262	Prrc2b	TRUE	-0.229943	-4.68395	2.81397e-06	1.53323e-05	10813.6	9936.06	11539	12383.1	12483.9	13013.6
ENSMUSG00000026490	Cdc42bpa	TRUE	0.22215	4.4212	9.81527e-06	4.91779e-05	14623.9	13304	15102.7	12247.5	12139.7	12510.7
ENSMUSG00000030770	Parva	TRUE	-0.00418281	-0.118796	0.905437	0.944117	12143.6	12437.9	12525	12228.2	12107.1	12880.5
ENSMUSG00000024359	Hspa9	TRUE	-1.5441	-34.283	1.40759e-257	1.92084e-254	4141.1	4492.48	4352.14	12197	12725.7	12935
ENSMUSG00000029581	Fscn1	TRUE	-0.145271	-3.35023	0.000807437	0.00288651	10220.7	11415.4	11490.9	12193.7	12322	12119.6
ENSMUSG00000020612	Prkar1a	TRUE	-0.214911	-7.02055	2.20993e-12	2.45365e-11	10423.9	10918.9	10779.4	12183	12613.2	12478.4
ENSMUSG00000030084	Plxna1	TRUE	-0.227387	-4.71115	2.46321e-06	1.35045e-05	10650.7	10023.3	11122.9	12178.7	11993.6	13063
ENSMUSG00000020900	Myh10	TRUE	-0.228704	-3.69008	0.000224183	0.00089763	10636.9	9733.14	11162.2	12076.5	12116.4	12763.6
ENSMUSG00000026276	Sept2	TRUE	-0.131083	-4.6062	4.10096e-06	2.17833e-05	11041.3	10871.3	11270.6	12059.2	12048.5	12240.6
ENSMUSG00000004665	Cnn2	TRUE	0.305157	6.91645	4.63109e-12	4.97618e-11	14160.6	15693.6	15664.7	12044.2	12279.2	12515.7
ENSMUSG00000025016	Tm9sf3	TRUE	-0.140119	-3.95222	7.74284e-05	0.000336015	11032.5	10583.3	11339.7	12032.4	12137.8	12156.9
ENSMUSG00000022283	Pabpc1	TRUE	-0.425444	-10.3982	2.52684e-25	6.58514e-24	9463.98	9383.99	9497.95	12028	12608.5	13430.8
ENSMUSG00000037242	Clic4	TRUE	-0.117757	-3.74402	0.000181099	0.00073932	10437.7	11054.9	10955.9	11978.6	11599.2	11630.8
ENSMUSG00000027763	Mbnl1	TRUE	-0.252543	-6.29251	3.12379e-10	2.79447e-09	10207	9525.69	10601.1	11972.1	11927.6	12251.6
ENSMUSG00000016487	Ppfibp1	TRUE	-0.218102	-6.83837	8.00971e-12	8.42563e-11	10280.6	10212.7	10442.9	11784.9	11817.8	12386.7
ENSMUSG00000030607	Acan	TRUE	-1.01331	-7.73848	1.00614e-14	1.36064e-13	6094.36	5292.81	6361.69	11775.2	11853.1	12202.3
ENSMUSG00000020372	Gnb2l1	TRUE	-0.232362	-5.98347	2.18435e-09	1.78883e-08	10157.9	10392.9	10122.9	11710.7	12365.7	11950.3
ENSMUSG00000037206	Islr	TRUE	0.634574	15.4215	1.17305e-53	7.72312e-52	17615.6	17956.3	18127.9	11685.9	11454.1	11451.4
ENSMUSG00000028063	Lmna	TRUE	0.342653	8.30624	9.87784e-17	1.53336e-15	13995.7	15652.8	15345.7	11618.1	11940.6	11919
ENSMUSG00000001440	Kpnb1	TRUE	-0.145076	-4.51624	6.2948e-06	3.25271e-05	10399.4	10709.2	10962.9	11597.7	11888.5	11979.5
ENSMUSG00000031799	Tpm4	TRUE	0.348507	8.31104	9.4867e-17	1.4757e-15	14305.9	16011	15425.2	11578.3	12050.4	12290.9
ENSMUSG00000036334	Igsf10	TRUE	-0.196896	-2.01396	0.0440138	0.0957662	10932.4	8581.4	11022.4	11498.7	11380.6	12127.7
ENSMUSG00000039630	Hnrnpu	TRUE	-0.0910647	-2.41056	0.0159279	0.0401487	10428.8	10871.3	10852.8	11356.7	11527.6	11361.7
ENSMUSG00000006699	Cdc42	TRUE	-0.0948479	-3.4475	0.000565805	0.00208581	10698.7	10661.6	10639.5	11339.5	11509	11323.4
ENSMUSG00000028399	Ptprd	TRUE	-0.159525	-2.67725	0.00742289	0.0208038	10946.1	9181.07	11281.1	11252.4	11494.1	12345.4
ENSMUSG00000096052	9930004E17Rik	FALSE	2.21822	2.46535	0.0136879	0.0351952	8.83383	11.3361	3.49639	2.15171	1.86048	1.00787
ENSMUSG00000036275	9530068E07Rik	TRUE	-0.0675475	-2.28569	0.0222724	0.0535958	10935.3	10899.6	10976.9	11244.8	11591.8	11546.1
ENSMUSG00000024576	Csnk1a1	TRUE	-0.150827	-5.09682	3.45404e-07	2.14516e-06	10275.7	10081.2	10117.7	11226.5	11494.1	11110.7
ENSMUSG00000021877	Arf4	TRUE	0.121914	3.94132	8.10335e-05	0.000349539	12512.6	12308.7	12566.9	11216.9	11480.1	11663
ENSMUSG00000033306	Lpp	TRUE	0.107304	0.991207	0.321585	0.462829	13076	10711.4	13962	11134	11589.9	12323.2
ENSMUSG00000046841	Ckap4	TRUE	0.313209	9.3456	9.1371e-21	1.80708e-19	13912.3	14151.9	14282.8	11119	11716.4	11243.8
ENSMUSG00000019877	Serinc1	TRUE	-0.283133	-8.91944	4.68645e-19	8.40481e-18	9391.34	8941.88	9429.77	11094.2	11379.7	11318.4
ENSMUSG00000025579	Gaa	TRUE	-0.131261	-3.25987	0.00111462	0.00385875	10047	10133.3	10766.3	11071.6	11121	11708.4
ENSMUSG00000019539	Rcn3	TRUE	0.193758	5.54819	2.88647e-08	2.08613e-07	12676.5	13121.5	13328.2	11056.6	11615	11535
ENSMUSG00000066324	Impad1	TRUE	-0.273515	-5.2247	1.74435e-07	1.13255e-06	9400.18	8092.81	9055.66	11050.1	10704.3	10346.8
ENSMUSG00000025261	Huwe1	TRUE	-0.302278	-2.6351	0.00841135	0.0231802	9775.12	7833.22	10316.1	11042.6	11284.8	12110.5
ENSMUSG00000031246	Sh3bgrl	TRUE	0.0525521	1.47832	0.139323	0.241826	11522.3	11155.8	11640.4	10986.6	11262.4	10845.7
ENSMUSG00000085781	Gm15640	FALSE	2.19103	3.3572	0.000787368	0.00282215	20.6123	14.7369	10.4892	2.15171	2.79073	5.03934
ENSMUSG00000038991	Txndc5	TRUE	0.0688206	1.98768	0.0468467	0.100708	11864.8	11650.1	12142.1	10933.9	11406.6	11658
ENSMUSG00000035325	Sec31a	TRUE	-0.00763624	-0.230782	0.817484	0.884288	10722.3	10833.9	11333.6	10925.3	10847.6	11299.2
ENSMUSG00000039952	Dag1	TRUE	-0.206576	-4.7622	1.91491e-06	1.06818e-05	9544.46	9025.77	10018.9	10860.7	10660.6	11481.6
ENSMUSG00000030201	Lrp6	TRUE	-0.357253	-5.0783	3.80817e-07	2.34665e-06	9177.37	7379.77	9107.23	10794	10684.8	11407
ENSMUSG00000022961	Son	TRUE	-0.0778333	-1.79051	0.0733713	0.145646	10432.8	9483.75	10295.1	10779	10372.2	10745.9
ENSMUSG00000005973	Rcn1	TRUE	0.105101	3.56206	0.000367962	0.00141266	11733.3	11630.8	11842.3	10768.2	11085.7	10878.9
ENSMUSG00000055065	Ddx17	TRUE	-0.0115378	-0.273127	0.784756	0.86376	10692.9	10968.8	9833.61	10768.2	10665.2	10304.4
ENSMUSG00000037706	Cd81	TRUE	-0.100126	-3.27234	0.0010666	0.00371394	10205	9997.27	10402.6	10740.3	11023.4	11046.2
ENSMUSG00000002900	Lamb1	TRUE	-0.109998	-2.09735	0.0359623	0.0807359	10470.1	9992.74	10962.9	10725.2	11128.5	12067.2
ENSMUSG00000068220	Lgals1	TRUE	0.351603	6.35124	2.13586e-10	1.94783e-09	13714	14685.9	13842.2	10712.3	11808.5	10578.6
ENSMUSG00000027184	Caprin1	TRUE	-0.072212	-2.18549	0.0288532	0.0668286	10493.6	10109.5	10240.1	10698.3	10820.6	10909.2
ENSMUSG00000021614	Vcan	TRUE	-0.304042	-2.8094	0.00496336	0.0146174	10120.6	7956.78	9929.76	10677.9	11573.1	12330.3
ENSMUSG00000031565	Fgfr1	TRUE	-0.0433091	-0.791356	0.428736	0.571306	9507.16	11501.6	10666.6	10653.1	10676.4	11305.2
ENSMUSG00000014444	Piezo1	TRUE	-0.292222	-6.54821	5.82314e-11	5.63579e-10	8636.54	9029.17	9507.57	10596.1	11022.4	11659
ENSMUSG00000039218	Srrm2	TRUE	-0.185243	-3.14874	0.00163974	0.0054601	9667.15	9283.1	10463.8	10591.8	11029.9	11828.3
ENSMUSG00000004980	Hnrnpa2b1	TRUE	0.158386	3.89856	9.67684e-05	0.000411965	11958.1	12450.4	11644.7	10578.9	11352.7	10361.9
ENSMUSG00000021427	Ssr1	TRUE	-0.213866	-5.95355	2.62383e-09	2.13014e-08	9524.83	8915.81	9557.39	10549.8	11001	10929.3
ENSMUSG00000037487	Ubr5	TRUE	-0.263105	-4.80738	1.52921e-06	8.63294e-06	9073.33	7998.72	9199.01	10526.2	10357.3	10654.2
ENSMUSG00000024659	Anxa1	TRUE	0.41204	10.1942	2.10419e-24	5.20362e-23	13609	14373	14171.8	10489.6	10868	10319.6
ENSMUSG00000027893	Ahcyl1	TRUE	-0.253953	-6.7204	1.81224e-11	1.8531e-10	8325.39	9001.96	9020.69	10455.1	10439.2	10524.2
ENSMUSG00000052911	Lamb2	TRUE	-0.0977747	-2.94902	0.00318788	0.00984975	9913.52	9581.24	9844.97	10427.2	10391.7	10583.6
ENSMUSG00000040690	Col16a1	TRUE	0.957607	30.4703	6.44509e-204	3.33611e-201	19985.1	20533	20447.8	10425	10758.3	10204.7
ENSMUSG00000001924	Uba1	TRUE	-0.105071	-3.27391	0.00106072	0.00369601	9550.35	9856.7	9884.3	10416.4	10531.3	10555.4
ENSMUSG00000001555	Fkbp10	TRUE	0.300379	9.78337	1.32716e-22	2.91258e-21	12610.8	12906.1	13031.1	10377.7	10478.3	10446.5
ENSMUSG00000053477	Tcf4	TRUE	-0.391351	-11.6185	3.31752e-31	1.08732e-29	7550.96	7692.65	7880	10351.9	10028.9	9955.72
ENSMUSG00000097254	AC155636.1	FALSE	2.11075	2.98951	0.00279427	0.00878056	6.87076	14.7369	16.6079	0	7.44194	1.00787
ENSMUSG00000071650	Ganab	TRUE	-0.515187	-16.5584	1.39349e-61	1.13683e-59	7333.06	7240.34	7400.99	10347.6	10334.1	10729.8
ENSMUSG00000032097	Ddx6	TRUE	-0.233308	-5.07319	3.91211e-07	2.40576e-06	9204.85	8127.95	9256.7	10330.4	10567.6	10371
ENSMUSG00000067274	Rplp0	TRUE	-0.268947	-6.03085	1.631e-09	1.35415e-08	8758.25	9177.67	9238.34	10330.4	11029.9	11379.8
ENSMUSG00000017009	Sdc4	TRUE	-0.215597	-3.88794	0.000101099	0.000429184	8082.95	9716.14	9507.57	10320.7	10770.3	10612.8
ENSMUSG00000031960	Aars	TRUE	-1.44502	-32.9719	2.05525e-238	1.71397e-235	3543.35	3905.27	4011.24	10315.3	10390.8	10499
ENSMUSG00000097767	Miat	FALSE	2.09851	4.7971	1.60983e-06	9.06759e-06	36.3169	32.8746	25.3488	6.45512	7.44194	8.06294
ENSMUSG00000030208	Emp1	TRUE	0.67323	10.0796	6.80273e-24	1.63385e-22	16275.8	19458.3	17934.7	10308.8	11635.5	11706.4
ENSMUSG00000031010	Usp9x	TRUE	-0.31935	-4.61768	3.88062e-06	2.07081e-05	8839.72	7089.57	8908.81	10283	10027.1	10693.5
ENSMUSG00000020580	Rock2	TRUE	0.06313	1.53159	0.125624	0.223108	10115.7	10968.8	11360.7	10266.9	10298.7	10492.9
ENSMUSG00000032116	Stt3a	TRUE	-0.241303	-7.36221	1.80892e-13	2.20942e-12	8971.25	8677.75	8936.78	10210.9	10385.2	10834.6
ENSMUSG00000029050	Ski	TRUE	-0.24571	-8.04614	8.5445e-16	1.24647e-14	8540.35	8625.61	8945.52	10176.5	10282.9	10507
ENSMUSG00000029064	Gnb1	TRUE	-0.176359	-5.76912	7.96873e-09	6.06893e-08	8990.88	9295.57	9240.97	10161.4	10433.6	10507
ENSMUSG00000084939	Gm830	FALSE	2.07234	2.40222	0.0162958	0.0409193	12.76	6.80163	5.24459	0	3.72097	2.01573
ENSMUSG00000015143	Actn1	TRUE	0.0184247	0.42019	0.674346	0.781427	9956.71	10620.8	11074.8	10148.5	10240.1	10864.8
ENSMUSG00000022894	Adamts5	TRUE	0.059207	0.87899	0.379407	0.523078	12229	9258.16	11286.4	10133.5	10398.2	10931.3
ENSMUSG00000020850	Prpf8	TRUE	-0.361718	-6.83585	8.15189e-12	8.56918e-11	8258.65	7485.2	8504.98	10106.6	10217.8	10844.7
ENSMUSG00000034462	Pkd2	TRUE	-0.258262	-7.56991	3.73491e-14	4.79186e-13	8285.15	8240.18	8509.35	10095.8	9836.38	10018.2
ENSMUSG00000013236	Ptprs	TRUE	-0.358486	-10.3575	3.86796e-25	9.97628e-24	8143.81	7825.28	8317.04	10094.7	10385.2	10666.3
ENSMUSG00000032458	Copb2	TRUE	-0.0328828	-1.07401	0.282819	0.420128	9931.19	10088	10221.7	10093.7	10277.3	10567.5
ENSMUSG00000032855	Pkd1	TRUE	-0.101719	-1.67503	0.0939284	0.177153	9619.06	8494.11	10328.3	10088.3	10027.1	10414.3
ENSMUSG00000049470	Aff4	TRUE	-0.354482	-6.72926	1.70529e-11	1.75209e-10	8115.35	7133.78	8521.58	10057.1	9968.48	10381
ENSMUSG00000024048	Myl12a	TRUE	0.000339805	0.00783804	0.993746	0.996734	9805.55	10553.9	10555.6	10046.3	10553.6	10304.4
ENSMUSG00000023067	Cdkn1a	TRUE	-0.0195902	-0.437512	0.66174	0.772005	9779.05	10297.7	9983.08	10044.2	10384.3	10037.4
ENSMUSG00000058013	Sept11	TRUE	-0.169057	-4.95069	7.39501e-07	4.39108e-06	8958.49	8990.63	9119.47	10021.6	9966.62	10448.6
ENSMUSG00000030934	Oat	TRUE	-0.0533464	-1.50323	0.132779	0.233089	9924.32	9680.99	9710.36	10015.1	10005.7	10400.2
ENSMUSG00000079037	Prnp	TRUE	-0.357381	-8.78254	1.59827e-18	2.77039e-17	8167.37	7808.28	8077.54	9974.24	10476.4	10365.9
ENSMUSG00000032562	Gnai2	TRUE	-0.0286794	-0.73196	0.464193	0.604809	9347.17	10032.4	9792.52	9966.71	9925.69	9861.98
ENSMUSG00000029467	Atp2a2	TRUE	-0.136523	-3.60162	0.000316241	0.00122918	8669.91	8863.66	9606.34	9926.91	9814.06	10103.9
ENSMUSG00000026335	Pam	TRUE	0.394864	10.3551	3.9674e-25	1.02152e-23	13303.7	12857.4	13375.5	9920.45	10164.8	9986.96
ENSMUSG00000020849	Ywhae	TRUE	-0.0620114	-2.09986	0.0357409	0.0803635	9439.44	9668.52	9720.85	9889.25	9965.69	10239.9
ENSMUSG00000024598	Fbn2	TRUE	0.115638	0.680575	0.496141	0.634321	12878.7	9026.9	12781.9	9835.46	10812.2	11369.8
ENSMUSG00000025132	Arhgdia	TRUE	0.0282442	0.748026	0.454444	0.595522	9650.47	10422.4	10225.2	9816.09	9951.73	9938.58
ENSMUSG00000033161	Atp1a1	TRUE	-0.34834	-7.92692	2.2465e-15	3.18134e-14	7304.6	8205.04	7991.01	9808.56	9824.29	10281.3
ENSMUSG00000014867	Surf4	TRUE	0.0681971	2.36771	0.0178983	0.0443207	10421	10378.2	10317.9	9796.73	9888.48	9993.01
ENSMUSG00000097828	AC132347.1	FALSE	2.0163	2.89269	0.00381963	0.0115761	11.7784	18.1377	6.99279	2.15171	3.72097	3.0236
ENSMUSG00000026234	Ncl	TRUE	-0.282566	-8.65744	4.82486e-18	8.15608e-17	7880.76	8142.69	7915.83	9756.92	9780.57	9574.74
ENSMUSG00000064345	mt-Nd2	TRUE	0.40996	6.72344	1.77487e-11	1.81861e-10	14678.9	12316.6	12497	9692.37	10670.8	9359.06
ENSMUSG00000025428	Atp5a1	TRUE	-0.0415381	-1.37367	0.169545	0.282783	9611.21	9424.8	9431.52	9680.53	9828.01	9789.42
ENSMUSG00000033565	Rbfox2	TRUE	-0.100691	-3.2452	0.00117368	0.00403623	9154.79	8952.09	9246.21	9671.93	10044.8	9616.06
ENSMUSG00000057751	Megf6	TRUE	-0.341694	-7.91722	2.42875e-15	3.42329e-14	7806.16	7021.55	7759.37	9666.55	9646.61	9322.77
ENSMUSG00000027712	Anxa5	TRUE	0.0942296	2.62158	0.00875234	0.0239763	10199.1	10689.9	10759.3	9652.56	9864.29	10129.1
ENSMUSG00000014329	Bicc1	TRUE	0.44566	10.6769	1.30554e-26	3.6091e-25	13001.4	12519.5	13305.5	9621.36	9193.59	9700.72
ENSMUSG00000060802	B2m	TRUE	0.262761	2.44712	0.0144002	0.0367934	11492.8	11652.3	12298.6	9615.98	9807.55	10119
ENSMUSG00000029163	Emilin1	TRUE	0.346897	10.2328	1.41304e-24	3.51178e-23	12185.8	11904	12390.3	9606.3	9860.57	9218.96
ENSMUSG00000028530	Jak1	TRUE	-0.226152	-6.56734	5.12223e-11	4.98961e-10	8140.87	8182.37	8273.34	9606.3	9387.08	9781.35
ENSMUSG00000032085	Tagln	TRUE	0.840341	13.5128	1.3145e-41	6.01585e-40	15113.7	17694.5	17363.1	9558.96	9677.31	8783.57
ENSMUSG00000031835	Mbtps1	TRUE	-0.0527472	-1.51745	0.129152	0.227842	9287.3	9110.79	9431.52	9495.49	9537.78	9837.79
ENSMUSG00000019916	P4ha1	TRUE	-1.46087	-30.1404	1.43327e-199	6.94029e-197	3305.82	3658.15	3815.44	9484.73	9863.36	10329.6
ENSMUSG00000021709	Erbb2ip	TRUE	-0.124989	-2.13693	0.0326039	0.0743682	9188.16	7596.29	8856.36	9366.39	8972.19	9633.2
ENSMUSG00000064363	mt-Nd4	TRUE	0.227122	3.78905	0.000151224	0.000625178	12423.3	10551.6	10713.8	9353.48	10328.5	9098.02
ENSMUSG00000018042	Cyb5r3	TRUE	-0.107117	-3.02215	0.00250984	0.00797864	8896.65	9251.36	9132.58	9348.1	9987.08	10040.4
ENSMUSG00000054808	Actn4	TRUE	0.118055	2.71629	0.00660175	0.0187945	9695.62	10594.7	10712.9	9326.58	9378.7	9861.98
ENSMUSG00000085007	Gm11549	FALSE	1.97878	3.3987	0.000677074	0.00245615	14.7231	14.7369	17.482	1.07585	4.65121	6.0472
ENSMUSG00000027642	Rpn2	TRUE	-0.236434	-6.65481	2.83671e-11	2.83879e-10	8204.67	7889.9	8262.85	9301.83	9748.94	9648.32
ENSMUSG00000028195	Cyr61	TRUE	0.234682	1.688	0.0914109	0.173475	8262.58	11709	13145.6	9291.08	9558.24	9296.57
ENSMUSG00000024759	Atl3	TRUE	-0.059088	-1.29114	0.196655	0.317316	9228.41	8135.89	9039.92	9284.62	9211.26	9022.43
ENSMUSG00000034707	Gns	TRUE	-0.0181322	-0.50393	0.61431	0.735536	9213.68	9126.66	9511.06	9276.01	9294.05	9639.24
ENSMUSG00000031626	Sorbs2	TRUE	0.260907	4.88865	1.01529e-06	5.9026e-06	11576.2	10207	12113.3	9272.79	9280.1	9745.07
ENSMUSG00000030306	Tmtc1	TRUE	-0.855724	-6.95305	3.57465e-12	3.89964e-11	5048.04	4375.72	5273.43	9270.63	8591.72	8739.22
ENSMUSG00000085604	Gm11547	FALSE	1.96361	6.21335	5.18665e-10	4.54771e-09	63.7999	70.2836	54.1941	17.2137	14.8839	16.1259
ENSMUSG00000055980	Irs1	TRUE	0.308086	6.32753	2.49114e-10	2.25404e-09	11486.9	10897.4	12427.9	9231.9	9561.03	9331.85
ENSMUSG00000031633	Slc25a4	TRUE	-0.257217	-7.31067	2.65817e-13	3.20239e-12	7862.11	7723.26	7852.02	9231.9	9563.82	9215.94
ENSMUSG00000024330	Col11a2	TRUE	-0.0586996	-0.809519	0.418217	0.560943	8022.1	8809.25	8879.96	9224.37	9296.84	8257.46
ENSMUSG00000032816	Igdcc4	TRUE	-0.296398	-5.31275	1.07984e-07	7.20745e-07	7717.82	6866.25	7609.9	9216.84	8865.21	9182.68
ENSMUSG00000026796	Fam129b	TRUE	0.137086	3.01811	0.00254357	0.00807904	9582.74	10873.5	10636	9202.86	9713.59	9352
ENSMUSG00000063415	Cyp26b1	TRUE	-1.16665	-11.5774	5.36763e-31	1.74401e-29	3855.48	3593.53	4126.62	9191.02	8721.02	8080.07
ENSMUSG00000028273	Pdlim5	TRUE	0.0313221	0.917627	0.358814	0.501972	9046.82	9029.17	9358.97	9149.06	8943.35	8760.38
ENSMUSG00000037362	Nov	TRUE	1.10337	11.2752	1.74015e-29	5.41937e-28	21280.7	18142.2	19704.8	9121.09	9549.87	8849.08
ENSMUSG00000026615	Eprs	TRUE	-1.02059	-25.2431	1.34743e-140	3.88966e-138	4541.57	4371.18	4710.52	9118.94	9204.75	9329.83
ENSMUSG00000068823	Csde1	TRUE	-0.208978	-6.21507	5.13032e-10	4.50622e-09	8012.28	7774.27	8043.45	9116.79	9268.94	9163.53
ENSMUSG00000040010	Slc7a5	TRUE	-3.01326	-51.4282	0	0	1055.15	1229.96	1206.26	9106.03	9497.77	9571.72
ENSMUSG00000032925	Itgbl1	TRUE	0.231733	6.72062	1.80957e-11	1.85163e-10	10456.3	10429.2	10765.4	9100.65	8970.33	8888.38
ENSMUSG00000061306	Slc38a10	TRUE	0.139326	4.13483	3.55223e-05	0.000163366	9981.25	9852.17	10341.5	9090.97	9039.17	9274.4
ENSMUSG00000020964	Sel1l	TRUE	-0.411594	-10.3669	3.50605e-25	9.07401e-24	6986.58	6657.67	7177.22	9082.36	9102.42	9522.33
ENSMUSG00000001833	Sept7	TRUE	-0.0842262	-2.75599	0.00585146	0.0168721	8741.57	8767.31	8643.96	9079.13	9397.31	9242.14
ENSMUSG00000026223	Itm2c	TRUE	-0.0018693	-0.0466643	0.962781	0.97849	9110.62	9005.36	9233.97	9062.99	9545.22	8776.51
ENSMUSG00000039361	Picalm	TRUE	-0.0575388	-1.78604	0.0740934	0.146827	8886.83	8768.44	8691.16	9053.31	9106.14	9257.26
ENSMUSG00000020122	Egfr	TRUE	-0.0130389	-0.240448	0.809983	0.879215	9520.91	8329.74	9574.87	9031.79	9046.61	9604.98
ENSMUSG00000020571	Pdia6	TRUE	-0.125346	-4.02116	5.79133e-05	0.000257048	8465.75	8227.71	8505.85	8999.52	9240.1	9251.22
ENSMUSG00000032243	Itga11	TRUE	-0.112523	-2.73476	0.0062426	0.0178729	8118.29	8782.04	8863.36	8985.53	9274.52	9591.87
ENSMUSG00000068566	Myadm	TRUE	0.321373	8.88842	6.19847e-19	1.10243e-17	11149.3	11011.8	11809.9	8976.93	9056.84	9160.51
ENSMUSG00000029860	Zyx	TRUE	0.111932	1.56368	0.117893	0.212372	8576.67	11363.3	10261	8969.4	9413.12	9558.62
ENSMUSG00000038587	Akap12	TRUE	-0.250952	-4.5913	4.40492e-06	2.32661e-05	7924.93	8220.91	8324.04	8939.27	9581.5	10596.7
ENSMUSG00000017774	Myo1c	TRUE	0.0657296	1.84482	0.065064	0.131876	9120.44	9484.88	9826.61	8932.82	9092.19	9143.37
ENSMUSG00000032336	Nptn	TRUE	-0.121119	-3.97263	7.10834e-05	0.000309914	8411.77	8177.83	8310.93	8844.6	9035.44	9202.84
ENSMUSG00000023010	Tmbim6	TRUE	-0.0608996	-1.62046	0.105134	0.193735	8240	8588.2	8483.12	8835.99	8904.28	8659.6
ENSMUSG00000030744	Rps3	TRUE	-0.250281	-5.37179	7.79568e-08	5.30226e-07	7868.98	7708.52	7569.69	8828.46	9804.75	8892.41
ENSMUSG00000022462	Slc38a2	TRUE	-0.10007	-1.70035	0.0890657	0.170076	8893.7	7241.47	8123.87	8823.08	8461.48	8725.11
ENSMUSG00000032374	Plod2	TRUE	-0.621649	-16.2495	2.25324e-59	1.74347e-57	6135.59	5730.38	6095.96	8808.02	9473.59	9362.08
ENSMUSG00000020053	Igf1	TRUE	0.589975	9.25635	2.11532e-20	4.10247e-19	14543.4	11505	13723.3	8798.33	8692.18	8937.77
ENSMUSG00000022139	Mbnl2	TRUE	-0.378568	-10.4397	1.63405e-25	4.30328e-24	6855.05	6455.89	7041.74	8788.65	8749.86	8936.76
ENSMUSG00000028618	Tmem59	TRUE	-0.22054	-5.54623	2.91903e-08	2.10661e-07	7650.1	7340.1	7285.61	8780.04	8921.02	8252.42
ENSMUSG00000039953	Clstn1	TRUE	-0.267543	-6.97839	2.98583e-12	3.27481e-11	7645.19	7224.47	7803.07	8771.44	9262.42	9266.33
ENSMUSG00000063870	Chd4	TRUE	0.136596	3.03475	0.00240734	0.00769944	9640.65	9530.22	10199.9	8764.98	8785.21	9172.6
ENSMUSG00000025823	Pdia4	TRUE	-0.237973	-6.94576	3.76417e-12	4.09152e-11	7662.86	7333.3	7658.85	8757.45	8819.63	9148.41
ENSMUSG00000031078	Cttn	TRUE	-0.000467266	-0.0123864	0.990117	0.99449	8752.36	9294.43	9176.28	8735.93	9072.65	9418.52
ENSMUSG00000038014	Fam120a	TRUE	0.0135356	0.399753	0.689339	0.79256	8965.36	8723.1	8952.51	8712.27	8842.88	8840.01
ENSMUSG00000026604	Ptpn14	TRUE	-0.31167	-6.36716	1.92566e-10	1.76579e-09	7528.39	6828.84	7764.61	8688.6	9113.58	9664.44
ENSMUSG00000037111	Setd7	TRUE	-0.0781954	-1.62835	0.103451	0.191237	8680.71	7677.91	8675.43	8686.45	8893.12	8858.15
ENSMUSG00000021477	Ctsl	TRUE	-0.312714	-8.4067	4.21715e-17	6.72013e-16	7117.12	6967.14	7019.88	8676.76	8696.84	8840.01
ENSMUSG00000026131	Dst	TRUE	-0.614924	-3.91833	8.9163e-05	0.000382626	6403.55	4923.25	7252.39	8633.73	9164.75	10659.2
ENSMUSG00000021109	Hif1a	TRUE	-0.449245	-12.3801	3.34892e-35	1.25677e-33	6447.71	5999.04	6558.36	8625.12	8742.42	8596.1
ENSMUSG00000024991	Eif3a	TRUE	-0.239454	-7.07227	1.52421e-12	1.72418e-11	7203.5	7253.94	7470.04	8616.52	8442.88	8833.96
ENSMUSG00000066036	Ubr4	TRUE	-0.529017	-4.08402	4.42634e-05	0.000200494	6227.85	5296.21	7209.56	8583.16	8658.7	9794.46
ENSMUSG00000041891	Lman1	TRUE	-0.331372	-9.6306	5.93821e-22	1.26258e-20	6984.62	6890.06	7100.3	8564.87	8828.93	9000.26
ENSMUSG00000038119	Cdon	TRUE	-1.00184	-21.5021	1.48741e-102	2.10636e-100	4381.58	3850.86	4451.78	8545.51	8393.58	8486.24
ENSMUSG00000041734	Kirrel	TRUE	0.0753335	1.71835	0.0857322	0.165225	9516.98	8738.97	9694.62	8473.43	8860.56	9201.83
ENSMUSG00000028692	Akr1a1	TRUE	-0.000475045	-0.0148141	0.98818	0.993342	8493.24	8609.74	8293.44	8461.59	8601.95	8333.05
ENSMUSG00000037815	Ctnna1	TRUE	-0.180606	-4.67994	2.86966e-06	1.56187e-05	7568.63	7675.65	7813.56	8460.52	8497.76	9176.63
ENSMUSG00000016382	Pls3	TRUE	0.385602	11.8735	1.62504e-32	5.49402e-31	10669.3	11150.1	11112.4	8458.36	8414.97	8334.06
ENSMUSG00000033684	Qsox1	TRUE	0.563072	14.5543	5.48552e-48	3.03849e-46	11810.8	12886.8	12810.8	8437.92	8557.3	8390.5
ENSMUSG00000021218	Gdi2	TRUE	-0.0561859	-1.96335	0.0496051	0.10562	8152.64	8078.08	8164.95	8431.47	8454.04	8481.2
ENSMUSG00000032531	Amotl2	TRUE	-0.056541	-1.44813	0.147582	0.252462	8010.32	7821.88	8678.92	8425.01	8403.81	8674.72
ENSMUSG00000019818	Cd164	TRUE	-0.0959615	-3.20078	0.00137055	0.00464513	7757.08	7707.39	8002.37	8406.72	8354.51	8328.01
ENSMUSG00000032437	Stt3b	TRUE	-0.437982	-13.931	4.10675e-44	2.02784e-42	6141.48	6003.58	6222.71	8345.4	8245.67	8301.8
ENSMUSG00000026147	Col9a1	TRUE	-0.0286361	-0.458355	0.646698	0.760008	7999.52	8053.14	8245.37	8340.02	8450.32	7995.41
ENSMUSG00000058655	Eif4b	TRUE	-0.260316	-6.77428	1.25031e-11	1.29527e-10	7236.87	6979.61	7217.43	8317.43	8609.39	8748.29
ENSMUSG00000028211	Trp53inp1	TRUE	-0.290569	-4.25387	2.10109e-05	0.000100221	7813.03	6050.05	6675.49	8293.76	8354.51	8478.18
ENSMUSG00000051391	Ywhag	TRUE	0.0225005	0.526448	0.598577	0.722429	7976.95	8793.38	8983.98	8261.48	8629.86	8463.06
ENSMUSG00000055053	Nfic	TRUE	0.175924	5.09687	3.45309e-07	2.14516e-06	9732.92	9145.93	9713.85	8251.8	8484.74	8579.98
ENSMUSG00000019817	Plagl1	TRUE	-0.471983	-7.69028	1.46812e-14	1.95546e-13	6564.52	5368.76	6371.3	8209.84	8334.04	8856.13
ENSMUSG00000025743	Sdc3	TRUE	0.337142	8.6495	5.17271e-18	8.72444e-17	10102	10086.8	10826.6	8208.77	8159.16	8190.94
ENSMUSG00000019978	Epb4.1l2	TRUE	-0.0322889	-0.889612	0.373675	0.517102	8086.88	7982.85	8323.16	8206.61	8261.48	8482.21
ENSMUSG00000056429	Tgoln1	TRUE	-0.44407	-12.8614	7.4243e-38	3.02022e-36	6020.75	5904.95	6218.33	8203.39	8131.25	8360.26
ENSMUSG00000020088	Sar1a	TRUE	0.114402	3.62292	0.000291298	0.00114199	8724.88	8837.59	8871.22	8177.57	8284.74	7955.1
ENSMUSG00000020986	Sec23a	TRUE	-0.197377	-5.88245	4.04239e-09	3.18532e-08	7067.06	6939.93	7434.21	8168.96	8138.69	8289.71
ENSMUSG00000021796	Bmpr1a	TRUE	-0.27113	-5.98075	2.22111e-09	1.81596e-08	6940.45	6316.45	6873.91	8146.37	7947.99	8209.08
ENSMUSG00000003970	Rpl8	TRUE	-0.0350947	-0.841585	0.40002	0.543609	8055.47	8239.05	8113.38	8080.74	8683.81	8238.31
ENSMUSG00000027797	Dclk1	TRUE	-0.387867	-6.97778	2.99881e-12	3.28578e-11	6561.57	5487.79	6461.33	8068.91	8207.53	7956.11
ENSMUSG00000085996	A830012C17Rik	FALSE	1.7761	2.69493	0.00704027	0.0198724	9.81537	11.3361	13.1115	4.30342	3.72097	2.01573
ENSMUSG00000041028	Ghitm	TRUE	-0.874511	-23.5513	1.21738e-122	2.46947e-120	4526.85	4592.24	4558.42	8066.75	8614.97	8387.47
ENSMUSG00000020358	Hnrnpab	TRUE	0.055374	1.27507	0.202286	0.32483	8091.79	8758.24	9035.55	8036.63	8627.07	8245.36
ENSMUSG00000029185	Fam114a1	TRUE	0.176072	5.94222	2.81187e-09	2.26867e-08	8986.95	8940.75	9131.7	8021.57	7867.06	8067.98
ENSMUSG00000022043	Trim35	TRUE	-0.449099	-14.28	2.91743e-46	1.52061e-44	5852.9	5918.56	5989.32	7997.9	8101.48	8148.61
ENSMUSG00000030695	Aldoa	TRUE	-0.577355	-13.6825	1.29136e-42	6.15385e-41	5273.8	5725.84	5561.89	7981.76	8326.6	8395.54
ENSMUSG00000025964	Adam23	TRUE	1.0634	21.6562	5.31812e-104	7.75052e-102	16354.4	15095.1	16983.7	7975.31	7483.8	7723.29
ENSMUSG00000027663	Zmat3	TRUE	-0.021017	-0.505597	0.61314	0.734955	8412.75	7862.69	8185.93	7969.93	8093.11	8761.39
ENSMUSG00000022817	Itgb5	TRUE	0.142404	3.92353	8.72602e-05	0.000374782	8805.37	8778.64	9147.44	7918.29	8041.02	8263.51
ENSMUSG00000020745	Pafah1b1	TRUE	-0.233086	-6.99168	2.71611e-12	2.99131e-11	6669.54	6488.76	6951.7	7913.98	7837.29	7898.66
ENSMUSG00000026478	Lamc1	TRUE	0.00272574	0.0468314	0.962648	0.978421	8459.86	7706.25	8636.09	7910.75	8019.62	8830.93
ENSMUSG00000074743	Thbd	TRUE	-0.354075	-8.51938	1.60416e-17	2.62597e-16	6166.99	6167.95	6351.2	7880.63	7925.67	8081.08
ENSMUSG00000001729	Akt1	TRUE	-0.114781	-2.84384	0.00445735	0.013302	7413.55	7770.87	7616.89	7866.64	8142.41	8675.72
ENSMUSG00000001175	Calm1	TRUE	-0.159254	-4.68709	2.77111e-06	1.51043e-05	6901.18	7106.57	6912.37	7834.37	7641.01	7883.54
ENSMUSG00000029763	Exoc4	TRUE	-0.104014	-2.60474	0.00919438	0.0250484	7818.92	7145.12	7473.54	7821.46	8032.64	8265.52
ENSMUSG00000029070	Mxra8	TRUE	0.364809	9.59619	8.29562e-22	1.75388e-20	9912.54	10643.4	10289	7806.4	7934.97	8207.06
ENSMUSG00000086843	E030013I19Rik	FALSE	1.7421	3.68234	0.000231106	0.000922641	27.483	24.9393	18.3561	7.53098	5.58145	8.06294
ENSMUSG00000026509	Capn2	TRUE	0.303216	8.05947	7.66242e-16	1.12106e-14	9449.25	9993.87	10253.2	7799.94	8122.88	8143.57
ENSMUSG00000074129	Rpl13a	TRUE	-0.249642	-4.01281	6.00008e-05	0.000265685	6916.89	6497.83	6334.59	7796.71	8570.32	7109.5
ENSMUSG00000027656	Wisp2	TRUE	0.441656	12.0885	1.21547e-33	4.33384e-32	10282.6	10310.1	10475.2	7785.96	7812.18	7277.81
ENSMUSG00000020149	Rab1	TRUE	-0.0263102	-0.815725	0.414658	0.557383	7679.54	7767.47	7619.51	7718.18	7810.32	7958.12
ENSMUSG00000030824	Nucb1	TRUE	0.0455508	1.21301	0.225125	0.353341	8128.11	8215.24	8359	7710.65	7943.34	8280.64
ENSMUSG00000015837	Sqstm1	TRUE	-0.235537	-6.55756	5.46964e-11	5.31423e-10	6503.66	6695.08	6649.27	7697.74	7825.2	7842.22
ENSMUSG00000054196	Cthrc1	TRUE	-0.0704245	-1.88896	0.0588968	0.121673	7121.05	7448.92	7493.64	7671.92	7961.94	7530.79
ENSMUSG00000000567	Sox9	TRUE	-0.328406	-10.4929	9.31407e-26	2.48337e-24	6142.46	5982.04	6122.18	7669.76	7630.78	7616.45
ENSMUSG00000022010	Tsc22d1	TRUE	-0.392951	-11.0281	2.79855e-28	8.25324e-27	6071.79	5603.41	5848.59	7603.06	7757.29	7656.77
ENSMUSG00000032504	Pdcd6ip	TRUE	-0.157741	-4.81017	1.50802e-06	8.52615e-06	6684.26	6701.88	6943.84	7592.3	7426.13	7668.86
ENSMUSG00000024940	Ltbp3	TRUE	-0.101416	-2.74463	0.00605786	0.0174037	6994.43	7386.58	7218.3	7574.01	7615.89	7978.28
ENSMUSG00000030082	Sec61a1	TRUE	-0.0565188	-1.73001	0.0836285	0.161959	7095.53	7371.84	7435.95	7562.18	7599.15	7617.46
ENSMUSG00000043733	Ptpn11	TRUE	-0.141927	-3.71306	0.000204769	0.000826066	6582.19	6758.56	7109.04	7560.03	7494.96	7515.67
ENSMUSG00000026434	Nucks1	TRUE	-0.178399	-4.65191	3.2888e-06	1.77456e-05	6959.1	6642.93	6913.24	7554.65	7920.08	7743.45
ENSMUSG00000029992	Gfpt1	TRUE	-0.349311	-8.20612	2.28448e-16	3.44646e-15	5840.14	5730.38	6185.99	7552.5	7574.03	7503.57
ENSMUSG00000045039	Megf8	TRUE	-0.0808096	-2.20144	0.0277047	0.0645469	7085.71	6751.76	7219.18	7540.66	7516.36	7222.38
ENSMUSG00000018326	Ywhab	TRUE	-0.0535847	-1.62397	0.104382	0.192538	7419.44	7519.21	7414.1	7532.05	7721.94	7939.98
ENSMUSG00000031207	Msn	TRUE	0.12419	2.58731	0.00967276	0.0261665	7934.74	8786.58	8722.63	7499.78	7607.52	8236.29
ENSMUSG00000063727	Tnfrsf11b	TRUE	-0.668804	-13.1645	1.40388e-39	6.16189e-38	4353.12	4486.81	4868.73	7496.55	7367.52	6938.16
ENSMUSG00000006205	Htra1	TRUE	0.601456	14.9604	1.33223e-50	7.96739e-49	10850.9	11107.1	11541.6	7491.17	7102.4	7491.48
ENSMUSG00000025544	Tm9sf2	TRUE	-0.503253	-14.5978	2.89996e-48	1.63038e-46	5386.67	5027.54	5166.79	7482.56	7325.66	7284.87
ENSMUSG00000014956	Ppp1cb	TRUE	-0.0323214	-0.929042	0.352867	0.49601	7397.84	7117.91	7441.2	7462.12	7588.92	7408.83
ENSMUSG00000057193	Slc44a2	TRUE	-0.016841	-0.34044	0.733526	0.826276	8082.95	6815.24	7442.95	7454.59	7427.06	7729.34
ENSMUSG00000058571	Gpc6	TRUE	-0.51493	-9.30773	1.306e-20	2.56265e-19	5635	4998.07	5588.11	7450.29	7625.2	8112.33
ENSMUSG00000005198	Polr2a	TRUE	-0.465108	-8.04173	8.85753e-16	1.28838e-14	5744.93	4990.13	5903.66	7430.92	7545.2	8004.48
ENSMUSG00000022025	Lect1	TRUE	0.427784	4.20321	2.63155e-05	0.000123522	9693.66	9278.56	10165.8	7401.88	7143.33	7117.56
ENSMUSG00000063077	Kif1b	TRUE	-0.368498	-7.75307	8.96994e-15	1.22074e-13	5805.79	5366.49	6085.47	7386.81	7371.24	7534.82
ENSMUSG00000063229	Ldha	TRUE	-0.325247	-8.87392	7.06156e-19	1.25297e-17	5727.27	6209.89	6031.28	7369.6	7607.52	7526.75
ENSMUSG00000054418	2900041M22Rik	FALSE	1.67485	3.25557	0.00113163	0.00390773	24.5384	18.1377	14.8597	7.53098	8.37218	2.01573
ENSMUSG00000030058	Copg1	TRUE	0.0633978	1.80297	0.0713936	0.142588	7716.84	7813.94	7879.12	7365.3	7426.13	7612.42
ENSMUSG00000020674	Pxdn	TRUE	-0.00873654	-0.172392	0.86313	0.915326	7565.68	7062.36	7881.74	7364.22	7550.78	7738.41
ENSMUSG00000030536	Iqgap1	TRUE	0.0313886	0.766405	0.443435	0.584827	7767.88	7310.62	7995.38	7363.15	7354.5	7869.43
ENSMUSG00000001098	Kctd10	TRUE	-0.107226	-2.68486	0.00725603	0.0203996	6428.08	6799.37	7119.53	7325.49	7194.49	7402.79
ENSMUSG00000061353	Cxcl12	TRUE	1.63638	23.4456	1.46592e-121	2.85778e-119	25658.4	21416.1	21875.2	7301.82	7381.47	7495.51
ENSMUSG00000037138	Aff3	TRUE	-0.245929	-4.8803	1.05924e-06	6.13436e-06	6185.64	5443.58	6120.44	7300.75	6899.61	6860.55
ENSMUSG00000060261	Gtf2i	TRUE	-0.0198429	-0.504505	0.613906	0.735399	7208.41	7044.23	7276.87	7288.91	7226.12	7317.12
ENSMUSG00000003226	Ranbp2	TRUE	-0.351553	-6.26677	3.6862e-10	3.2703e-09	5860.76	5196.45	5956.11	7235.12	6994.49	7489.46
ENSMUSG00000065547	Mir199a-1	FALSE	1.6571	2.48069	0.0131129	0.0339318	8.83383	13.6033	12.2374	2.15171	3.72097	5.03934
ENSMUSG00000048442	Smim5	FALSE	1.6564	3.12114	0.00180155	0.00593831	19.6307	19.2713	23.6007	5.37927	9.30242	5.03934
ENSMUSG00000028745	Capzb	TRUE	-0.121995	-3.22841	0.00124479	0.00425446	6569.43	6837.91	6590.7	7221.13	7281.94	7253.62
ENSMUSG00000029094	Afap1	TRUE	-0.460022	-11.5877	4.75744e-31	1.55248e-29	5217.85	4892.64	5336.37	7213.6	7042.87	7006.69
ENSMUSG00000028656	Cap1	TRUE	0.0911612	2.57044	0.0101571	0.0272556	7438.08	7701.72	7813.56	7193.16	7015.89	7342.31
ENSMUSG00000028207	Asph	TRUE	0.0589502	1.28448	0.198975	0.320405	7637.34	7088.44	7665.84	7182.4	7073.56	7246.57
ENSMUSG00000034708	Grn	TRUE	0.0303541	0.714522	0.474905	0.614763	7127.92	7044.23	7423.72	7175.95	6837.28	7140.74
ENSMUSG00000026249	Serpine2	TRUE	0.810565	20.5673	5.38546e-94	6.85095e-92	13715	13067.1	12774.1	7172.72	7691.24	7683.98
ENSMUSG00000020821	Kif1c	TRUE	0.0928967	2.7452	0.00604735	0.0173771	7709.97	7853.62	7873	7163.04	7365.66	7444.11
ENSMUSG00000051855	Mest	TRUE	0.663541	13.1273	2.29812e-39	9.97027e-38	11851.1	11183	12214.6	7160.88	7331.24	7764.61
ENSMUSG00000047793	Sned1	TRUE	0.606661	8.28528	1.17829e-16	1.81594e-15	11600.8	9838.56	10141.3	7142.6	6679.14	6920.02
ENSMUSG00000026748	Plxdc2	TRUE	0.250175	6.3841	1.72413e-10	1.59072e-09	8839.72	8249.25	8879.09	7124.31	7284.73	7431.01
ENSMUSG00000021186	Fbln5	TRUE	-0.499461	-11.213	3.52015e-29	1.074e-27	5096.14	4970.86	5220.11	7106.02	7006.59	7505.59
ENSMUSG00000027808	Serp1	TRUE	-0.266386	-7.50061	6.3523e-14	7.96611e-13	5619.3	5849.41	5866.95	7098.49	6961.93	6792.02
ENSMUSG00000020859	Spag9	TRUE	0.0702876	1.46502	0.142917	0.246504	7632.43	6868.52	7715.67	7095.26	6827.98	7247.58
ENSMUSG00000029478	Ncor2	TRUE	-0.0951073	-1.65095	0.0987487	0.184299	6331.89	6858.32	7521.62	7095.26	7197.29	7835.16
ENSMUSG00000022150	Dab2	TRUE	-0.171676	-3.42328	0.0006187	0.00226354	6253.37	5899.28	6116.94	7081.27	6363.79	7140.74
ENSMUSG00000017485	Top2b	TRUE	-0.176955	-4.14614	3.38122e-05	0.000156315	6532.13	6130.54	6492.8	7067.29	7228.91	7364.49
ENSMUSG00000036333	Kidins220	TRUE	-0.419848	-8.9506	3.53556e-19	6.36359e-18	5498.57	4922.12	5546.15	7064.06	7003.8	7306.03
ENSMUSG00000032328	Tmem30a	TRUE	-0.270162	-7.05689	1.70269e-12	1.91454e-11	5873.52	5720.18	6004.18	7059.75	7138.68	7029.88
ENSMUSG00000006740	Kif5b	TRUE	-0.276254	-6.85474	7.14405e-12	7.54144e-11	5741.01	5507.06	6019.91	7050.07	6977.75	6896.84
ENSMUSG00000001986	Gria3	TRUE	-0.107617	-2.27435	0.022945	0.055038	6901.18	6268.84	7005.02	7037.16	7126.59	7583.2
ENSMUSG00000024538	Ppic	TRUE	0.675083	22.4004	3.8972e-111	6.64783e-109	11272.9	11307.7	11260.1	7025.33	7030.77	7137.72
ENSMUSG00000005417	Mprip	TRUE	0.320943	8.76463	1.87389e-18	3.23694e-17	8698.38	9109.66	8960.38	7018.87	7185.19	7221.37
ENSMUSG00000018398	Sept8	TRUE	0.0267956	0.757723	0.448617	0.5903	7396.86	7117.91	7547.84	7008.11	7289.38	7364.49
ENSMUSG00000013076	Amotl1	TRUE	0.0339063	0.790512	0.429229	0.571759	7179.94	7370.71	7701.68	6994.13	7109.84	7634.6
ENSMUSG00000003847	Nfat5	TRUE	-0.290202	-4.70337	2.55905e-06	1.39941e-05	6083.56	5308.68	6296.13	6986.6	7112.63	7539.86
ENSMUSG00000056851	Pcbp2	TRUE	-0.0679936	-1.86633	0.0619953	0.126752	6754.94	6836.78	6887.02	6985.52	7183.33	7296.96
ENSMUSG00000007836	Hnrnpa0	TRUE	-0.0197298	-0.446584	0.655175	0.766766	6919.83	6669	6894.01	6972.61	7265.19	6527.96
ENSMUSG00000074364	Ehd2	TRUE	0.35016	9.4688	2.83077e-21	5.80501e-20	9208.78	8663.02	9258.45	6969.38	7096.82	7223.39
ENSMUSG00000022032	Scara5	TRUE	-0.832889	-14.4832	1.54716e-47	8.50713e-46	4017.43	3627.54	3998.13	6968.31	6867.98	6912.96
ENSMUSG00000050199	Lgr4	TRUE	-1.034	-17.0321	4.74982e-65	4.12136e-63	3493.29	2902.03	3284.86	6944.64	6607.51	6284.05
ENSMUSG00000052957	Gas1	TRUE	0.268768	2.15045	0.0315196	0.0721633	9848.74	6751.76	7760.24	6919.89	6897.75	6403.99
ENSMUSG00000036371	Serbp1	TRUE	-0.150012	-4.14484	3.40048e-05	0.000157109	6065.9	6309.65	6398.4	6914.51	6971.24	6946.22
ENSMUSG00000026879	Gsn	TRUE	0.739113	21.1627	2.10965e-99	2.75374e-97	12144.6	11753.2	11534.6	6906.98	7162.87	7153.84
ENSMUSG00000018340	Anxa6	TRUE	0.221573	6.25004	4.10349e-10	3.62978e-09	8108.47	8185.77	8136.11	6887.62	6924.72	7138.73
ENSMUSG00000039831	Arhgap29	TRUE	-0.0149768	-0.362118	0.717264	0.814588	6948.3	6817.51	7023.38	6882.24	6844.72	7282.85
ENSMUSG00000025982	Sf3b1	TRUE	-0.131512	-4.06988	4.70369e-05	0.000212288	6340.73	6348.19	6342.46	6877.93	6919.14	7050.03
ENSMUSG00000043131	Mob1a	TRUE	-0.351962	-9.82529	8.7619e-23	1.94563e-21	5296.37	5270.13	5604.72	6872.56	6963.79	6812.18
ENSMUSG00000020361	Hspa4	TRUE	-0.219224	-5.35851	8.39133e-08	5.68678e-07	5530.96	5952.56	5926.39	6808	6820.54	6636.81
ENSMUSG00000019820	Utrn	TRUE	-0.220819	-2.12534	0.0335587	0.0762287	6314.23	5204.38	6829.33	6777.88	6898.68	7711.19
ENSMUSG00000051236	Msrb3	TRUE	0.180115	4.99981	5.73881e-07	3.45687e-06	7670.71	7686.98	8101.14	6774.65	6854.03	7082.28
ENSMUSG00000037411	Serpine1	TRUE	0.425291	2.57316	0.0100775	0.0270807	6778.49	10815.7	10752.3	6773.58	7413.1	6922.03
ENSMUSG00000032096	Arcn1	TRUE	0.0713576	2.2838	0.0223832	0.0538366	6980.69	7130.38	7220.05	6753.14	6667.05	6884.74
ENSMUSG00000031119	Gpc4	TRUE	-0.723777	-18.6072	2.80989e-77	2.92912e-75	4242.2	4080.98	4272.59	6735.92	6930.31	7142.76
ENSMUSG00000047414	Flrt2	TRUE	0.23323	4.72481	2.30334e-06	1.26883e-05	8406.86	7528.28	8496.23	6729.47	7025.19	7035.92
ENSMUSG00000032368	Zic1	TRUE	-0.253415	-6.07445	1.24417e-09	1.04411e-08	5596.72	5343.82	5767.3	6727.32	6808.44	6388.87
ENSMUSG00000038776	Ephx1	TRUE	-0.226294	-6.59715	4.19143e-11	4.10957e-10	5957.93	5961.63	5839.85	6726.24	6980.54	7062.13
ENSMUSG00000035770	Dync1li2	TRUE	-0.0493007	-1.49452	0.135041	0.236231	6506.61	6599.85	6550.49	6716.56	6890.31	6729.53
ENSMUSG00000062078	Qk	TRUE	-0.272703	-7.42864	1.09721e-13	1.35781e-12	5503.48	5357.42	5796.15	6705.8	6624.26	6806.13
ENSMUSG00000038733	Wdr26	TRUE	-0.0839243	-2.32513	0.0200648	0.0489345	6246.5	6074.99	6323.23	6695.04	6631.7	6441.28
ENSMUSG00000023022	Lima1	TRUE	0.617083	15.8424	1.58614e-56	1.11782e-54	9854.63	10601.5	10789	6682.13	6729.37	6960.33
ENSMUSG00000040225	Prrc2c	TRUE	-0.288009	-4.25407	2.09915e-05	0.00010016	5872.53	5074.02	6334.59	6681.05	6987.05	7441.09
ENSMUSG00000024909	Efemp2	TRUE	0.346164	8.79372	1.44682e-18	2.5166e-17	8801.44	8867.06	8986.6	6648.78	7164.73	7151.83
ENSMUSG00000030738	Eif3c	TRUE	-0.816186	-24.0596	6.62163e-128	1.44054e-125	3814.25	3802.11	3853.9	6642.32	6707.05	6849.47
ENSMUSG00000034158	Lrrc58	TRUE	-0.248996	-5.45779	4.82088e-08	3.36587e-07	5774.38	5108.03	5688.63	6628.34	6569.37	6506.79
ENSMUSG00000027806	Tsc22d2	TRUE	-0.851684	-14.9217	2.3809e-50	1.40708e-48	3878.05	3213.77	3896.73	6624.03	6596.35	6628.74
ENSMUSG00000029571	Tmem106b	TRUE	-0.155581	-3.34842	0.000812734	0.00290475	6041.36	5552.4	5895.79	6615.43	6485.65	6386.86
ENSMUSG00000022687	Boc	TRUE	-0.117604	-2.48688	0.0128868	0.0334331	5542.74	6229.16	6377.42	6589.61	6438.21	6665.03
ENSMUSG00000029135	Fosl2	TRUE	-0.463442	-9.95278	2.45237e-23	5.62883e-22	4662.3	4397.26	4987.6	6576.7	6371.23	6436.24
ENSMUSG00000024587	Nars	TRUE	-1.07056	-25.6962	1.28902e-145	4.03114e-143	3005.47	3352.07	3145.01	6574.54	6774.03	6592.46
ENSMUSG00000059921	Unc5c	TRUE	-0.603941	-11.9355	7.72819e-33	2.65464e-31	4662.3	4135.39	4714.01	6572.39	6979.61	6995.61
ENSMUSG00000018474	Chd3	TRUE	0.17365	4.85958	1.17637e-06	6.76055e-06	7266.32	7142.85	7475.29	6569.16	6502.39	6337.47
ENSMUSG00000034220	Gpc1	TRUE	0.159539	3.44577	0.000569431	0.00209606	7089.64	7336.7	7769.86	6557.33	6569.37	6749.69
ENSMUSG00000097058	AC130697.1	FALSE	1.55563	2.41522	0.0157258	0.039674	9.81537	17.0041	8.74098	3.22756	4.65121	4.03147
ENSMUSG00000028849	Map7d1	TRUE	-0.095415	-2.23202	0.0256135	0.0604468	5879.4	6498.96	6470.08	6535.81	6765.65	6832.33
ENSMUSG00000051048	P4ha3	TRUE	0.525141	13.0017	1.19695e-38	5.07556e-37	9409.01	9752.41	9853.71	6523.98	6663.33	6974.44
ENSMUSG00000007817	Zmiz1	TRUE	-0.457332	-8.79865	1.38478e-18	2.41989e-17	4693.71	4642.12	5248.09	6518.6	6438.21	7078.25
ENSMUSG00000033059	Pygb	TRUE	0.0677075	1.35411	0.175701	0.290756	7050.38	6398.07	7009.39	6508.92	6327.51	6691.23
ENSMUSG00000044674	Fzd1	TRUE	0.386323	10.2461	1.23223e-24	3.07771e-23	8263.56	8592.73	9075.76	6501.39	6686.58	6654.95
ENSMUSG00000056342	Usp34	TRUE	-0.286522	-4.83999	1.29846e-06	7.41675e-06	5407.29	4922.12	5749.82	6498.16	6435.42	6688.21
ENSMUSG00000001794	Capns1	TRUE	0.111144	3.0016	0.00268564	0.00848381	6939.46	7231.27	7077.57	6474.49	6509.84	6685.19
ENSMUSG00000020671	Rab10	TRUE	-0.225206	-5.4631	4.67887e-08	3.27433e-07	5559.42	5213.45	5573.25	6446.52	6152.62	6519.89
ENSMUSG00000015932	Dstn	TRUE	0.187165	5.3288	9.88661e-08	6.65208e-07	7119.09	7430.79	7490.15	6440.06	6452.16	6466.48
ENSMUSG00000019370	Calm3	TRUE	0.178471	4.98555	6.17862e-07	3.70544e-06	7464.59	7337.83	7422.84	6440.06	6711.7	6485.63
ENSMUSG00000056201	Cfl1	TRUE	0.131725	2.7377	0.00618714	0.0177344	6785.36	7469.33	7398.37	6436.83	6615.88	6708.37
ENSMUSG00000004846	Plod3	TRUE	-0.142805	-3.64983	0.000262413	0.00103633	5691.93	5917.42	6156.27	6435.76	6631.7	6549.12
ENSMUSG00000027288	Zfp106	TRUE	-0.159341	-3.10486	0.00190366	0.00624064	5724.32	5316.61	5945.62	6425	6115.41	6440.27
ENSMUSG00000035247	Hectd1	TRUE	-0.232656	-4.19244	2.75964e-05	0.000129171	5699.78	5081.95	5897.54	6416.39	6308.9	6883.73
ENSMUSG00000026483	Fam129a	TRUE	-0.531607	-13.1873	1.03792e-39	4.56899e-38	4487.59	4503.82	4737.61	6394.88	6654.95	6801.09
ENSMUSG00000038375	Trp53inp2	TRUE	0.0687519	1.85236	0.0639748	0.130108	6544.89	6530.7	6873.03	6388.42	6329.37	6309.25
ENSMUSG00000061904	Slc25a3	TRUE	-0.133849	-3.70867	0.000208348	0.000838924	5589.85	5856.21	5684.26	6380.89	6251.23	6160.09
ENSMUSG00000021253	Tgfb3	TRUE	0.257118	6.68174	2.36114e-11	2.38353e-10	7374.29	7722.12	7962.16	6360.45	6370.3	6566.26
ENSMUSG00000022136	Dnajc3	TRUE	-0.308111	-8.55706	1.15781e-17	1.91197e-16	5032.34	4920.98	5237.6	6356.15	6173.09	6291.11
ENSMUSG00000024431	Nr3c1	TRUE	0.0744381	1.60392	0.108732	0.198948	6960.08	6177.02	6853.8	6356.15	6374.02	6263.9
ENSMUSG00000038648	Creb3l2	TRUE	-0.521171	-14.963	1.28067e-50	7.68967e-49	4479.73	4414.26	4520.84	6351.84	6289.37	6616.65
ENSMUSG00000095115	Itpripl2	TRUE	0.243261	5.98497	2.16429e-09	1.77337e-08	7524.46	7314.02	7708.67	6328.17	6631.7	6090.54
ENSMUSG00000019846	Lama4	TRUE	0.300763	5.82154	5.83067e-09	4.52555e-08	8436.31	7684.71	8325.79	6318.49	6665.19	6865.59
ENSMUSG00000001089	Luzp1	TRUE	-0.406295	-10.6932	1.09566e-26	3.04572e-25	4587.7	4609.24	4799.67	6317.41	5984.25	6257.85
ENSMUSG00000020841	Cpd	TRUE	-0.482031	-9.41903	4.55282e-21	9.21056e-20	4807.57	4195.48	4790.06	6300.2	6299.6	6678.13
ENSMUSG00000017291	Taok1	TRUE	-0.299257	-5.09787	3.43491e-07	2.13505e-06	5415.14	4626.25	5486.71	6289.44	6318.21	6510.82
ENSMUSG00000034243	Golgb1	TRUE	-0.120115	-1.71803	0.0857907	0.165315	6097.31	5270.13	6512.91	6282.99	6361	6797.06
ENSMUSG00000032294	Pkm	TRUE	-0.341568	-9.15631	5.37038e-20	1.01402e-18	5012.71	5151.1	4926.42	6279.76	6475.42	6356.62
ENSMUSG00000041688	Amot	TRUE	-0.244042	-4.82088	1.42928e-06	8.11764e-06	5590.83	4901.71	5626.57	6269	6366.58	6465.47
ENSMUSG00000001576	Ergic1	TRUE	-0.111604	-2.86951	0.00411106	0.0123744	5662.49	6055.72	6016.42	6264.7	6476.35	6416.08
ENSMUSG00000025153	Fasn	TRUE	-0.0525998	-0.918064	0.358585	0.501749	5608.5	5948.03	6552.24	6263.62	6103.32	6420.12
ENSMUSG00000001847	Rac1	TRUE	-0.0692894	-2.19794	0.0279531	0.065065	6038.41	6111.27	6123.93	6261.47	6469.84	6438.26
ENSMUSG00000026074	Map4k4	TRUE	0.344738	8.28865	1.14542e-16	1.7671e-15	7641.26	8266.25	8102.02	6250.71	6221.46	6432.21
ENSMUSG00000097640	RP24-448C16.2	FALSE	1.49191	2.74029	0.00613853	0.0176153	19.6307	14.7369	19.2302	6.45512	3.72097	9.07081
ENSMUSG00000035152	Ap2b1	TRUE	-0.11566	-2.77264	0.00556028	0.0161536	5663.47	5749.65	5964.85	6242.11	6080.99	6510.82
ENSMUSG00000039477	Tnrc18	TRUE	-0.277841	-5.32522	1.00829e-07	6.77198e-07	5154.05	4788.35	5637.06	6238.88	6200.07	6462.45
ENSMUSG00000024083	Pja2	TRUE	-0.17168	-4.60898	4.0465e-06	2.15016e-05	5633.04	5529.73	5809.26	6232.42	6374.02	6515.86
ENSMUSG00000032640	Chsy1	TRUE	-0.234603	-5.30185	1.14634e-07	7.62415e-07	5146.2	5178.31	5630.07	6217.36	6260.53	6302.2
ENSMUSG00000005103	Wdr1	TRUE	0.175288	3.75723	0.000171804	0.000703476	6600.83	7361.64	7178.97	6201.22	6020.53	6499.74
ENSMUSG00000029207	Apbb2	TRUE	-0.245049	-5.01586	5.27958e-07	3.19821e-06	5180.55	4945.92	5575.87	6194.77	6141.46	6284.05
ENSMUSG00000032324	Tspan3	TRUE	0.0418222	1.22249	0.221522	0.348817	6406.49	6215.56	6241.94	6187.24	6067.04	6073.41
ENSMUSG00000017144	Rnd3	TRUE	0.200128	4.6615	3.13917e-06	1.69993e-05	6953.21	7223.34	7783.84	6181.86	6426.11	6511.83
ENSMUSG00000037072	Sep15	TRUE	-0.114509	-2.48751	0.012864	0.0333912	6169.94	5810.86	5823.24	6177.55	6585.19	6509.82
ENSMUSG00000028059	Arhgef2	TRUE	-1.30717	-31.1748	2.3432e-213	1.35284e-210	2383.17	2676.44	2557.61	6171.1	6398.21	6264.9
ENSMUSG00000032320	Rcn2	TRUE	-0.147015	-4.58641	4.50932e-06	2.3759e-05	5515.25	5615.88	5509.44	6168.95	6138.67	6114.73
ENSMUSG00000054693	Adam10	TRUE	-0.288527	-6.86071	6.85167e-12	7.2481e-11	5213.92	4831.43	5140.57	6146.35	6232.62	6176.21
ENSMUSG00000022201	Zfr	TRUE	-0.289041	-7.40644	1.29737e-13	1.59892e-12	5026.45	5006	5138.82	6143.13	6029.83	6368.71
ENSMUSG00000033184	Tmed7	TRUE	-0.223712	-6.22972	4.67255e-10	4.1186e-09	5418.08	5227.06	5387.07	6140.97	6330.3	6252.81
ENSMUSG00000073639	Rab18	TRUE	-0.210127	-5.51772	3.43426e-08	2.45601e-07	5598.69	5291.67	5483.22	6135.6	6502.39	6304.21
ENSMUSG00000027002	Nckap1	TRUE	-0.214152	-5.88289	4.03175e-09	3.1786e-08	5299.32	5401.63	5408.05	6129.14	6241.93	6314.29
ENSMUSG00000032115	Hyou1	TRUE	-0.680961	-16.9874	1.01773e-64	8.72982e-63	3676.84	3906.41	4073.3	6117.31	6241.93	6333.44
ENSMUSG00000000693	Loxl3	TRUE	-0.0967878	-1.58991	0.111854	0.203422	5442.62	6518.23	6012.92	6107.62	6609.37	6496.71
ENSMUSG00000020152	Actr2	TRUE	-0.00883714	-0.249339	0.803098	0.875159	5887.26	5894.75	6199.1	6105.47	6152.62	5839.58
ENSMUSG00000029106	Add1	TRUE	0.120342	3.26043	0.00111245	0.0038539	6802.05	6856.05	6927.23	6096.86	6323.79	6515.86
ENSMUSG00000029777	Gars	TRUE	-1.08101	-25.8004	8.77515e-147	2.80264e-144	2947.55	3004.06	2976.3	6082.88	6344.25	6455.39
ENSMUSG00000041731	Pgm5	TRUE	0.270933	3.70874	0.00020829	0.000838914	6992.47	6496.7	7239.28	6076.42	5543.31	5564.44
ENSMUSG00000005124	Wisp1	TRUE	-0.300798	-6.29066	3.16112e-10	2.82449e-09	4942.04	5180.58	5110.85	6058.13	6141.46	6563.23
ENSMUSG00000027570	Col9a3	TRUE	0.710309	12.9588	2.09539e-38	8.76155e-37	9532.68	9688.93	9972.59	6044.15	6301.46	5496.91
ENSMUSG00000085042	2010001M06Rik	FALSE	1.44013	7.58881	3.22858e-14	4.15645e-13	152.138	155.304	134.611	41.9583	61.396	58.4563
ENSMUSG00000032875	Arhgef17	TRUE	0.0510252	1.10435	0.269441	0.40539	6205.27	5886.82	6466.58	6033.39	5768.43	6121.79
ENSMUSG00000021546	Hnrnpk	TRUE	-0.0296365	-0.79148	0.428664	0.57126	5800.88	6147.54	6054	6031.24	5998.2	6344.53
ENSMUSG00000076431	Sox4	TRUE	-0.198354	-3.48915	0.000484562	0.00181207	5636.97	4723.74	4886.21	6030.16	5852.15	5615.84
ENSMUSG00000022812	Gsk3b	TRUE	-0.358777	-7.66289	1.81798e-14	2.40015e-13	4838.98	4348.51	4919.42	6023.71	5907.97	6172.18
ENSMUSG00000019880	Rspo3	TRUE	-0.521894	-7.82358	5.13417e-15	7.10969e-14	4794.81	3785.11	4163.33	6018.33	6136.81	6147.99
ENSMUSG00000040731	Eif4h	TRUE	-0.0994076	-2.71075	0.00671304	0.0190761	5682.12	5749.65	5664.16	6001.11	6345.18	5962.54
ENSMUSG00000037470	Uggt1	TRUE	-0.429021	-9.57502	1.01838e-21	2.14403e-20	4654.45	4337.18	4761.21	5979.6	6051.23	6495.71
ENSMUSG00000079111	Kdelr2	TRUE	0.0017926	0.0513373	0.959057	0.976093	5920.63	6085.2	6004.18	5979.6	6021.46	5983.71
ENSMUSG00000024085	Man2a1	TRUE	-0.226514	-4.58778	4.47987e-06	2.36287e-05	5339.56	4743.01	5481.47	5960.23	6103.32	6158.07
ENSMUSG00000033880	Lgals3bp	TRUE	0.235055	1.43617	0.150954	0.257233	5772.42	7333.3	7700.81	5957	5869.83	5851.68
ENSMUSG00000056050	Mia3	TRUE	-0.255633	-5.81174	6.18251e-09	4.77887e-08	5179.57	4792.89	5337.24	5941.94	6099.6	6246.76
ENSMUSG00000051223	Bzw1	TRUE	-0.127568	-3.79627	0.000146887	0.000608086	5316	5410.7	5358.22	5931.18	5871.69	5768.03
ENSMUSG00000074305	C230081A13Rik	TRUE	-0.224127	-3.86142	0.00011273	0.000475336	5314.04	4893.78	5688.63	5919.35	6066.11	6591.45
ENSMUSG00000012848	Rps5	TRUE	-0.224445	-4.67768	2.90133e-06	1.57683e-05	5225.7	4959.53	4950.02	5916.12	6075.41	5690.42
ENSMUSG00000055435	Maf	TRUE	-0.00282786	-0.0656976	0.947619	0.970373	5561.39	5507.06	5852.96	5907.51	5489.36	5567.46
ENSMUSG00000031422	Morf4l2	TRUE	-0.0829913	-2.32982	0.0198157	0.0484126	5807.75	5751.92	5759.43	5906.44	6097.74	6338.48
ENSMUSG00000026103	Gls	TRUE	-0.200949	-3.94344	8.03215e-05	0.000346766	5521.14	4762.28	5045.3	5901.06	5953.55	5770.04
ENSMUSG00000020349	Ppp2ca	TRUE	-0.0836322	-2.50209	0.0123462	0.032231	5602.61	5628.35	5590.73	5895.68	6077.27	5848.66
ENSMUSG00000022957	Itsn1	TRUE	-0.38845	-10.1292	4.09803e-24	9.93788e-23	4340.36	4548.03	4554.93	5892.45	5740.53	5965.57
ENSMUSG00000029657	Hsph1	TRUE	-0.623382	-12.7302	4.01649e-37	1.61207e-35	3539.42	4071.91	4094.28	5874.16	6037.27	6118.76
ENSMUSG00000029838	Ptn	TRUE	0.96194	13.3627	9.98939e-41	4.44958e-39	12139.6	10780.6	11394.7	5865.56	5731.22	6021
ENSMUSG00000008763	Man1a2	TRUE	-0.00352977	-0.085393	0.931949	0.960552	5955.96	5518.39	5979.71	5859.1	5683.78	5964.56
ENSMUSG00000019132	BC005537	TRUE	-0.188815	-4.75058	2.02837e-06	1.12686e-05	4951.85	5020.74	5071.52	5856.95	5569.36	5725.7
ENSMUSG00000042284	Itga1	TRUE	-0.37459	-7.3176	2.52441e-13	3.04369e-12	4698.62	4113.86	4766.46	5854.8	5801.92	5961.54
ENSMUSG00000018293	Pfn1	TRUE	0.210365	4.00813	6.12006e-05	0.000270599	6365.27	7246.01	7009.39	5852.65	6013.09	5953.47
ENSMUSG00000053263	Gm12592	FALSE	1.38438	2.3975	0.0165075	0.0413955	14.7231	11.3361	13.1115	4.30342	3.72097	7.05507
ENSMUSG00000039234	Sec24d	TRUE	0.139082	3.55804	0.000373632	0.00143076	6267.11	6470.62	6810.1	5852.65	5818.67	6085.5
ENSMUSG00000024811	Tnks2	TRUE	-0.193145	-4.7405	2.1319e-06	1.18132e-05	5117.73	4918.72	5290.04	5839.74	5720.99	5971.61
ENSMUSG00000071659	Hnrnpul2	TRUE	-0.0258817	-0.674148	0.500217	0.637958	5976.58	5822.2	6027.78	5832.2	6178.67	6138.92
ENSMUSG00000083307	AA414768	FALSE	1.37584	11.9958	3.73608e-33	1.30728e-31	432.858	374.09	349.639	148.468	152.56	144.125
ENSMUSG00000042406	Atf4	TRUE	-0.911087	-17.2089	2.27561e-66	2.03328e-64	2893.57	3200.17	3328.57	5830.05	6138.67	5750.89
ENSMUSG00000018567	Gabarap	TRUE	0.0134066	0.321445	0.747873	0.838098	6062.95	5753.05	5950.86	5830.05	6036.34	5737.79
ENSMUSG00000001472	Tcf25	TRUE	-0.190373	-5.7413	9.39507e-09	7.10834e-08	5017.62	5187.38	5151.94	5827.9	5907.97	5784.15
ENSMUSG00000014355	Anapc1	TRUE	-0.0635818	-1.30785	0.190925	0.310204	5655.61	5135.23	5849.47	5813.92	5713.55	5873.85
ENSMUSG00000041740	Rnf10	TRUE	-0.292627	-8.16496	3.2155e-16	4.82196e-15	4606.35	4835.96	4859.99	5807.46	5814.95	5896.02
ENSMUSG00000022995	Enah	TRUE	0.24893	5.54463	2.94573e-08	2.12486e-07	6994.43	6411.67	6985.79	5806.38	5636.34	5725.7
ENSMUSG00000037503	Fam168b	TRUE	-0.071358	-1.87208	0.061196	0.125563	5424.95	5474.18	5464.86	5806.38	5709.83	5678.33
ENSMUSG00000027479	Mapre1	TRUE	-0.0697773	-1.96984	0.0488571	0.104353	5686.04	5536.53	5602.1	5788.09	5933.09	5937.35
ENSMUSG00000025255	Zfhx4	TRUE	-0.191637	-1.58928	0.111997	0.203559	5628.13	4254.42	5931.63	5785.94	6120.99	6158.07
ENSMUSG00000028249	Sdcbp	TRUE	-0.131725	-3.54184	0.000397341	0.00151344	5052.95	4937.99	5185.15	5781.64	5436.34	5420.31
ENSMUSG00000035357	Pdzrn3	TRUE	-0.594569	-13.5825	5.08376e-42	2.34807e-40	3697.45	3820.25	3895.86	5777.34	5524.71	5937.35
ENSMUSG00000017760	Ctsa	TRUE	-0.149232	-4.53219	5.83754e-06	3.03209e-05	5115.77	5292.81	5221.86	5767.65	5713.55	5850.67
ENSMUSG00000028557	Rnf11	TRUE	-0.212133	-5.04835	4.45632e-07	2.72037e-06	4773.21	4781.55	5104.73	5762.27	5527.5	5701.51
ENSMUSG00000029076	Sdf4	TRUE	-0.0757211	-2.25591	0.0240764	0.0574033	5416.12	5538.8	5506.82	5760.12	5746.11	5841.6
ENSMUSG00000032997	Chpf	TRUE	0.239797	5.72717	1.02121e-08	7.70706e-08	6355.45	6935.4	7135.26	5748.29	5716.34	5835.55
ENSMUSG00000009575	Cbx5	TRUE	-0.168946	-3.66051	0.000251717	0.000998291	5503.48	4868.84	5214.87	5740.76	5882.85	5906.1
ENSMUSG00000034290	Nek9	TRUE	-0.0398449	-1.08365	0.278519	0.415414	5428.88	5474.18	5575.87	5737.53	5656.8	5549.32
ENSMUSG00000010277	2610507B11Rik	TRUE	-0.0979182	-2.38626	0.0170206	0.0424977	5147.18	5301.87	5411.54	5720.32	5458.66	5800.28
ENSMUSG00000006333	Rps9	TRUE	-0.0873285	-1.60612	0.108247	0.198309	5281.65	5937.83	5879.18	5716.01	6516.35	5927.27
ENSMUSG00000007892	Rplp1	TRUE	-0.166519	-2.27351	0.0229952	0.0551407	5246.31	5526.33	5516.43	5710.63	6755.42	5812.37
ENSMUSG00000033209	Ttc28	TRUE	-0.0623376	-1.02867	0.303636	0.443978	5621.26	4925.52	5997.19	5703.1	5686.57	5895.02
ENSMUSG00000060671	Atp8b2	TRUE	0.233558	6.06439	1.32454e-09	1.1089e-08	6456.55	6827.71	6810.1	5695.57	5579.59	5816.4
ENSMUSG00000006304	Arpc2	TRUE	-0.0239119	-0.565522	0.571719	0.700292	5272.82	5861.88	5783.03	5683.74	5710.76	5803.3
ENSMUSG00000031924	Cyb5b	TRUE	-0.0338485	-1.0612	0.288597	0.426988	5429.86	5535.4	5509.44	5668.67	5593.55	5603.74
ENSMUSG00000042613	Pbxip1	TRUE	-0.206311	-5.48257	4.19187e-08	2.95065e-07	5095.16	4754.34	4945.65	5663.3	5800.06	5610.8
ENSMUSG00000048368	Omd	TRUE	-0.500513	-9.24715	2.30556e-20	4.45416e-19	4017.43	3830.45	4026.1	5661.14	5683.78	5457.6
ENSMUSG00000029119	Man2b2	TRUE	0.0311357	0.627734	0.530178	0.664704	5832.29	6026.25	6159.77	5660.07	5604.71	6370.73
ENSMUSG00000058056	Palld	TRUE	0.0824186	1.66361	0.0961905	0.18067	5677.21	5855.07	6379.17	5656.84	5523.78	5742.83
ENSMUSG00000023972	Ptk7	TRUE	-0.387957	-11.0653	1.84771e-28	5.47062e-27	4444.4	4486.81	4474.51	5654.69	5901.46	5981.69
ENSMUSG00000021133	4933426M11Rik	TRUE	-0.265873	-7.61926	2.55139e-14	3.31593e-13	4631.87	4693.13	4793.55	5625.64	5512.62	5842.61
ENSMUSG00000022272	Myo10	TRUE	0.009028	0.182517	0.855177	0.909527	5704.69	5322.28	6151.9	5611.65	5614.94	5855.71
ENSMUSG00000022016	Akap11	TRUE	-0.343523	-6.79367	1.09313e-11	1.13872e-10	4434.58	4071.91	4702.65	5609.5	5504.24	5660.18
ENSMUSG00000009470	Tnpo1	TRUE	-0.406125	-9.1156	7.8236e-20	1.4607e-18	4283.43	4032.24	4503.35	5603.05	5606.57	5790.2
ENSMUSG00000037236	Matr3	TRUE	-0.20016	-5.85772	4.6927e-09	3.68036e-08	4982.28	4873.37	5008.58	5585.83	5774.94	5717.63
ENSMUSG00000097101	CT030159.1	FALSE	1.32887	5.2873	1.24138e-07	8.22706e-07	71.6522	60.0811	64.6833	27.9722	19.5351	31.2439
ENSMUSG00000019087	Atp6ap1	TRUE	-0.267548	-7.6209	2.51913e-14	3.27683e-13	4583.78	4715.8	4530.45	5583.68	5565.64	5491.87
ENSMUSG00000070923	Klhl9	TRUE	0.030069	0.667147	0.504678	0.642446	5848	5329.08	6030.4	5581.53	5704.25	5576.53
ENSMUSG00000034024	Cct2	TRUE	-0.355689	-9.52937	1.58242e-21	3.28543e-20	4477.77	4623.98	4403.71	5580.45	5824.25	5865.79
ENSMUSG00000006005	Tpr	TRUE	-0.3206	-6.44923	1.12418e-10	1.05469e-09	4579.85	4200.01	4795.3	5574	5600.99	5790.2
ENSMUSG00000055204	Ankrd17	TRUE	-0.327712	-5.86931	4.37609e-09	3.4363e-08	4454.21	4062.84	4879.22	5563.24	5508.9	5753.92
ENSMUSG00000052698	Tln2	TRUE	-0.232063	-4.25765	2.06586e-05	9.86655e-05	4916.52	4345.11	5096.87	5557.86	5601.92	5715.62
ENSMUSG00000021838	Samd4	TRUE	-0.301861	-7.45677	8.86717e-14	1.10186e-12	4283.43	4423.33	4673.8	5549.26	5479.13	5473.73
ENSMUSG00000096965	RP23-251I6.1	FALSE	1.31609	4.70205	2.57561e-06	1.40744e-05	55.9476	47.6114	50.6977	21.5171	22.3258	18.1416
ENSMUSG00000027706	Sec62	TRUE	-0.191321	-5.2747	1.32974e-07	8.78165e-07	4956.76	4910.78	4822.4	5541.72	5524.71	5704.53
ENSMUSG00000028760	Eif4g3	TRUE	-0.14439	-3.37615	0.000735088	0.00264868	4912.59	5132.97	5234.97	5534.19	5643.78	5711.59
ENSMUSG00000005413	Hmox1	TRUE	-0.427258	-6.41283	1.42839e-10	1.32437e-09	3664.08	4627.38	4472.76	5532.04	5852.15	5775.08
ENSMUSG00000027254	Map1a	TRUE	0.175153	2.873	0.00406599	0.0122485	6503.66	5770.05	6811.85	5525.59	5565.64	5819.43
ENSMUSG00000019920	Lims1	TRUE	-0.188711	-4.61719	3.8897e-06	2.07419e-05	4719.23	4690.86	5176.41	5516.98	5509.83	5609.79
ENSMUSG00000022200	Golph3	TRUE	0.0490143	1.26186	0.207	0.330913	5501.51	5793.86	5988.45	5497.61	5558.2	5653.13
ENSMUSG00000024012	Mtch1	TRUE	0.0953486	2.67184	0.0075437	0.0211069	5817.57	5698.64	5741.95	5496.54	5470.76	5188.5
ENSMUSG00000063358	Mapk1	TRUE	-0.189743	-5.12935	2.90752e-07	1.82678e-06	4734.93	4763.41	4851.25	5485.78	5390.75	5493.89
ENSMUSG00000037235	Mxd4	TRUE	0.35871	9.26079	2.02917e-20	3.94048e-19	7306.56	6883.25	6799.61	5469.64	5520.06	5377.98
ENSMUSG00000028788	Ptp4a2	TRUE	-0.174973	-4.44557	8.76599e-06	4.42902e-05	4785.97	4990.13	4863.48	5468.57	5589.83	5463.65
ENSMUSG00000025969	Nrp2	TRUE	-0.29291	-5.76088	8.36768e-09	6.36308e-08	4440.47	4811.02	4823.27	5458.88	5683.78	6098.61
ENSMUSG00000020594	Pum2	TRUE	-0.256752	-7.29376	3.01417e-13	3.61965e-12	4540.59	4455.07	4507.72	5453.5	5403.78	5279.21
ENSMUSG00000093930	Hmgcs1	TRUE	0.0182871	0.338267	0.735162	0.827622	5006.82	5569.41	5977.96	5453.5	5424.24	5471.71
ENSMUSG00000007850	Hnrnph1	TRUE	0.135908	3.06813	0.002154	0.00697449	5871.55	6492.16	5734.96	5448.12	5520.99	5490.86
ENSMUSG00000097791	CT030740.1	FALSE	1.29905	2.59453	0.00947209	0.025721	15.7046	21.5385	17.482	8.60683	4.65121	9.07081
ENSMUSG00000022884	Eif4a2	TRUE	-0.132665	-2.58416	0.00976157	0.0263782	5101.05	4745.27	4472.76	5447.05	5280.06	4968.79
ENSMUSG00000034109	Golim4	TRUE	-0.173862	-5.00437	5.60445e-07	3.38001e-06	5010.74	4763.41	4970.12	5443.82	5521.92	5673.29
ENSMUSG00000035202	Lars2	TRUE	0.421986	1.86521	0.0621521	0.127003	4835.05	7006.82	5807.51	5443.82	4431.67	3297.74
ENSMUSG00000066357	Wdr6	TRUE	0.223023	5.06677	4.04628e-07	2.4842e-06	6513.48	5791.59	6398.4	5422.3	5400.06	5210.67
ENSMUSG00000006373	Pgrmc1	TRUE	-0.16698	-4.28652	1.81493e-05	8.74603e-05	4986.21	4899.44	4945.65	5421.23	5667.97	5560.4
ENSMUSG00000021242	Npc2	TRUE	0.240072	5.41016	6.29675e-08	4.33092e-07	6404.53	6290.38	6362.56	5420.15	5366.57	5350.77
ENSMUSG00000028469	Npr2	TRUE	-0.198551	-4.58292	4.58517e-06	2.41332e-05	4671.13	4820.09	4566.29	5419.08	5187.96	5521.1
ENSMUSG00000027630	Tbl1xr1	TRUE	0.287079	5.49863	3.82754e-08	2.71785e-07	6566.48	6051.19	6720.94	5408.32	5146.1	5302.39
ENSMUSG00000068267	Cenpb	TRUE	-0.0459392	-1.14713	0.251328	0.384536	5151.1	5154.51	5220.99	5398.64	5518.2	5111.9
ENSMUSG00000025246	Tbl1x	TRUE	-0.413535	-10.4403	1.62309e-25	4.28193e-24	4114.6	3892.8	4172.94	5388.95	5364.71	5480.78
ENSMUSG00000027340	Slc23a2	TRUE	-0.370687	-7.6059	2.82919e-14	3.66744e-13	4139.14	3831.59	4435.17	5377.12	5334.01	5343.71
ENSMUSG00000060227	Casc4	TRUE	-0.414122	-11.0662	1.8291e-28	5.42622e-27	4044.91	4023.17	4207.91	5373.89	5443.78	5546.29
ENSMUSG00000020917	Acly	TRUE	-0.0787707	-1.73708	0.0823727	0.15994	4800.7	5083.09	5262.95	5372.82	5258.66	5368.91
ENSMUSG00000047888	Tnrc6b	TRUE	-0.158381	-2.04681	0.0406767	0.0897439	5292.45	4152.4	5303.15	5368.51	5507.97	5590.64
ENSMUSG00000001300	Efnb2	TRUE	-0.659581	-11.5826	5.05053e-31	1.64454e-29	3585.55	2957.58	3480.66	5365.28	5244.71	5238.9
ENSMUSG00000059248	Sept9	TRUE	0.309645	7.38485	1.52625e-13	1.87637e-12	6250.43	7060.1	6640.52	5358.83	5396.34	5335.65
ENSMUSG00000023886	Smoc2	TRUE	-0.290931	-7.05999	1.66514e-12	1.87653e-11	4464.03	4247.62	4297.94	5356.68	5248.43	5314.49
ENSMUSG00000022636	Alcam	TRUE	-0.618379	-13.7052	9.45194e-43	4.53301e-41	3665.06	3491.51	3671.21	5352.37	5529.36	5745.85
ENSMUSG00000091243	Vgll3	TRUE	0.301311	7.95218	1.83259e-15	2.60996e-14	6526.24	6276.78	6762.9	5350.22	5246.57	5290.3
ENSMUSG00000027189	Trim44	TRUE	-0.137905	-3.70529	0.000211153	0.00084908	4978.35	4673.86	4827.64	5350.22	5299.59	5288.28
ENSMUSG00000050565	Tor1aip2	TRUE	0.015267	0.281054	0.778669	0.859704	5297.35	5442.44	5574.12	5344.84	5426.1	5371.93
ENSMUSG00000024392	Bag6	TRUE	-0.0845821	-2.31774	0.0204634	0.0498096	4954.8	5053.61	5191.27	5338.39	5480.99	5299.37
ENSMUSG00000027878	Notch2	TRUE	-0.325925	-5.02896	4.93158e-07	3.00316e-06	4621.07	3906.41	4764.71	5333.01	5407.5	5931.3
ENSMUSG00000033955	Tnks1bp1	TRUE	0.218175	5.53956	3.03224e-08	2.18202e-07	6115.96	6372	6660.63	5331.93	5617.73	5512.03
ENSMUSG00000052681	Rap1b	TRUE	-0.0760805	-1.98932	0.0466658	0.100445	4826.22	4907.38	5094.24	5317.95	5000.05	5321.54
ENSMUSG00000051853	Arf3	TRUE	-0.0714051	-1.84888	0.0644748	0.130965	4941.06	5331.35	5283.05	5315.79	5500.52	5524.12
ENSMUSG00000035847	Ids	TRUE	-0.672986	-15.2673	1.26384e-52	8.1774e-51	3503.1	3153.69	3443.07	5309.34	5421.45	5384.03
ENSMUSG00000030754	Copb1	TRUE	-0.13684	-4.05923	4.92357e-05	0.000221546	4815.42	4758.88	4952.64	5308.26	5277.27	5394.11
ENSMUSG00000030057	Cnbp	TRUE	-0.0400076	-0.988371	0.322971	0.464468	5185.46	5609.08	5274.31	5298.58	5651.22	5559.4
ENSMUSG00000027803	Wwtr1	TRUE	0.0512536	1.07509	0.282334	0.419491	4997.98	5794.99	5686.01	5292.13	5299.59	5309.45
ENSMUSG00000031751	Amfr	TRUE	-0.302048	-8.53885	1.3556e-17	2.22879e-16	4198.03	4268.03	4262.98	5287.82	5277.27	5128.03
ENSMUSG00000058230	Grlf1	TRUE	-0.043711	-1.00499	0.314904	0.455836	5120.68	5135.23	5357.35	5280.29	5334.94	5481.79
ENSMUSG00000024294	Mib1	TRUE	-0.246539	-5.08986	3.58323e-07	2.21806e-06	4498.38	4212.48	4831.14	5273.84	5374.94	5428.37
ENSMUSG00000035901	Dennd5a	TRUE	-0.114268	-2.6705	0.00757383	0.0211833	4789.9	4712.4	4859.11	5272.76	4966.56	5312.47
ENSMUSG00000022680	Pdxdc1	TRUE	-0.0826404	-2.16533	0.0303621	0.0699562	4818.36	4961.79	4948.27	5255.55	5025.17	5318.52
ENSMUSG00000031591	Asah1	TRUE	-0.253224	-6.89491	5.38976e-12	5.76663e-11	4625.98	4440.33	4464.89	5250.17	5298.66	5579.55
ENSMUSG00000048332	Lhfp	TRUE	-0.0400575	-1.03218	0.301987	0.442343	5373.91	5295.07	5249.83	5248.02	5602.85	5511.02
ENSMUSG00000000278	Scpep1	TRUE	0.0130981	0.34074	0.733299	0.826269	5384.71	5436.77	5352.98	5245.86	5247.5	5533.19
ENSMUSG00000032334	Loxl1	TRUE	0.304581	6.49032	8.56547e-11	8.12745e-10	6090.44	6615.72	6497.17	5242.64	5165.64	5139.12
ENSMUSG00000040310	Alx4	TRUE	-0.0188314	-0.485829	0.627089	0.745661	5103.99	5100.09	5313.64	5238.33	5211.22	5277.19
ENSMUSG00000028639	Ybx1	TRUE	-0.210606	-4.23629	2.27246e-05	0.000107813	4796.77	4770.21	4665.06	5237.26	5742.39	5483.81
ENSMUSG00000037234	Hook3	TRUE	-0.102778	-1.88692	0.0591717	0.122126	5113.81	4392.72	5157.18	5237.26	5140.52	5380
ENSMUSG00000028757	Ddost	TRUE	0.0598884	1.5519	0.120687	0.216262	5609.48	5446.98	5642.3	5234.03	5417.73	5369.92
ENSMUSG00000027177	Hipk3	TRUE	-0.186165	-4.14108	3.45668e-05	0.00015946	4679.97	4298.63	4790.06	5216.82	5139.59	5320.53
ENSMUSG00000059495	Arhgef12	TRUE	-0.148295	-2.66245	0.00775749	0.0215964	4852.72	4458.47	5019.07	5215.74	5121.91	5552.34
ENSMUSG00000021248	Tmed10	TRUE	-0.301782	-8.08336	6.30065e-16	9.27246e-15	4183.31	4112.72	4186.93	5215.74	5131.22	5044.38
ENSMUSG00000017776	Crk	TRUE	-0.134541	-3.85943	0.00011365	0.000478883	4601.44	4856.37	4842.5	5214.66	5227.96	5254.01
ENSMUSG00000019802	Sec63	TRUE	-0.355044	-9.96519	2.16456e-23	5.01422e-22	4124.42	4150.13	4145.85	5202.83	5255.87	5426.36
ENSMUSG00000031012	Cask	TRUE	-0.0584432	-1.17953	0.238187	0.369361	5064.73	4886.97	5566.26	5201.75	5526.57	5438.45
ENSMUSG00000037331	Larp1	TRUE	-0.266909	-7.26409	3.7556e-13	4.47068e-12	4255.94	4492.48	4486.75	5195.3	5369.36	5356.82
ENSMUSG00000036181	Hist1h1c	TRUE	-0.383659	-9.82735	8.58511e-23	1.9092e-21	3839.77	4035.64	4135.36	5180.24	5245.64	5245.95
ENSMUSG00000005873	Reep5	TRUE	-0.144635	-4.22058	2.43673e-05	0.000114938	4631.87	4750.94	4775.2	5171.63	5336.8	5140.12
ENSMUSG00000059263	Usp47	TRUE	-0.143613	-3.65237	0.000259828	0.00102693	4779.1	4555.96	4780.44	5167.33	5189.82	5241.92
ENSMUSG00000026817	Ak1	TRUE	0.162986	4.25957	2.04819e-05	9.79465e-05	6017.8	5734.91	5877.44	5164.1	5354.48	5228.82
ENSMUSG00000078429	Ctdsp2	TRUE	-0.0120933	-0.328315	0.742673	0.833578	5061.78	4977.66	4899.32	5156.57	4970.29	4938.55
ENSMUSG00000053110	Yap1	TRUE	-0.00919147	-0.248462	0.803777	0.87563	5245.33	5183.98	5276.93	5151.19	5411.22	5242.93
ENSMUSG00000089715	Cbx6	TRUE	0.265706	6.67027	2.55341e-11	2.56898e-10	6393.73	5972.97	6085.47	5147.96	5273.54	4927.46
ENSMUSG00000024073	Birc6	TRUE	-0.218578	-1.88257	0.0597592	0.123067	4572.98	3935.88	5297.91	5147.96	5246.57	5675.3
ENSMUSG00000085867	Gm5834	FALSE	1.21728	2.36274	0.0181403	0.0448015	14.7231	14.7369	23.6007	5.37927	7.44194	10.0787
ENSMUSG00000033004	Mycbp2	TRUE	-0.0583662	-0.555649	0.578451	0.705608	5481.88	4231.75	5513.81	5136.13	5122.84	5601.73
ENSMUSG00000074748	Atxn7l3b	TRUE	-0.148997	-3.67687	0.000236117	0.000941394	4572	4410.86	4371.37	5128.6	4974.94	4704.73
ENSMUSG00000021484	Lman2	TRUE	-0.223299	-6.43067	1.2704e-10	1.18742e-09	4340.36	4430.13	4425.56	5116.76	5190.75	5095.78
ENSMUSG00000026932	Nacc2	TRUE	-0.118185	-2.99689	0.00272753	0.00859784	4747.69	4443.73	4660.69	5104.93	5017.73	4919.4
ENSMUSG00000062014	Gmfb	TRUE	-0.149658	-4.27555	1.90665e-05	9.16155e-05	4559.24	4629.65	4701.77	5095.24	5135.87	5179.43
ENSMUSG00000034993	Vat1	TRUE	-0.00675044	-0.189619	0.849608	0.905447	5224.72	5269	5166.79	5095.24	5273.54	5359.84
ENSMUSG00000034075	Zdhhc5	TRUE	-0.138997	-3.58437	0.00033789	0.00130555	4455.2	4718.07	4778.7	5089.87	5084.7	5189.51
ENSMUSG00000028426	Rad23b	TRUE	-0.145895	-3.7514	0.00017585	0.000719065	4696.65	4765.68	4754.22	5088.79	5382.38	5254.01
ENSMUSG00000049354	Dcaf7	TRUE	-0.521844	-12.3189	7.16962e-35	2.67055e-33	3760.27	3426.89	3660.72	5088.79	5203.78	5291.3
ENSMUSG00000020114	Cand1	TRUE	-0.107333	-2.43497	0.0148932	0.0379047	4874.31	4689.73	4947.4	5076.96	5246.57	5312.47
ENSMUSG00000001870	Ltbp1	TRUE	0.141536	3.15	0.00163272	0.00544036	5747.88	5759.85	6109.07	5075.88	5353.55	5543.27
ENSMUSG00000038366	Lasp1	TRUE	0.236381	5.92266	3.16773e-09	2.53604e-08	5929.46	6114.67	6249.8	5069.42	5187.03	5273.16
ENSMUSG00000024098	Twsg1	TRUE	0.123005	3.30792	0.000939902	0.00331506	5632.06	5248.59	5526.92	5066.2	5001.91	5006.08
ENSMUSG00000030451	Herc2	TRUE	-0.245468	-2.01265	0.0441518	0.0960386	4672.11	3764.7	5104.73	5065.12	5334.94	5657.16
ENSMUSG00000000031	H19	FALSE	1.19823	23.7525	1.03616e-124	2.16025e-122	49828.7	53951.7	49539.5	21894.7	23132.3	21786.1
ENSMUSG00000006169	Clint1	TRUE	-0.160497	-4.33369	1.46628e-05	7.1765e-05	4440.47	4476.61	4731.49	5058.67	5091.22	5111.9
ENSMUSG00000003131	Pafah1b2	TRUE	-0.181196	-4.91642	8.81413e-07	5.17034e-06	4388.45	4549.16	4640.59	5058.67	5040.05	5299.37
ENSMUSG00000031486	Gpr124	TRUE	0.469094	10.1567	3.09254e-24	7.59773e-23	7066.08	6993.21	7223.55	5057.59	5115.4	5203.62
ENSMUSG00000030835	Nomo1	TRUE	-0.303476	-7.47694	7.60716e-14	9.48431e-13	4087.12	4247.62	4349.51	5056.51	5255.87	5341.7
ENSMUSG00000029713	Gnb2	TRUE	0.0689486	1.77816	0.075377	0.148728	5330.73	5369.89	5162.42	5054.36	5128.43	4934.52
ENSMUSG00000036550	Cnot1	TRUE	-0.282066	-5.22513	1.74036e-07	1.13044e-06	4233.37	3814.58	4325.91	5050.06	4834.47	5172.38
ENSMUSG00000044864	Ankrd50	TRUE	-0.0325065	-0.600479	0.548187	0.68035	5054.91	4402.93	5126.59	5050.06	4925.63	4951.65
ENSMUSG00000058690	Ccser2	TRUE	0.0471418	1.13195	0.257656	0.391702	5174.66	4960.66	5173.79	5031.77	4852.14	4939.56
ENSMUSG00000050953	Gja1	TRUE	0.207529	4.55564	5.22268e-06	2.72309e-05	6231.78	5716.77	5883.56	5030.69	5204.71	5208.66
ENSMUSG00000086111	Gm15326	FALSE	1.18539	3.31317	0.000922447	0.00325808	31.4092	26.0729	48.0754	13.9861	19.5351	13.1023
ENSMUSG00000045763	Basp1	TRUE	-0.214707	-4.23218	2.31432e-05	0.000109591	4185.27	4424.46	4539.19	5012.4	5158.19	5088.72
ENSMUSG00000031250	Tnmd	TRUE	0.977898	19.1908	4.41784e-82	4.8406e-80	10319.9	9216.22	9864.2	5008.1	5050.29	4871.02
ENSMUSG00000031274	Col4a5	TRUE	0.270746	7.12579	1.03487e-12	1.18493e-11	6242.57	5951.43	6270.78	5004.87	5206.57	5096.79
ENSMUSG00000030062	Rpn1	TRUE	-0.139099	-3.67138	0.000241246	0.000960567	4545.5	4697.66	4714.89	5002.72	5066.1	5301.38
ENSMUSG00000036103	Colec12	TRUE	0.364096	8.3923	4.7673e-17	7.56469e-16	6389.8	6783.5	6487.56	4990.89	5002.84	5278.2
ENSMUSG00000015846	Rxra	TRUE	-0.219211	-5.2806	1.28765e-07	8.51491e-07	4447.34	4116.12	4339.02	4984.43	5106.1	4934.52
ENSMUSG00000043252	Tmem64	TRUE	-0.615991	-12.0251	2.62128e-33	9.23663e-32	3222.38	2939.44	3126.65	4972.6	4717.26	4554.55
ENSMUSG00000027208	Fgf7	TRUE	-0.0267043	-0.529145	0.596705	0.720689	4633.83	5215.72	5362.59	4971.52	5298.66	5224.79
ENSMUSG00000027006	Dnajc10	TRUE	0.230022	6.44745	1.13746e-10	1.06582e-09	5772.42	5665.76	5834.61	4962.91	4804.7	4965.76
ENSMUSG00000018379	Srsf1	TRUE	0.0140124	0.389616	0.69682	0.797436	4899.83	5108.03	4845.13	4960.76	4874.47	4868
ENSMUSG00000038886	Man2a2	TRUE	0.385274	9.11456	7.89926e-20	1.47299e-18	6422.19	6093.13	6522.52	4952.16	4739.59	4892.19
ENSMUSG00000042520	Ubap2l	TRUE	-0.142432	-2.91115	0.00360102	0.0109806	4715.3	4487.95	4859.11	4952.16	5091.22	5483.81
ENSMUSG00000020869	Lrrc59	TRUE	-0.0469801	-1.19057	0.233821	0.363945	4707.45	5024.14	5059.28	4951.08	5095.87	5231.84
ENSMUSG00000021577	Sdha	TRUE	-0.14748	-3.44109	0.000579383	0.0021306	4480.71	4465.27	4550.56	4950	4935.87	5065.54
ENSMUSG00000015002	Efr3a	TRUE	-0.388963	-10.3636	3.63038e-25	9.37962e-24	3839.77	3696.69	3842.54	4937.09	5001.91	4966.77
ENSMUSG00000025613	Cct8	TRUE	-0.150145	-4.47265	7.72549e-06	3.93777e-05	4466.97	4566.16	4527.83	4926.34	4999.12	5119.97
ENSMUSG00000033763	Mtss1l	TRUE	0.311942	7.73766	1.0126e-14	1.36815e-13	6190.55	6138.48	6461.33	4923.11	5078.19	5138.11
ENSMUSG00000004040	Stat3	TRUE	0.109547	2.78995	0.00527165	0.0153925	5201.16	5583.01	5575	4906.97	5057.73	5195.56
ENSMUSG00000038393	Txnip	TRUE	-0.373033	-6.55218	5.67039e-11	5.49505e-10	4198.03	3967.62	3983.27	4906.97	5254.01	5571.49
ENSMUSG00000040785	Ttc3	TRUE	-0.152976	-3.35419	0.000795965	0.00285025	4491.51	4285.03	4440.42	4904.82	4837.26	4957.7
ENSMUSG00000026051	1500015O10Rik	TRUE	0.366247	10.1251	4.27556e-24	1.03517e-22	6363.3	6389	6297	4903.74	5007.49	4863.97
ENSMUSG00000097331	AC144852.1	FALSE	1.16099	2.98826	0.00280573	0.00880553	26.5015	36.2754	30.5934	8.60683	20.4653	12.0944
ENSMUSG00000067818	Myl9	TRUE	0.959757	25.5587	4.39797e-144	1.32036e-141	9158.72	9538.16	9825.74	4899.44	4923.77	4842.8
ENSMUSG00000025007	Aldh18a1	TRUE	-0.842228	-19.3386	2.54274e-83	2.86986e-81	2642.3	2609.56	2627.54	4897.29	4606.56	4627.12
ENSMUSG00000024360	Etf1	TRUE	-0.0923053	-2.1649	0.0303951	0.0700216	4273.61	4694.26	4810.16	4888.68	4909.82	4891.18
ENSMUSG00000032050	Rdx	TRUE	-0.0214805	-0.592051	0.553817	0.684677	4816.4	4782.68	4836.39	4873.62	4886.56	4893.2
ENSMUSG00000030795	Fus	TRUE	0.0760488	1.64484	0.100003	0.186246	4971.48	5326.81	4806.67	4858.56	4891.21	4570.68
ENSMUSG00000023191	Leprel2	TRUE	0.469037	13.9383	3.70863e-44	1.84338e-42	6802.05	6901.39	6894.89	4855.33	5048.43	4973.83
ENSMUSG00000042700	Sipa1l1	TRUE	-0.111734	-2.25283	0.0242696	0.0577631	4629.91	4638.72	4821.53	4854.25	5021.45	5350.77
ENSMUSG00000040998	Npnt	TRUE	0.713239	9.22344	2.87712e-20	5.52281e-19	7676.6	7734.59	8182.43	4848.87	4634.47	4909.32
ENSMUSG00000018363	Smurf2	TRUE	-0.0968274	-2.49031	0.0127633	0.0332084	4348.21	4542.36	4659.82	4846.72	4893.08	4753.1
ENSMUSG00000016921	Srsf6	TRUE	0.0390579	1.01688	0.309209	0.450154	4956.76	5111.43	4711.39	4840.27	4807.49	4727.91
ENSMUSG00000025555	Farp1	TRUE	-0.287197	-6.72086	1.80655e-11	1.84981e-10	3917.31	3950.62	4185.18	4838.12	4796.33	5080.66
ENSMUSG00000026924	Sec16a	TRUE	-0.102086	-1.84432	0.0651359	0.132004	4513.11	4229.48	4989.35	4818.75	4846.56	5083.68
ENSMUSG00000038074	Fkbp14	TRUE	0.0925965	2.51275	0.0119795	0.0314377	5101.05	4952.72	5244.59	4807.99	4868.89	4676.51
ENSMUSG00000022377	Asap1	TRUE	-0.151883	-3.2646	0.0010962	0.00380376	4338.39	4206.81	4542.69	4805.84	4654.93	5088.72
ENSMUSG00000021282	Eif5	TRUE	-0.325411	-9.77607	1.4264e-22	3.12579e-21	3781.86	3846.32	3777.85	4800.46	4765.63	4722.87
ENSMUSG00000015755	Tab2	TRUE	-0.152377	-3.25636	0.00112849	0.00389869	4368.82	3982.36	4439.54	4787.55	4639.12	4800.47
ENSMUSG00000074071	Fam169b	FALSE	1.14361	3.0462	0.00231751	0.00745248	26.5015	30.6074	20.9784	11.8344	11.1629	12.0944
ENSMUSG00000021111	Papola	TRUE	-0.35108	-9.65448	4.70548e-22	1.00618e-20	3696.47	3709.16	3829.42	4787.55	4667.03	4883.12
ENSMUSG00000028556	Dock7	TRUE	-0.15236	-2.67986	0.00736535	0.0206656	4446.36	3790.78	4415.07	4783.25	4554.47	4734.96
ENSMUSG00000031696	Vps35	TRUE	-0.249364	-6.78328	1.17476e-11	1.21953e-10	3975.22	4022.03	3956.17	4780.02	4623.3	4805.51
ENSMUSG00000022246	Rai14	TRUE	0.403683	8.96006	3.24496e-19	5.85458e-18	6123.81	6489.89	6694.72	4771.41	4834.47	4990.96
ENSMUSG00000030095	Tmem43	TRUE	0.277395	7.47318	7.82799e-14	9.75153e-13	5808.73	5612.48	5756.81	4766.03	4807.49	4601.92
ENSMUSG00000031229	Atrx	TRUE	-0.0439464	-0.738416	0.460262	0.601221	4641.69	4116.12	4712.26	4756.35	4507.95	4631.15
ENSMUSG00000040462	Os9	TRUE	0.0712048	1.80332	0.0713385	0.142516	5092.21	5161.31	5248.96	4746.67	4832.61	5177.42
ENSMUSG00000055538	Zcchc24	TRUE	0.298633	8.28883	1.14373e-16	1.7663e-15	5786.16	6160.01	6019.04	4743.44	4872.61	4984.91
ENSMUSG00000031555	Adam9	TRUE	0.0395612	1.08571	0.277606	0.414531	5131.47	4977.66	5161.55	4741.29	5082.84	5033.29
ENSMUSG00000039100	March6	TRUE	-0.471076	-10.0453	9.63485e-24	2.28481e-22	3437.34	3117.42	3490.27	4740.21	4602.84	4594.87
ENSMUSG00000048076	Arf1	TRUE	-0.0284275	-0.618105	0.536506	0.67041	4689.78	4699.93	4714.01	4735.91	5060.52	4584.79
ENSMUSG00000086233	Gm11816	FALSE	1.13173	5.05988	4.19528e-07	2.57042e-06	87.3568	85.0204	107.514	43.0342	41.8609	43.3383
ENSMUSG00000028381	Ugcg	TRUE	-0.490011	-8.6242	6.45451e-18	1.08135e-16	3040.8	3558.39	3646.74	4719.77	4862.38	4807.53
ENSMUSG00000055296	Tmem245	TRUE	-0.531942	-8.2407	1.71201e-16	2.59848e-15	3571.81	2902.03	3564.57	4717.62	4839.12	4969.79
ENSMUSG00000017119	Nbr1	TRUE	-0.088056	-2.36779	0.0178948	0.0443193	4561.2	4375.72	4562.79	4715.47	4773.07	4865.98
ENSMUSG00000039646	Vasn	TRUE	0.361211	5.18387	2.17332e-07	1.3912e-06	4963.63	6391.27	6394.03	4713.32	4434.47	4670.46
ENSMUSG00000066113	Adamtsl1	TRUE	0.0702824	1.23656	0.216249	0.342237	4997.98	4333.78	5103.86	4704.71	4452.14	4602.93
ENSMUSG00000016541	Atxn10	TRUE	-0.0334243	-0.94094	0.346736	0.490191	4592.61	4553.69	4703.52	4704.71	4751.68	4721.86
ENSMUSG00000043716	Rpl7	TRUE	-0.263774	-5.9465	2.73931e-09	2.2167e-08	4069.45	4114.99	4001.62	4702.56	4823.31	5100.82
ENSMUSG00000072653	Zfp783	FALSE	1.12584	9.19177	3.86432e-20	7.36133e-19	320.962	295.871	321.668	149.544	144.188	137.07
ENSMUSG00000035093	Secisbp2l	TRUE	-0.315827	-6.37011	1.88898e-10	1.73534e-09	3773.03	3637.74	4041.83	4702.56	4663.31	4899.24
ENSMUSG00000068039	Tcp1	TRUE	-0.0811396	-2.08085	0.0374478	0.0835755	4446.36	4553.69	4332.03	4702.56	4678.19	4716.82
ENSMUSG00000056076	Eif3b	TRUE	-0.18498	-3.99292	6.52657e-05	0.000286631	3955.59	4509.48	4327.66	4693.95	4890.28	4951.65
ENSMUSG00000013663	Pten	TRUE	0.180279	3.56515	0.000363645	0.00139751	5675.25	4822.36	5353.85	4688.57	4642.84	4665.42
ENSMUSG00000004677	Myo9b	TRUE	0.251309	6.27868	3.41464e-10	3.03836e-09	5450.47	5703.17	5777.79	4678.89	4641.91	4905.29
ENSMUSG00000030218	Mgp	TRUE	1.10795	8.79767	1.3968e-18	2.43524e-17	9274.54	12490.1	10293.4	4677.81	5314.47	4879.09
ENSMUSG00000072621	Slfn10-ps	FALSE	1.11745	4.14914	3.33728e-05	0.000154379	54.9661	75.9516	70.802	27.9722	35.3492	29.2282
ENSMUSG00000015305	Sash1	TRUE	-0.0339049	-0.77991	0.435444	0.577119	4508.2	4308.84	4760.34	4677.81	4490.28	4744.03
ENSMUSG00000000001	Gnai3	TRUE	-0.0750045	-1.84599	0.0648939	0.13167	4514.09	4341.71	4532.2	4673.51	4726.56	4706.74
ENSMUSG00000038545	Cul7	TRUE	0.0214096	0.510729	0.609541	0.731517	4748.67	4651.18	4943.03	4671.36	4639.12	4827.69
ENSMUSG00000031441	Atp11a	TRUE	-0.163016	-3.83048	0.000127892	0.000534163	4201.96	3960.82	4439.54	4665.98	4637.26	4819.62
ENSMUSG00000024548	Setbp1	TRUE	-0.449914	-7.65523	1.9296e-14	2.53858e-13	3616.96	3064.14	3640.62	4663.83	4612.14	4835.75
ENSMUSG00000006498	Ptbp1	TRUE	-0.0147113	-0.351528	0.725192	0.820212	4631.87	4868.84	4914.18	4663.83	4828.89	5068.57
ENSMUSG00000025220	Mgea5	TRUE	-0.0758223	-1.97206	0.0486027	0.103913	4565.13	4294.1	4443.04	4662.75	4660.51	4701.7
ENSMUSG00000025268	Maged2	TRUE	0.608691	16.1739	7.7061e-59	5.78381e-57	7289.87	7181.39	6942.09	4656.3	4744.24	4638.21
ENSMUSG00000034908	Sidt2	TRUE	0.0711773	1.9243	0.0543173	0.113797	4841.92	4966.33	4796.18	4654.14	4473.54	4772.25
ENSMUSG00000024921	Smarca2	TRUE	0.332445	7.66126	1.84111e-14	2.42641e-13	6112.03	5668.03	6104.7	4651.99	4757.26	4799.46
ENSMUSG00000058587	Tmod3	TRUE	0.0454245	1.1073	0.268162	0.404074	4718.25	4833.7	5039.18	4649.84	4694	4798.46
ENSMUSG00000003534	Ddr1	TRUE	-0.115187	-2.48213	0.0130599	0.033818	4437.53	3969.89	4152.84	4648.77	4398.19	4564.63
ENSMUSG00000048078	Tenm4	TRUE	-0.644932	-5.47491	4.37737e-08	3.07769e-07	3301.89	2632.23	3478.91	4645.54	4695.86	5383.02
ENSMUSG00000022186	Oxct1	TRUE	0.336312	8.20262	2.35201e-16	3.54479e-15	5685.06	5649.89	5845.09	4644.46	4435.4	4533.39
ENSMUSG00000010095	Slc3a2	TRUE	-1.36113	-28.9786	1.225e-184	5.57225e-182	1857.07	1967.94	1803.26	4641.23	4960.98	4835.75
ENSMUSG00000036438	Calm2	TRUE	0.216574	5.24759	1.54102e-07	1.00926e-06	5499.55	5654.43	5469.23	4640.16	4787.96	4873.04
ENSMUSG00000021959	Lats2	TRUE	-0.102569	-2.33643	0.0194688	0.0476905	4217.66	4224.95	4663.31	4638.01	4645.63	4797.45
ENSMUSG00000037266	D4Wsu53e	TRUE	-0.0991808	-0.799295	0.42412	0.566764	4051.78	4260.09	3256.02	4636.93	4040.97	3710.97
ENSMUSG00000026640	Plxna2	TRUE	-0.487864	-9.25013	2.24217e-20	4.34287e-19	3344.1	3149.16	3526.99	4633.7	4600.05	4828.69
ENSMUSG00000043940	Wdfy3	TRUE	-0.265905	-3.74262	0.000182115	0.000743062	3940.87	3442.76	4317.17	4632.63	4494.93	4951.65
ENSMUSG00000040725	Hnrnpul1	TRUE	-0.0491497	-1.24556	0.212927	0.338084	4664.26	4432.4	4763.84	4632.63	4882.84	4830.71
ENSMUSG00000072235	Tuba1a	TRUE	-0.169628	-3.38235	0.000718674	0.00259515	4287.35	4195.48	4383.6	4631.55	4827.03	5015.15
ENSMUSG00000031386	Hcfc1	TRUE	-0.267363	-5.12733	2.93878e-07	1.8436e-06	3953.63	3612.8	4201.79	4630.48	4634.47	4911.34
ENSMUSG00000039270	Megf9	TRUE	-0.0289944	-0.476414	0.63378	0.750763	4757.51	4049.24	4580.27	4629.4	4518.19	4518.27
ENSMUSG00000053819	Camk2d	TRUE	-0.14687	-3.52566	0.000422429	0.00160048	4137.18	4023.17	4133.61	4627.25	4494	4495.09
ENSMUSG00000043991	Pura	TRUE	-0.161588	-2.47968	0.0131499	0.0340098	4328.58	3557.26	4219.27	4621.87	4633.54	4292.51
ENSMUSG00000029407	Uso1	TRUE	-0.148982	-3.77553	0.00015967	0.000657019	4112.64	4103.65	4408.08	4618.64	4632.61	4755.12
ENSMUSG00000028759	Hp1bp3	TRUE	-0.0253445	-0.736106	0.461666	0.602248	4589.67	4571.83	4512.97	4602.5	4730.28	4579.75
ENSMUSG00000007564	Ppp2r1a	TRUE	-0.1144	-3.18377	0.00145371	0.00490483	4258.89	4306.57	4365.25	4600.35	4709.82	4687.59
ENSMUSG00000025234	Arih1	TRUE	-0.15876	-4.59234	4.38294e-06	2.31663e-05	4063.56	4110.45	4150.22	4596.05	4481.91	4683.56
ENSMUSG00000027365	Trpm7	TRUE	-0.184411	-3.72743	0.000193446	0.000784822	4102.82	3777.17	4140.6	4596.05	4485.63	4586.8
ENSMUSG00000001424	Snd1	TRUE	-0.205129	-5.22663	1.72631e-07	1.1218e-06	3859.4	4036.77	4145.85	4592.82	4581.44	4710.77
ENSMUSG00000097993	Ptprv	FALSE	1.08588	18.9735	2.82656e-80	3.0746e-78	3159.57	3196.77	2902.88	1396.46	1433.5	1528.93
ENSMUSG00000033953	Ppp3r1	TRUE	-0.213883	-5.01426	5.32383e-07	3.22372e-06	3755.36	4040.17	4077.67	4582.06	4734	4452.76
ENSMUSG00000052459	Atp6v1a	TRUE	-0.171531	-4.46879	7.86638e-06	4.00279e-05	4032.15	3844.06	4023.47	4579.91	4404.7	4426.55
ENSMUSG00000029455	Aldh2	TRUE	0.0464775	1.17011	0.241957	0.373741	4887.07	5009.4	4868.73	4577.76	4919.12	4792.41
ENSMUSG00000022390	Zc3h7b	TRUE	-0.0165735	-0.370751	0.710823	0.80902	4520.96	4645.52	4959.63	4568.08	4787.03	4937.54
ENSMUSG00000024335	Brd2	TRUE	-0.0677402	-1.59581	0.110531	0.201429	4174.48	4537.82	4347.76	4561.62	4625.17	4495.09
ENSMUSG00000055322	Tns1	TRUE	0.865823	16.3563	3.92143e-60	3.09814e-58	8703.29	7758.4	8980.49	4549.79	4685.63	4729.92
ENSMUSG00000029472	Anapc5	TRUE	0.0470009	1.22951	0.21888	0.345344	4713.34	4733.94	4433.43	4549.79	4432.61	4447.72
ENSMUSG00000002052	Supt6	TRUE	-0.190577	-4.77841	1.7669e-06	9.90029e-06	3995.84	3941.55	4108.26	4548.71	4429.81	4775.28
ENSMUSG00000097558	AC102249.1	FALSE	1.07451	3.33322	0.000858474	0.00305658	28.4646	43.077	38.4603	17.2137	16.7444	18.1416
ENSMUSG00000037119	D15Ertd621e	TRUE	-0.187232	-4.84388	1.2733e-06	7.28133e-06	3990.93	4096.85	4224.52	4539.03	4684.7	4796.44
ENSMUSG00000032011	Thy1	TRUE	1.03843	21.5598	4.28138e-103	6.12075e-101	9775.12	9829.5	9922.76	4534.72	5022.38	4814.58
ENSMUSG00000029998	Pcyox1	TRUE	-0.189063	-4.74525	2.08249e-06	1.15565e-05	4120.49	3880.33	3881	4505.68	4607.49	4431.59
ENSMUSG00000030861	Acadsb	TRUE	-0.263764	-6.52447	6.82406e-11	6.55381e-10	3922.22	3796.45	3883.62	4504.6	4680.05	4746.05
ENSMUSG00000029103	Lrpap1	TRUE	-0.0571118	-1.36498	0.172259	0.286386	4572	4277.09	4504.23	4503.53	4551.68	4842.8
ENSMUSG00000027805	Pfn2	TRUE	-0.0196729	-0.474673	0.63502	0.751817	4577.89	4473.21	4435.17	4500.3	4650.28	4518.27
ENSMUSG00000003435	Supt5	TRUE	-0.162855	-3.80741	0.00014043	0.000582642	3788.73	4171.67	4062.81	4493.84	4588.89	4372.13
ENSMUSG00000053279	Aldh1a1	TRUE	-0.164653	-2.97288	0.00295019	0.00919927	3886.89	3765.84	3752.5	4493.84	4140.51	4152.41
ENSMUSG00000045817	Zfp36l2	TRUE	0.214769	1.90235	0.0571257	0.118736	4248.09	5418.64	6246.31	4489.54	4654	4569.67
ENSMUSG00000033732	Sf3b3	TRUE	0.00536194	0.123228	0.901926	0.9417	4348.21	4595.64	4709.64	4489.54	4480.05	4635.18
ENSMUSG00000037062	Sh3glb1	TRUE	-0.0521773	-1.23246	0.217776	0.344017	4223.55	4285.03	4478.01	4488.46	4442.84	4538.43
ENSMUSG00000061731	Ext1	TRUE	-0.0933812	-2.02173	0.0432045	0.0942694	4125.4	4481.14	4560.17	4487.39	4671.68	4887.15
ENSMUSG00000030704	Rab6a	TRUE	-0.146022	-4.03226	5.52423e-05	0.000245642	3961.48	4186.41	4097.77	4486.31	4554.47	4504.16
ENSMUSG00000050295	Foxc1	TRUE	-0.285247	-5.62116	1.89684e-08	1.39167e-07	3417.71	3876.93	3929.07	4480.93	4700.51	4494.08
ENSMUSG00000022883	Robo1	TRUE	-0.398523	-6.18374	6.25994e-10	5.43796e-09	3611.07	3114.02	3770.86	4475.55	4499.58	4871.02
ENSMUSG00000063382	Bcl9l	TRUE	-0.01947	-0.442091	0.658424	0.769391	4688.8	4306.57	4700.9	4474.48	4762.84	4650.3
ENSMUSG00000045482	Trrap	TRUE	-0.160951	-1.46343	0.14335	0.247043	4142.08	3737.5	4695.66	4473.4	4456.79	5133.07
ENSMUSG00000037851	Iars	TRUE	-1.0905	-22.577	7.29072e-113	1.28754e-110	2045.52	2131.18	2230.7	4463.72	4617.72	4567.66
ENSMUSG00000032383	Ppib	TRUE	0.181638	3.78408	0.000154278	0.000636752	5342.5	5134.1	5071.52	4460.49	4789.82	4454.77
ENSMUSG00000024853	Sf3b2	TRUE	0.057313	1.44581	0.148231	0.253399	4723.15	4886.97	4792.68	4457.26	4600.05	4780.32
ENSMUSG00000025369	Smarcc2	TRUE	-0.00227435	-0.0649816	0.948189	0.970626	4494.46	4383.65	4397.59	4456.19	4374.93	4467.88
ENSMUSG00000028184	Lphn2	TRUE	0.402825	7.71355	1.22366e-14	1.64198e-13	6358.39	5681.63	6355.57	4455.11	4536.79	4927.46
ENSMUSG00000020198	Ap3d1	TRUE	-0.0676997	-1.49286	0.135475	0.236715	4108.71	4207.94	4279.58	4455.11	4186.09	4564.63
ENSMUSG00000027366	Sppl2a	TRUE	0.0625498	1.64567	0.0998311	0.185949	4545.5	4477.74	4600.38	4441.13	4411.21	4196.76
ENSMUSG00000038872	Zfhx3	TRUE	-0.0258376	-0.24231	0.80854	0.878389	4486.6	3803.25	5114.35	4435.75	4574.93	4640.22
ENSMUSG00000028053	Ash1l	TRUE	-0.224669	-3.21705	0.00129515	0.0044115	3932.04	3384.95	4215.78	4422.84	4394.47	4668.44
ENSMUSG00000034160	Ogt	TRUE	-0.13043	-1.76582	0.0774265	0.151948	4063.56	3785.11	3264.76	4421.76	3970.27	3770.43
ENSMUSG00000002957	Ap2a2	TRUE	-0.101231	-2.64077	0.00827172	0.0228374	4062.58	4186.41	4176.44	4416.38	4360.05	4552.54
ENSMUSG00000027868	Tbx15	TRUE	-0.312487	-7.77871	7.32652e-15	1.00163e-13	3455.01	3526.65	3506.01	4416.38	4357.26	4250.18
ENSMUSG00000022098	Bmp1	TRUE	0.622054	16.1277	1.63092e-58	1.21196e-56	6565.5	6771.03	6449.1	4413.15	4238.18	4202.81
ENSMUSG00000013033	Lphn1	TRUE	0.0395076	0.880205	0.378748	0.52241	4472.86	4362.12	4643.21	4413.15	4360.98	4345.92
ENSMUSG00000022234	Cct5	TRUE	-0.0585956	-1.40438	0.160206	0.270329	4257.91	4423.33	4230.64	4405.62	4480.05	4555.56
ENSMUSG00000016559	H3f3b	TRUE	-0.24416	-6.04715	1.47428e-09	1.22742e-08	3723.95	3821.39	3813.69	4402.39	4613.07	4434.62
ENSMUSG00000021978	Extl3	TRUE	-0.0088382	-0.249958	0.80262	0.875018	4176.44	4334.91	4415.07	4400.24	4279.12	4330.81
ENSMUSG00000019188	H13	TRUE	0.0383934	0.983625	0.3253	0.467071	4273.61	4525.35	4486.75	4393.79	4328.42	4213.89
ENSMUSG00000025935	Tram1	TRUE	-0.0699006	-1.85691	0.0633235	0.129063	4139.14	4026.57	4156.34	4393.79	4237.25	4309.64
ENSMUSG00000035569	Ankrd11	TRUE	-0.425627	-9.59899	8.07301e-22	1.71406e-20	3117.36	3304.46	3457.06	4390.56	4374	4509.2
ENSMUSG00000031299	Pdha1	TRUE	0.00374243	0.098116	0.92184	0.954152	4615.19	4511.75	4547.06	4389.48	4572.14	4675.5
ENSMUSG00000054452	Aes	TRUE	0.104321	2.41587	0.0156978	0.0396365	4699.6	4882.44	4887.96	4386.26	4620.51	4450.74
ENSMUSG00000042699	Dhx9	TRUE	-0.147471	-3.05356	0.00226145	0.0072925	4185.27	3940.41	4294.44	4386.26	4630.75	4745.04
ENSMUSG00000047187	Rab2a	TRUE	-0.0912208	-2.51198	0.0120056	0.0315009	4136.2	4266.89	4230.64	4365.82	4540.51	4547.5
ENSMUSG00000031865	Dctn1	TRUE	-0.11849	-2.6735	0.0075065	0.0210146	3982.09	4164.87	4284.83	4365.82	4411.21	4720.85
ENSMUSG00000036402	Gng12	TRUE	-0.246013	-6.02812	1.65881e-09	1.37571e-08	3563.96	3611.67	3900.23	4364.74	4446.56	4331.81
ENSMUSG00000029405	G3bp2	TRUE	-0.121171	-3.29216	0.000994212	0.00348531	4009.58	3864.46	4097.77	4363.66	4377.72	4287.47
ENSMUSG00000027955	Fam198b	TRUE	0.554908	11.9542	6.16921e-33	2.13378e-31	6332.87	6912.73	6959.57	4362.59	4568.42	4820.63
ENSMUSG00000097461	AL606528.1	FALSE	1.0328	3.19957	0.00137635	0.00466164	36.3169	51.0123	41.9567	19.3654	22.3258	21.1652
ENSMUSG00000001761	Smo	TRUE	-0.211041	-4.9352	8.00701e-07	4.72272e-06	3787.75	3689.89	3802.33	4362.59	4290.28	4408.41
ENSMUSG00000078812	Eif5a	TRUE	0.0893986	2.36897	0.0178375	0.0441993	4555.31	4779.28	4590.76	4356.13	4373.07	4353.99
ENSMUSG00000021279	Cdc42bpb	TRUE	-0.0509044	-1.35087	0.176736	0.292243	4178.4	4229.48	4336.4	4356.13	4317.25	4532.38
ENSMUSG00000025967	Eef1b2	TRUE	-0.0621406	-1.42823	0.153226	0.260349	4431.64	4416.53	4287.45	4356.13	4741.45	4608.98
ENSMUSG00000042207	Kdm5b	TRUE	-0.272725	-6.32013	2.61347e-10	2.35762e-09	3588.5	3503.98	3724.53	4346.45	4301.44	4427.56
ENSMUSG00000034667	Xpot	TRUE	-0.99103	-24.813	6.48559e-136	1.67854e-133	2210.42	2143.65	2221.96	4344.3	4309.81	4424.54
ENSMUSG00000025224	Gbf1	TRUE	-0.0519038	-1.00027	0.317178	0.458024	4210.79	3973.29	4461.4	4344.3	4227.02	4546.49
ENSMUSG00000027782	Kpna4	TRUE	-0.180107	-5.13175	2.87059e-07	1.80673e-06	3745.54	3913.21	3881	4341.07	4414	4315.69
ENSMUSG00000028868	Wasf2	TRUE	-0.0641953	-1.73975	0.0819038	0.159194	4059.64	4251.02	4347.76	4340	4434.47	4460.82
ENSMUSG00000024423	Impact	TRUE	-0.30666	-7.77994	7.25615e-15	9.93815e-14	3565.92	3475.64	3424.72	4336.77	4403.77	4201.8
ENSMUSG00000032431	Crtap	TRUE	0.366509	9.28732	1.5822e-20	3.08847e-19	5628.13	5556.94	5489.34	4329.24	4319.12	4284.44
ENSMUSG00000018906	P4ha2	TRUE	-0.896704	-23.0721	8.81866e-118	1.65471e-115	2324.28	2304.62	2296.26	4323.86	4294	4275.37
ENSMUSG00000004263	Atn1	TRUE	-0.0085859	-0.189484	0.849714	0.905449	4337.41	4561.63	4607.37	4321.71	4538.65	4724.88
ENSMUSG00000004535	Tax1bp1	TRUE	-0.263553	-7.20142	5.95895e-13	6.95025e-12	3621.87	3533.45	3590.8	4306.64	4203.77	4394.3
ENSMUSG00000046785	Epm2aip1	TRUE	-0.0405556	-0.726398	0.467595	0.60808	4465.01	3743.17	4016.48	4294.81	4227.02	4056.67
ENSMUSG00000034297	Med13	TRUE	-0.301591	-4.91346	8.94817e-07	5.24515e-06	3672.91	3168.43	3787.47	4293.73	4299.58	4517.26
ENSMUSG00000031563	Wwc2	TRUE	-0.385605	-9.30503	1.33959e-20	2.62514e-19	3144.84	3309	3436.95	4286.2	4286.56	4352.98
ENSMUSG00000054008	Ndst1	TRUE	0.0907005	1.93586	0.0528855	0.11131	4602.43	4439.2	4895.82	4286.2	4220.51	4589.83
ENSMUSG00000005442	Cic	TRUE	-0.0193478	-0.472789	0.636364	0.752873	4370.78	4120.66	4484.12	4286.2	4438.19	4433.61
ENSMUSG00000015733	Capza2	TRUE	-0.111797	-3.19123	0.00141668	0.00479176	3934.98	3858.79	3976.27	4285.13	4207.49	4232.04
ENSMUSG00000015656	Hspa8	TRUE	-0.173029	-3.37155	0.00074746	0.00268939	3600.28	4142.2	4032.22	4277.6	4543.3	4448.73
ENSMUSG00000027206	Cops2	TRUE	-0.178134	-4.14384	3.41545e-05	0.000157703	4060.62	3710.29	3909.84	4276.52	4448.42	4495.09
ENSMUSG00000068739	Sars	TRUE	-0.969957	-21.2711	2.10202e-100	2.81727e-98	2152.51	2340.9	2282.27	4275.44	4523.77	4464.85
ENSMUSG00000022893	Adamts1	TRUE	0.155931	1.3072	0.191143	0.310458	5812.66	3995.96	5229.73	4275.44	4430.74	4794.43
ENSMUSG00000027230	Creb3l1	TRUE	-0.156264	-3.56577	0.000362793	0.00139459	3786.77	3907.54	3985.01	4273.29	4295.86	4447.72
ENSMUSG00000022463	Srebf2	TRUE	-0.213597	-4.17	3.04605e-05	0.000141649	3333.3	3723.9	3770.86	4273.29	4166.56	4117.14
ENSMUSG00000008730	Hipk1	TRUE	-0.0716535	-1.41783	0.156241	0.264666	4029.21	3737.5	4269.1	4273.29	4198.18	4187.69
ENSMUSG00000032086	Bace1	TRUE	0.318476	8.69192	3.5636e-18	6.06499e-17	5473.05	5332.48	5350.36	4271.14	4238.18	4447.72
ENSMUSG00000052854	Nrk	TRUE	0.00887087	0.0771479	0.938506	0.965587	4306	3623	4550.56	4265.76	4067.95	4072.79
ENSMUSG00000049288	Lix1l	TRUE	0.0995303	2.54907	0.010801	0.0287267	4568.07	4372.32	4725.38	4263.61	4212.14	4288.48
ENSMUSG00000025862	Stag2	TRUE	-0.29189	-6.46571	1.00822e-10	9.50655e-10	3524.7	3301.06	3524.36	4262.53	4221.44	4194.74
ENSMUSG00000027351	Spred1	TRUE	-0.138141	-2.02171	0.0432066	0.0942694	3344.1	4147.86	4285.7	4258.23	4347.95	4355
ENSMUSG00000005034	Prkacb	TRUE	-0.0135622	-0.339092	0.73454	0.827109	4127.36	4036.77	4304.06	4253.93	4101.44	4240.1
ENSMUSG00000040021	Lats1	TRUE	-0.200181	-3.71752	0.000201184	0.000813133	3701.37	3451.83	3932.57	4252.85	4172.14	4320.73
ENSMUSG00000087366	BC042782	FALSE	0.989675	2.46785	0.0135928	0.0349767	19.6307	21.5385	26.2229	12.9102	11.1629	10.0787
ENSMUSG00000024758	Rtn3	TRUE	-0.29945	-7.6899	1.47245e-14	1.95948e-13	3461.88	3298.79	3345.17	4245.32	4054	4143.34
ENSMUSG00000007739	Cct4	TRUE	-0.18426	-4.91259	8.98821e-07	5.26422e-06	3672.91	3862.2	3707.05	4242.09	4272.6	4252.19
ENSMUSG00000036323	Srp72	TRUE	-0.139311	-3.59567	0.00032356	0.0012547	3930.07	3822.52	3867.01	4241.02	4184.23	4375.15
ENSMUSG00000003402	Prkcsh	TRUE	-0.194761	-4.76201	1.91671e-06	1.06879e-05	3708.25	3836.12	3925.58	4241.02	4416.79	4469.89
ENSMUSG00000036667	Fam115a	TRUE	0.0457433	1.09808	0.272168	0.408551	4501.33	4306.57	4526.95	4238.86	4293.07	4391.28
ENSMUSG00000048107	Kctd12	FALSE	0.982572	15.5327	2.08443e-54	1.39685e-52	14286.3	12528.6	13681.4	6983.37	6772.16	6741.63
ENSMUSG00000032228	Tcf12	TRUE	-0.134285	-2.62246	0.00872963	0.023928	4018.41	3847.46	4085.54	4234.56	4280.05	4606.96
ENSMUSG00000079477	Rab7	TRUE	-0.163325	-4.58396	4.56255e-06	2.40226e-05	3683.71	3833.85	3801.45	4234.56	4169.35	4271.34
ENSMUSG00000050989	Sepn1	TRUE	-0.00269083	-0.0611792	0.951216	0.972043	4496.42	4418.8	4373.11	4230.26	4474.47	4604.95
ENSMUSG00000033392	Clasp2	TRUE	-0.222137	-5.25584	1.4735e-07	9.67571e-07	3589.48	3381.55	3665.09	4224.88	4080.04	4113.11
ENSMUSG00000096188	Cmtm4	TRUE	-0.103041	-2.37558	0.0175216	0.0435243	3878.05	3674.02	4003.37	4217.35	4153.53	4049.61
ENSMUSG00000036698	Ago2	TRUE	-0.490284	-7.85682	3.9402e-15	5.51224e-14	3179.2	2759.2	3323.32	4214.12	4211.21	4596.88
ENSMUSG00000042506	Usp22	TRUE	-0.450374	-10.4921	9.39148e-26	2.49957e-24	3221.4	2982.52	3174.72	4208.74	4164.7	4450.74
ENSMUSG00000021819	Zswim8	TRUE	-0.0213545	-0.525258	0.599404	0.723168	3900.63	4022.03	4216.65	4206.59	4054.93	4065.74
ENSMUSG00000005087	Cd44	TRUE	0.778745	12.6496	1.12435e-36	4.44147e-35	6666.6	8183.5	7822.31	4195.83	4397.26	4619.06
ENSMUSG00000002808	Epdr1	TRUE	-0.0289678	-0.628947	0.529384	0.664041	3967.37	3827.05	3843.41	4195.83	3899.58	3782.53
ENSMUSG00000066306	Numa1	TRUE	-0.217601	-4.68913	2.74373e-06	1.49659e-05	3741.62	3564.06	3790.96	4194.75	4224.23	4490.05
ENSMUSG00000097758	AL591207.1	FALSE	0.974755	5.01214	5.38291e-07	3.25686e-06	182.566	149.636	114.507	82.8408	70.6984	73.5743
ENSMUSG00000014959	Gorasp2	TRUE	-0.00107674	-0.0288807	0.97696	0.986971	4106.75	4321.31	4302.31	4192.6	4228.88	4316.7
ENSMUSG00000045005	Fzd5	TRUE	-0.0947714	-1.93702	0.0527432	0.111073	3980.13	3562.92	3898.48	4191.53	4072.6	3962.93
ENSMUSG00000045767	B230219D22Rik	TRUE	-0.190314	-4.86722	1.13181e-06	6.52693e-06	3697.45	3567.46	3721.91	4188.3	4141.44	4212.89
ENSMUSG00000035133	Arhgap5	TRUE	-0.593597	-9.64758	5.0329e-22	1.07162e-20	2916.15	2373.77	2904.63	4187.22	4063.3	4130.24
ENSMUSG00000029752	Asns	TRUE	-2.41514	-41.4845	0	0	768.543	805.994	813.785	4186.15	4203.77	4349.96
ENSMUSG00000025162	Csnk1d	TRUE	0.00373799	0.0992587	0.920933	0.953717	4170.55	4316.77	4277.84	4182.92	4253.07	4293.52
ENSMUSG00000026842	Abl1	TRUE	-0.0331574	-0.841509	0.400063	0.543618	4176.44	4236.28	4275.21	4181.84	4274.46	4526.33
ENSMUSG00000097080	AC133646.1	FALSE	0.967706	2.94343	0.00324601	0.0100156	39.2615	44.2106	32.3416	20.4412	24.1863	14.1101
ENSMUSG00000014349	Ube2z	TRUE	0.00787345	0.195609	0.844917	0.902515	4098.9	4343.98	4242	4173.24	4245.63	4192.73
ENSMUSG00000029686	Cul1	TRUE	0.320168	8.10414	5.31177e-16	7.86342e-15	5208.03	5367.62	5341.61	4167.86	4286.56	4292.51
ENSMUSG00000002778	Kdelr1	TRUE	0.108347	2.83717	0.00455155	0.0135508	4674.08	4565.03	4524.33	4162.48	4388.88	4211.88
ENSMUSG00000020954	Strn3	TRUE	-0.242589	-6.51505	7.2664e-11	6.96526e-10	3479.55	3441.63	3566.32	4161.4	4085.62	4167.53
ENSMUSG00000029502	Golga3	TRUE	-0.122791	-2.50294	0.0123166	0.0321707	3860.38	3675.15	4104.77	4157.1	4282.84	4242.11
ENSMUSG00000024597	Slc12a2	TRUE	0.0347123	0.415603	0.677701	0.784044	4275.57	3443.89	4538.32	4157.1	3849.34	3967.97
ENSMUSG00000039497	Dse	TRUE	-0.0163841	-0.42253	0.672638	0.780171	3908.48	4003.9	4111.76	4154.95	3992.6	4019.38
ENSMUSG00000030655	Smg1	TRUE	-0.239426	-3.05331	0.00226329	0.00729687	3793.64	3136.69	4014.73	4152.8	4127.49	4649.29
ENSMUSG00000031701	Dnaja2	TRUE	-0.0516701	-1.30171	0.193016	0.312789	3803.45	4167.14	3932.57	4150.64	4126.56	4052.64
ENSMUSG00000034269	Setd5	TRUE	-0.0678835	-1.51215	0.130496	0.22978	3929.09	3917.74	4164.2	4147.42	4143.3	4304.6
ENSMUSG00000022324	Matn2	TRUE	0.304177	5.10193	3.36209e-07	2.09586e-06	5291.46	4729.4	5220.99	4143.11	4029.81	4176.6
ENSMUSG00000017765	Slc12a4	TRUE	-0.0935851	-2.14271	0.0321364	0.0734246	3584.57	3981.22	3905.47	4143.11	4059.58	4035.5
ENSMUSG00000022912	Pros1	TRUE	0.495371	10.0541	8.8111e-24	2.09942e-22	6226.87	5933.29	6114.32	4137.73	4405.63	4419.5
ENSMUSG00000069769	Msi2	TRUE	-0.24963	-5.15962	2.47455e-07	1.57329e-06	3628.74	3289.72	3634.5	4134.51	4318.19	4101.01
ENSMUSG00000024493	Lars	TRUE	-1.06765	-25.9266	3.34199e-148	1.09058e-145	1988.59	2006.48	1955.36	4130.2	4193.53	4142.34
ENSMUSG00000020402	Vdac1	TRUE	-0.102244	-2.99301	0.00276236	0.00869305	3903.57	3900.74	3848.65	4128.05	4191.67	4185.67
ENSMUSG00000031548	Sfrp1	TRUE	1.74912	17.0943	1.6374e-65	1.44583e-63	17123.9	14089.6	14815.1	4126.98	4607.49	4957.7
ENSMUSG00000050812	AI314180	TRUE	-0.24448	-4.82992	1.36586e-06	7.77213e-06	3361.76	3108.35	3480.66	4126.98	3831.67	3841.99
ENSMUSG00000043019	Edem3	TRUE	-0.0959592	-2.19353	0.0282693	0.0656686	3830.94	3695.56	3893.23	4125.9	3982.37	4104.04
ENSMUSG00000015165	Hnrnpl	TRUE	0.230372	6.0488	1.45928e-09	1.21561e-08	4975.41	4961.79	4721.88	4122.67	4228.88	4137.3
ENSMUSG00000034675	Dbn1	TRUE	0.108653	2.5175	0.0118192	0.0310932	4398.27	4748.67	4655.45	4122.67	4240.04	4434.62
ENSMUSG00000029823	Luc7l2	TRUE	-0.171274	-4.09894	4.15047e-05	0.000188968	3735.73	3609.4	3529.61	4112.99	4149.81	3980.07
ENSMUSG00000031703	Itfg1	TRUE	0.138266	3.17017	0.00152348	0.0051104	4742.79	4375.72	4589.89	4108.69	4086.55	4265.3
ENSMUSG00000021134	Srsf5	TRUE	0.0306849	0.423373	0.672023	0.780061	4113.62	4265.76	3539.22	4104.38	3947.95	3610.18
ENSMUSG00000022403	St13	TRUE	-0.129229	-3.62169	0.000292687	0.00114713	3798.55	3776.04	3836.42	4100.08	4102.37	4280.41
ENSMUSG00000020170	Frs2	TRUE	-0.39765	-7.81778	5.37645e-15	7.43833e-14	3195.88	2873.69	3249.9	4100.08	4061.44	4127.22
ENSMUSG00000032777	Gtf3c1	TRUE	-0.0578332	-1.23393	0.217228	0.343388	4088.1	3816.85	4169.45	4081.79	4096.79	4397.33
ENSMUSG00000002020	Ltbp2	TRUE	1.10204	24.7013	1.0361e-134	2.6361e-132	9546.43	9284.23	9391.31	4078.56	4404.7	4661.39
ENSMUSG00000034807	Colgalt1	TRUE	0.379494	10.4803	1.06381e-25	2.82134e-24	5304.22	5405.03	5410.67	4077.49	4049.35	4265.3
ENSMUSG00000051695	Pcbp1	TRUE	0.145263	3.09307	0.00198096	0.00646439	4511.14	4822.36	4866.98	4077.49	4308.88	4451.75
ENSMUSG00000058914	C1qtnf3	TRUE	-0.750068	-9.78592	1.29407e-22	2.84411e-21	2830.75	2422.52	2508.66	4073.18	4326.56	4656.35
ENSMUSG00000034312	Iqsec1	TRUE	0.0920927	2.11572	0.0343688	0.0777792	4581.81	4229.48	4485.87	4071.03	4171.21	4237.07
ENSMUSG00000056537	Rlim	TRUE	-0.108529	-2.32496	0.020074	0.0489411	3770.08	3506.24	3947.43	4068.88	4120.97	3920.6
ENSMUSG00000039047	Pigk	TRUE	-0.329987	-8.99487	2.36518e-19	4.28789e-18	3211.59	3303.33	3235.04	4066.73	4095.86	4088.92
ENSMUSG00000075592	Nynrin	TRUE	0.0338579	0.605757	0.544676	0.677225	4483.66	3753.37	4229.76	4065.65	4047.48	4071.78
ENSMUSG00000026775	Yme1l1	TRUE	-0.106509	-2.56445	0.0103341	0.0276451	3790.69	3632.07	3903.72	4059.2	4078.18	4064.73
ENSMUSG00000000078	Klf6	TRUE	0.118242	2.49282	0.0126733	0.032999	3946.76	4362.12	4475.38	4057.05	3848.41	3876.26
ENSMUSG00000038170	Pde4dip	TRUE	-0.0190554	-0.445609	0.655879	0.767195	3988.97	3935.88	4231.51	4054.89	4093.07	4176.6
ENSMUSG00000026970	Rbms1	TRUE	0.100415	2.41051	0.01593	0.0401487	4371.76	4642.12	4400.21	4045.21	4214	4245.14
ENSMUSG00000005566	Trim28	TRUE	-0.154873	-3.68583	0.000227959	0.00091202	3618.93	3693.29	3498.14	4039.83	3852.13	4140.32
ENSMUSG00000003617	Cp	TRUE	0.232224	4.7899	1.66868e-06	9.37796e-06	4649.54	4764.55	4741.98	4038.76	3941.44	4071.78
ENSMUSG00000030894	Tpp1	TRUE	-0.356601	-8.86799	7.44796e-19	1.31841e-17	3218.46	3137.82	3256.02	4038.76	3977.72	4297.55
ENSMUSG00000075254	Heg1	TRUE	0.191449	3.05747	0.00223212	0.00720722	4762.42	4255.56	4739.36	4037.68	3890.27	4125.2
ENSMUSG00000025332	Kdm5c	TRUE	-0.115012	-2.41652	0.0156696	0.0395721	3788.73	3509.64	3882.74	4037.68	4005.62	4074.81
ENSMUSG00000000826	Dnajc5	TRUE	-0.171963	-4.50398	6.66938e-06	3.43562e-05	3487.4	3625.27	3762.12	4036.6	4122.83	4094.97
ENSMUSG00000030605	Mfge8	TRUE	-0.1893	-3.71924	0.000199824	0.000808506	3419.67	3655.88	3586.43	4034.45	3949.81	4171.56
ENSMUSG00000020790	Ankfy1	TRUE	-0.137521	-3.22289	0.00126906	0.00433147	3772.05	3557.26	3835.54	4026.92	4102.37	4159.47
ENSMUSG00000033487	Fndc3a	TRUE	-0.136508	-3.02427	0.00249234	0.0079331	3770.08	3434.83	3616.14	4024.77	3934	3942.78
ENSMUSG00000021745	Ptprg	TRUE	-0.356214	-7.66064	1.85006e-14	2.43607e-13	3255.76	3052.8	3348.67	4021.54	4021.44	4328.79
ENSMUSG00000026878	Rab14	TRUE	-0.118372	-3.33189	0.000862573	0.00306899	3745.54	3731.83	3731.53	4015.09	4076.32	4074.81
ENSMUSG00000027820	Mme	TRUE	-0.143526	-2.40774	0.0160515	0.0404007	3742.6	3514.18	3739.39	4007.56	4104.23	4037.52
ENSMUSG00000031532	Tmem66	TRUE	-0.478007	-11.7485	7.18881e-32	2.38742e-30	2831.73	3053.93	2985.92	4006.48	4207.49	4135.28
ENSMUSG00000031849	Comp	TRUE	1.12715	21.0626	1.75468e-98	2.27064e-96	8699.36	8086.01	8643.08	4005.4	3813.06	3826.87
ENSMUSG00000003458	Ncstn	TRUE	-0.162765	-3.6303	0.000283097	0.00111129	3615	3415.55	3728.9	4005.4	3866.09	4183.66
ENSMUSG00000038633	Degs1	TRUE	-0.231429	-6.10684	1.01626e-09	8.61869e-09	3415.75	3583.33	3514.75	4004.33	4139.58	4193.74
ENSMUSG00000028476	Reck	TRUE	-0.273849	-6.00989	1.85646e-09	1.52949e-08	3440.29	3254.58	3445.7	4004.33	4015.86	4246.15
ENSMUSG00000018501	Ncor1	TRUE	-0.0767285	-1.43296	0.151869	0.258481	3931.05	3647.94	4094.28	4004.33	3949.81	4365.07
ENSMUSG00000038612	Mcl1	TRUE	0.201004	4.05574	4.99754e-05	0.000224336	4197.05	4806.49	4779.57	3997.87	3997.25	3994.18
ENSMUSG00000025228	Actr1a	TRUE	-0.0350477	-0.93106	0.351823	0.495051	4003.69	3974.42	4023.47	3997.87	4045.62	4254.21
ENSMUSG00000091337	Eid1	TRUE	0.249289	5.37907	7.48733e-08	5.10179e-07	4922.41	4769.08	4694.78	3995.72	4202.84	3901.46
ENSMUSG00000031065	Cdk16	TRUE	-0.0221408	-0.597645	0.550077	0.681906	3890.81	3997.09	3887.99	3992.49	3991.67	3969.99
ENSMUSG00000020483	Dynll2	TRUE	-0.237725	-4.08548	4.39859e-05	0.000199478	3684.69	3319.2	3311.96	3981.74	4389.81	3789.58
ENSMUSG00000025232	Hexa	TRUE	0.229167	5.76989	7.93214e-09	6.04413e-08	4455.2	4628.51	4679.92	3976.36	3855.85	3912.54
ENSMUSG00000060147	Serpinb6a	TRUE	0.227441	5.24958	1.5245e-07	9.99752e-07	4822.29	4846.16	4557.55	3976.36	4143.3	4024.41
ENSMUSG00000089726	Mir17hg	FALSE	0.893705	2.40072	0.0163629	0.0410604	17.6677	31.741	25.3488	15.062	16.7444	8.06294
ENSMUSG00000032199	Polr2m	TRUE	-0.342977	-8.73419	2.45417e-18	4.21504e-17	3273.42	3141.22	3172.1	3975.28	4027.95	4157.45
ENSMUSG00000038181	Chpf2	TRUE	0.238618	4.9938	5.92026e-07	3.55903e-06	4521.94	4714.67	4636.22	3974.2	4064.23	3717.02
ENSMUSG00000020097	Sgpl1	TRUE	-0.121379	-2.96281	0.00304845	0.00946438	3439.3	3671.75	3636.25	3972.05	3726.55	3994.18
ENSMUSG00000027620	Rbm39	TRUE	-0.113763	-2.3802	0.0173031	0.0430883	3654.26	3828.19	3374.02	3967.75	3943.3	3825.87
ENSMUSG00000036309	Skp1a	TRUE	-0.155408	-3.97727	6.97114e-05	0.000304286	3637.57	3751.1	3540.97	3966.67	4193.53	4001.23
ENSMUSG00000058325	Dock1	TRUE	-0.30319	-5.82616	5.67159e-09	4.40892e-08	3381.39	3136.69	3422.09	3963.45	4126.56	4180.63
ENSMUSG00000022146	Osmr	TRUE	-0.0643097	-1.1481	0.250929	0.384161	3596.35	4364.38	3992.88	3961.29	4225.16	4303.59
ENSMUSG00000030530	Furin	TRUE	0.276467	6.34049	2.2904e-10	2.08119e-09	4448.32	4871.1	4911.56	3955.92	3797.25	3998.21
ENSMUSG00000072825	Cep170b	TRUE	-0.18304	-4.46651	7.95074e-06	4.04297e-05	3329.37	3516.45	3520.87	3955.92	3787.95	4027.44
ENSMUSG00000006998	Psmd2	TRUE	-0.0607931	-1.47126	0.141222	0.244271	3697.45	3887.13	3922.95	3954.84	3922.83	4126.21
ENSMUSG00000040385	Ppp1ca	TRUE	0.0610623	1.46318	0.143419	0.247086	3963.45	4143.33	4076.79	3952.69	3940.51	3783.53
ENSMUSG00000038324	Trpc4ap	TRUE	-0.161848	-4.41555	1.00754e-05	5.04307e-05	3416.73	3443.89	3538.35	3949.46	3827.02	3863.16
ENSMUSG00000041417	Pik3r1	TRUE	0.247177	4.26168	2.02896e-05	9.71504e-05	4901.79	4363.25	4797.05	3948.38	3824.23	4080.86
ENSMUSG00000029313	Aff1	TRUE	-0.178031	-4.066	4.78265e-05	0.000215657	3413.78	3400.82	3747.26	3946.23	3976.79	4035.5
ENSMUSG00000026457	Adipor1	TRUE	-0.179147	-4.6492	3.33218e-06	1.79667e-05	3318.58	3539.12	3536.6	3946.23	3867.02	3955.88
ENSMUSG00000022263	Trio	TRUE	-0.0584158	-1.14984	0.250209	0.383215	3732.78	3746.57	4149.34	3944.08	3942.37	4230.02
ENSMUSG00000090386	2810055G20Rik	FALSE	0.873961	3.99883	6.36573e-05	0.000280058	156.064	157.571	86.5357	87.1442	65.117	65.5114
ENSMUSG00000040043	Rbms2	TRUE	-0.210442	-4.65196	3.28792e-06	1.77456e-05	3438.32	3140.09	3399.37	3935.47	3852.13	3766.4
ENSMUSG00000078302	Foxd1	TRUE	-0.74985	-12.4681	1.11429e-35	4.27792e-34	2398.88	2244.54	2276.15	3933.32	4189.81	3512.42
ENSMUSG00000031691	Tnpo2	TRUE	-0.205928	-5.25487	1.48128e-07	9.72258e-07	3485.44	3493.77	3419.47	3932.25	4133.07	3922.62
ENSMUSG00000042323	Pbrm1	TRUE	-0.088088	-1.88926	0.058857	0.121611	3791.68	3344.14	3713.17	3925.79	3793.53	3823.85
ENSMUSG00000027624	Epb4.1l1	TRUE	-0.0636992	-1.63199	0.102682	0.19015	3633.65	3711.43	3857.4	3924.72	3833.53	3955.88
ENSMUSG00000009291	Pttg1ip	TRUE	-0.149538	-3.60421	0.000313099	0.00121886	3579.66	3657.01	3461.43	3919.34	3836.32	4106.05
ENSMUSG00000058355	Abce1	TRUE	-0.246342	-6.30876	2.81287e-10	2.53142e-09	3381.39	3375.88	3451.81	3919.34	4067.02	4124.19
ENSMUSG00000003660	Snrnp200	TRUE	-0.272467	-5.188	2.12567e-07	1.36186e-06	3397.1	3064.14	3428.21	3918.26	3895.86	4140.32
ENSMUSG00000024087	Cyp1b1	TRUE	0.0673233	1.41889	0.155932	0.264246	4560.22	4059.44	4230.64	3915.03	4246.56	4103.03
ENSMUSG00000033436	Armcx2	TRUE	-0.241413	-6.14673	7.90981e-10	6.76934e-09	3378.45	3216.04	3330.31	3909.65	3993.53	3832.92
ENSMUSG00000025410	Dctn2	TRUE	-0.0990926	-2.4789	0.0131789	0.0340673	3680.76	3794.18	3712.3	3908.58	4075.39	3993.17
ENSMUSG00000034636	Zyg11b	TRUE	-0.455241	-7.90454	2.68934e-15	3.78347e-14	2929.89	2565.35	2929.98	3907.5	3891.2	3762.37
ENSMUSG00000040945	Rcc2	TRUE	-0.531937	-10.638	1.984e-26	5.43465e-25	2824.86	2879.36	2706.21	3907.5	4142.37	4102.02
ENSMUSG00000055932	Fto	TRUE	0.282751	6.37019	1.88791e-10	1.73534e-09	5047.06	4614.91	4866.98	3906.43	3935.86	4105.04
ENSMUSG00000021759	Ppap2a	TRUE	0.150263	3.36277	0.000771659	0.00276915	4504.27	4078.71	4398.46	3906.43	3977.72	3818.81
ENSMUSG00000024639	Gnaq	TRUE	-0.249455	-5.93289	2.97656e-09	2.38809e-08	3080.06	3307.86	3361.78	3903.2	3888.41	3799.66
ENSMUSG00000027012	Dync1i2	TRUE	-0.0813788	-2.21891	0.0264931	0.062129	3759.29	3738.63	3608.28	3903.2	3857.72	3986.12
ENSMUSG00000032393	Dpp8	TRUE	-0.0799037	-2.02445	0.0429236	0.0937474	3707.26	3550.45	3872.26	3898.9	3933.06	3941.77
ENSMUSG00000096922	AC115050.1	FALSE	0.86291	2.80398	0.00504759	0.014819	48.0953	45.3442	35.838	18.2895	26.0468	26.2046
ENSMUSG00000031353	Rbbp7	TRUE	0.0799682	1.95458	0.0506331	0.107469	4253.98	4238.55	4120.5	3897.82	3978.65	4052.64
ENSMUSG00000031885	Cbfb	TRUE	0.142315	3.61046	0.000305656	0.00119267	4200.98	4347.38	4521.71	3893.52	4032.6	3917.58
ENSMUSG00000057236	Rbbp4	TRUE	-0.13284	-3.45395	0.000552444	0.00204154	3542.37	3516.45	3513.87	3892.44	3938.65	3760.35
ENSMUSG00000021782	Dlg5	TRUE	0.0736642	1.6121	0.10694	0.196437	4167.6	4078.71	4405.46	3892.44	3924.69	4210.87
ENSMUSG00000033623	Pcgf3	TRUE	-0.246794	-5.53797	3.06003e-08	2.20096e-07	3282.26	3231.91	3463.18	3887.06	4022.37	3934.71
ENSMUSG00000005683	Cs	TRUE	-0.029965	-0.853184	0.393557	0.536605	3743.58	3791.91	3853.03	3887.06	3838.18	3905.49
ENSMUSG00000046794	Ppp1r3b	TRUE	0.166726	1.97375	0.0484106	0.103532	4808.55	3460.9	4370.49	3885.98	3557.25	3823.85
ENSMUSG00000022708	Zbtb20	TRUE	0.386648	3.06272	0.00219338	0.00709281	5627.15	4429	6093.34	3881.68	4150.74	4322.74
ENSMUSG00000004085	B230120H23Rik	TRUE	0.00254638	0.0635239	0.949349	0.970887	3794.62	4012.96	3915.09	3878.45	3887.48	3932.7
ENSMUSG00000024594	Prrc1	TRUE	-0.164877	-3.60648	0.000310382	0.00120985	3520.77	3486.97	3739.39	3876.3	3964.69	4212.89
ENSMUSG00000048612	Myof	TRUE	0.157491	2.81063	0.00494452	0.0145705	4473.84	4128.59	4679.92	3875.23	3858.65	4181.64
ENSMUSG00000027198	Ext2	TRUE	-0.175828	-4.61248	3.97886e-06	2.11721e-05	3450.1	3599.2	3545.34	3873.07	4013.07	4076.82
ENSMUSG00000002748	Baz1b	TRUE	-0.0297825	-0.692434	0.488665	0.627435	3836.83	3730.7	3883.62	3866.62	3903.3	3923.63
ENSMUSG00000033326	Kdm4a	TRUE	-0.374333	-8.42485	3.61202e-17	5.78656e-16	3137.97	2886.16	2985.92	3865.54	3920.04	3897.42
ENSMUSG00000030557	Mef2a	TRUE	0.491978	10.1138	4.80073e-24	1.16045e-22	4884.13	5461.71	5554.02	3860.16	3648.41	3799.66
ENSMUSG00000044308	Ubr3	TRUE	-0.310348	-6.55366	5.61434e-11	5.44424e-10	3040.8	2932.64	3244.65	3852.63	3762.83	3825.87
ENSMUSG00000037410	Tbc1d2b	TRUE	0.262973	6.51035	7.49742e-11	7.17296e-10	4727.08	4393.86	4725.38	3851.56	3891.2	3802.68
ENSMUSG00000064368	mt-Nd6	TRUE	0.186492	0.691058	0.489529	0.628262	3934	3899.6	4375.74	3851.56	4801.91	2075.2
ENSMUSG00000028820	Sfpq	TRUE	0.259669	6.41823	1.37866e-10	1.28302e-09	4617.15	4610.37	4457.9	3850.48	3892.13	3684.76
ENSMUSG00000041075	Fzd7	TRUE	-0.388541	-9.18859	3.98041e-20	7.57287e-19	3048.65	2818.14	2958.82	3845.1	3903.3	3810.75
ENSMUSG00000024949	Sf1	TRUE	-0.103432	-2.28487	0.0223204	0.0536941	3666.04	3951.75	3644.12	3845.1	4057.72	4185.67
ENSMUSG00000011958	Bnip2	TRUE	-0.149337	-3.85583	0.000115336	0.000485505	3379.43	3585.6	3601.28	3827.89	3965.62	3922.62
ENSMUSG00000018750	Zbtb4	TRUE	-0.0183767	-0.455598	0.648679	0.760966	3895.72	3634.34	3887.11	3825.74	3887.48	3857.11
ENSMUSG00000005871	Apc	TRUE	-0.2778	-4.27643	1.89918e-05	9.12857e-05	3197.85	2746.73	3478.91	3821.43	3741.43	3874.24
ENSMUSG00000020520	Galnt10	TRUE	0.448482	11.4461	2.46093e-30	7.89337e-29	5246.31	5077.42	5334.62	3818.21	3876.32	3783.53
ENSMUSG00000048756	Foxo3	TRUE	-0.143725	-2.71126	0.00670275	0.0190523	3670.95	3254.58	3519.12	3813.9	3755.39	3976.04
ENSMUSG00000006728	Cdk4	TRUE	0.136796	3.41058	0.000648251	0.0023613	4348.21	4296.37	4238.5	3809.6	4026.09	3877.27
ENSMUSG00000004897	Hdgf	TRUE	-0.0825463	-1.80778	0.0706412	0.141273	3508.01	3869	3582.93	3809.6	3884.69	3902.46
ENSMUSG00000075700	2810407C02Rik	TRUE	-0.280002	-7.23351	4.70685e-13	5.55897e-12	3039.82	3039.2	3252.52	3808.52	3720.97	3811.75
ENSMUSG00000018846	Pank3	TRUE	-0.172565	-3.77427	0.000160479	0.000659627	3266.55	3218.31	3366.15	3807.45	3581.43	3721.05
ENSMUSG00000032637	Atxn2l	TRUE	-0.307345	-7.61005	2.73984e-14	3.55469e-13	2964.24	3074.34	3040.11	3806.37	3667.02	3761.36
ENSMUSG00000038406	Scaf1	TRUE	-0.0171177	-0.430454	0.666865	0.7761	3634.63	3927.94	3721.91	3799.92	3774.92	3837.96
ENSMUSG00000032547	Ryk	TRUE	-0.220785	-4.87815	1.07085e-06	6.19921e-06	3313.67	3363.41	3532.23	3797.76	3928.41	4174.59
ENSMUSG00000022505	Emp2	TRUE	0.0897947	2.2981	0.0215563	0.0521738	4003.69	3947.22	3892.36	3796.69	3648.41	3684.76
ENSMUSG00000001891	Ugp2	TRUE	-0.170961	-4.26945	1.95955e-05	9.39469e-05	3459.92	3251.18	3275.25	3791.31	3782.37	3670.65
ENSMUSG00000054604	Cggbp1	TRUE	-0.203752	-4.95533	7.2207e-07	4.29267e-06	3261.65	3170.7	3424.72	3791.31	3761.9	3808.73
ENSMUSG00000037712	Fermt2	TRUE	0.142969	3.24871	0.00115931	0.00399174	3924.18	4299.77	4200.04	3788.08	3680.04	3782.53
ENSMUSG00000061887	Ssbp3	TRUE	-0.212248	-5.13876	2.76559e-07	1.74357e-06	3414.77	3175.23	3226.3	3787.01	3801.9	3785.55
ENSMUSG00000023845	Lnpep	TRUE	-0.447542	-6.15812	7.36136e-10	6.33609e-09	3011.35	2338.63	2860.05	3783.78	3587.94	3834.94
ENSMUSG00000003363	Pld3	TRUE	0.257616	6.31599	2.68435e-10	2.42011e-09	4519.98	4621.71	4773.45	3782.7	3954.46	3902.46
ENSMUSG00000046413	D230002A01Rik	FALSE	0.826241	3.63667	0.000276183	0.00108642	97.1721	99.7573	76.9206	47.3376	53.9541	52.4091
ENSMUSG00000029598	Plbd2	TRUE	-0.109852	-2.60594	0.00916225	0.0249715	3311.7	3620.74	3596.91	3778.4	3807.48	3774.46
ENSMUSG00000020099	Unc5b	TRUE	-0.236796	-3.90815	9.30042e-05	0.000397293	2883.75	3595.8	3378.39	3778.4	3900.51	3931.69
ENSMUSG00000016262	Sertad4	TRUE	-0.262121	-5.48683	4.09216e-08	2.89343e-07	3288.15	2999.52	3246.4	3777.32	3834.46	3828.89
ENSMUSG00000021171	Esyt2	TRUE	0.195339	4.32617	1.51722e-05	7.39943e-05	4488.57	4251.02	4723.63	3773.02	3948.88	4042.56
ENSMUSG00000041879	Ipo9	TRUE	0.085916	2.09307	0.036343	0.0814368	3950.69	3829.32	3912.46	3771.94	3598.18	3651.5
ENSMUSG00000063457	Rps15	TRUE	-0.00771489	-0.134015	0.893391	0.936146	3757.32	4088.92	4103.89	3771.94	4278.18	3959.91
ENSMUSG00000053510	Nrd1	TRUE	-0.200821	-5.56031	2.69298e-08	1.95287e-07	3350.97	3297.66	3243.78	3767.64	3805.62	3793.61
ENSMUSG00000062203	Gspt1	TRUE	-0.0719708	-1.71029	0.0872127	0.167453	3507.03	3611.67	3820.68	3764.41	3832.6	3906.49
ENSMUSG00000040481	Bptf	TRUE	-0.129831	-2.14512	0.0319437	0.0730246	3449.12	3226.24	3716.67	3761.19	3708.88	3908.51
ENSMUSG00000031523	Dlc1	TRUE	-0.00174596	-0.0282783	0.97744	0.987142	3407.9	3776.04	4220.15	3760.11	3799.11	3863.16
ENSMUSG00000090084	Srpx	TRUE	0.347364	6.79103	1.11334e-11	1.15817e-10	4993.08	4413.13	4726.25	3754.73	3696.78	3661.58
ENSMUSG00000024695	Zfp91	TRUE	-0.0693791	-1.87152	0.0612728	0.125685	3505.07	3467.7	3593.42	3753.65	3620.5	3720.04
ENSMUSG00000022241	Tars	TRUE	-0.708146	-15.5159	2.70651e-54	1.80566e-52	2196.68	2371.5	2389.78	3749.35	3748.88	3869.2
ENSMUSG00000012017	Scarf2	TRUE	0.591833	13.6318	2.59058e-42	1.21522e-40	5414.16	5577.34	5620.45	3746.12	3740.5	3535.6
ENSMUSG00000018339	Gpx3	TRUE	1.96927	39.4563	0	0	14653.4	13664.5	13699.7	3743.97	3507.01	3482.18
ENSMUSG00000034377	Tulp4	TRUE	-0.0252182	-0.525017	0.599571	0.723253	3827.99	3496.04	3990.26	3740.74	3787.02	3996.19
ENSMUSG00000031176	Dynlt3	TRUE	-0.337743	-7.85303	4.06106e-15	5.67075e-14	3108.53	2809.08	2999.91	3739.67	3809.34	3728.1
ENSMUSG00000028082	Sh3d19	TRUE	0.557607	12.5462	4.17144e-36	1.61566e-34	5589.85	5200.98	5634.44	3737.52	3708.88	3719.03
ENSMUSG00000021589	Rhobtb3	TRUE	-0.171109	-3.49479	0.000474428	0.00177952	3486.42	3077.74	3328.57	3736.44	3728.41	3680.73
ENSMUSG00000034484	Snx2	TRUE	-0.125313	-2.69794	0.00697691	0.0197121	3487.4	3199.04	3329.44	3733.21	3582.36	3615.22
ENSMUSG00000028452	Vcp	TRUE	-0.0791826	-2.04038	0.0413125	0.0908499	3503.1	3579.93	3519.99	3731.06	3659.57	3809.74
ENSMUSG00000022822	Abcc5	TRUE	-0.130777	-1.76139	0.0781726	0.153112	3316.61	3222.84	2754.28	3727.83	3340.5	3104.23
ENSMUSG00000028641	Lepre1	TRUE	0.240092	6.18123	6.36039e-10	5.51246e-09	4385.51	4606.97	4489.37	3722.46	3771.2	3917.58
ENSMUSG00000030122	Ptms	TRUE	0.390278	7.70178	1.34188e-14	1.79367e-13	4801.68	5059.28	4829.39	3720.3	3914.46	3568.86
ENSMUSG00000094410	Zbed6	TRUE	-0.00684116	-0.104199	0.917012	0.951547	3939.89	3160.49	3982.39	3720.3	3654.92	3770.43
ENSMUSG00000036580	Spg20	TRUE	-0.316204	-6.96164	3.36345e-12	3.67458e-11	3136.99	2790.94	2996.41	3719.23	3670.74	3730.12
ENSMUSG00000097415	RP23-285C18.2	FALSE	0.802727	2.58343	0.00978236	0.0264154	37.2984	35.1418	38.4603	13.9861	26.977	22.1731
ENSMUSG00000074884	Serf2	TRUE	-0.304973	-7.49918	6.42175e-14	8.03977e-13	2980.93	2974.58	2928.23	3713.85	3685.62	3573.9
ENSMUSG00000003731	Kpna6	TRUE	-0.10718	-2.75943	0.00579032	0.0167344	3438.32	3279.52	3417.72	3711.7	3587.01	3626.31
ENSMUSG00000007815	Rhoa	TRUE	0.110962	2.7535	0.00589615	0.0169912	4135.21	4192.07	4164.2	3703.09	3817.71	4043.56
ENSMUSG00000037652	Phc3	TRUE	-0.252996	-3.69447	0.000220345	0.00088344	3249.87	2686.65	3431.71	3700.94	3711.67	3762.37
ENSMUSG00000040711	Sh3pxd2b	TRUE	0.860115	16.62	4.99603e-62	4.12062e-60	6364.28	7319.69	7119.53	3698.79	3777.71	3982.08
ENSMUSG00000068040	Tm9sf4	TRUE	-0.213996	-5.49825	3.83585e-08	2.72117e-07	3306.8	3128.75	3181.72	3697.71	3648.41	3812.76
ENSMUSG00000052516	Robo2	TRUE	-0.126621	-1.92779	0.0538815	0.113058	3487.4	3148.02	3551.46	3696.63	3547.01	3884.32
ENSMUSG00000014498	Ankrd52	TRUE	-0.0908644	-2.02811	0.042549	0.0930376	3403.97	3456.36	3665.97	3691.26	3580.5	3945.8
ENSMUSG00000034602	Mon2	TRUE	-0.149419	-3.55466	0.00037847	0.00144671	3349	3185.43	3450.07	3690.18	3604.69	3789.58
ENSMUSG00000042626	Shc1	TRUE	0.444923	9.75116	1.82369e-22	3.9617e-21	4800.7	5400.5	4948.27	3689.1	3816.78	3615.22
ENSMUSG00000021969	Zdhhc20	TRUE	-0.28114	-6.17046	6.80928e-10	5.88452e-09	2809.16	2948.51	3060.22	3689.1	3577.71	3452.95
ENSMUSG00000034593	Myo5a	TRUE	-0.347456	-7.75632	8.74275e-15	1.1909e-13	2739.47	2889.56	2984.17	3689.1	3509.8	3765.39
ENSMUSG00000027864	Ptgfrn	TRUE	0.32871	7.29326	3.02541e-13	3.63025e-12	4712.36	4478.88	4863.48	3684.8	3659.57	3853.08
ENSMUSG00000020260	Pofut2	TRUE	0.241224	6.22868	4.70389e-10	4.14379e-09	4300.11	4435.8	4564.54	3684.8	3787.02	3781.52
ENSMUSG00000031529	Tnks	TRUE	-0.326883	-5.01611	5.27276e-07	3.19537e-06	3129.14	2593.69	3147.63	3684.8	3623.29	3828.89
ENSMUSG00000087159	Gm15246	FALSE	0.783481	2.38451	0.0171019	0.0426793	40.243	30.6074	45.4531	21.5171	24.1863	22.1731
ENSMUSG00000006676	Usp19	TRUE	-0.0622068	-1.47145	0.14117	0.24422	3454.03	3440.49	3544.47	3681.57	3670.74	3549.71
ENSMUSG00000032220	Myo1e	TRUE	0.190479	3.91623	8.99439e-05	0.000385096	3923.2	4459.61	4346.02	3680.5	3626.08	3846.02
ENSMUSG00000036904	Fzd8	TRUE	-0.400477	-9.3502	8.74837e-21	1.73706e-19	2809.16	2573.29	2797.11	3680.5	3593.53	3534.59
ENSMUSG00000020946	Gosr2	TRUE	-0.130956	-3.21677	0.00129643	0.00441486	3382.38	3370.21	3502.51	3677.27	3719.11	3836.95
ENSMUSG00000047213	Ythdf3	TRUE	-0.0746359	-1.50069	0.133437	0.233997	3353.91	3355.47	3716.67	3672.97	3670.74	3643.44
ENSMUSG00000004460	Dnajb11	TRUE	-0.345594	-8.37195	5.6671e-17	8.92643e-16	2974.06	2921.3	3083.82	3665.43	3856.78	3891.38
ENSMUSG00000060935	AI597468	TRUE	0.0413491	1.08753	0.276801	0.413685	3760.27	3658.15	3903.72	3664.36	3716.32	3628.32
ENSMUSG00000048376	F2r	TRUE	0.227994	4.38501	1.15981e-05	5.75343e-05	4324.65	4585.44	4897.57	3662.21	4026.09	4101.01
ENSMUSG00000030007	Cct7	TRUE	-0.137835	-3.33855	0.00084216	0.00300206	3390.23	3615.07	3506.88	3662.21	3952.6	3942.78
ENSMUSG00000023977	Ubr2	TRUE	-0.563389	-10.4569	1.36267e-25	3.6076e-24	2558.87	2251.34	2553.24	3662.21	3520.97	3710.97
ENSMUSG00000028517	Ppap2b	TRUE	0.540975	12.5538	3.78912e-36	1.47353e-34	5300.3	5730.38	5593.35	3660.06	3831.67	3929.68
ENSMUSG00000036644	Tbc1d9b	TRUE	0.115782	2.91669	0.00353764	0.0108088	4030.19	3884.87	4123.12	3658.98	3720.04	3736.16
ENSMUSG00000015291	Gdi1	TRUE	-0.124973	-3.08721	0.00202044	0.0065832	3367.65	3430.29	3220.18	3657.9	3587.01	3673.68
ENSMUSG00000020592	Sdc1	TRUE	0.236824	6.18436	6.23541e-10	5.41979e-09	4491.51	4331.51	4339.02	3653.6	3836.32	3676.7
ENSMUSG00000024143	Rhoq	TRUE	-0.129831	-3.51297	0.000443128	0.00167341	3336.24	3347.54	3380.14	3652.52	3597.25	3764.39
ENSMUSG00000008136	Fhl2	TRUE	-0.417056	-6.32186	2.58435e-10	2.33556e-09	2345.87	2904.3	2692.22	3652.52	3600.97	3346.12
ENSMUSG00000020456	Ogdh	TRUE	0.558647	14.3798	6.93137e-47	3.6896e-45	5317.97	5392.56	5625.7	3649.3	3641.9	3803.69
ENSMUSG00000031029	Eif3f	TRUE	-0.20071	-4.55594	5.2151e-06	2.72093e-05	3419.67	3177.5	3235.91	3649.3	3948.88	3700.89
ENSMUSG00000028936	Rpl22	TRUE	-0.290807	-6.11396	9.71859e-10	8.25613e-09	2989.76	3044.87	2967.56	3649.3	3828.88	3529.55
ENSMUSG00000039168	Dap	TRUE	0.21177	4.9627	6.95189e-07	4.14436e-06	4188.22	4333.78	4339.02	3648.22	3726.55	3729.11
ENSMUSG00000022770	Dlg1	TRUE	-0.0892672	-2.19605	0.0280882	0.0653289	3528.62	3366.81	3519.12	3648.22	3609.34	3827.88
ENSMUSG00000026667	Uhmk1	TRUE	-0.501962	-10.9024	1.12204e-27	3.23903e-26	2643.28	2378.31	2687.85	3644.99	3631.67	3655.54
ENSMUSG00000021488	Nsd1	TRUE	0.28695	4.58154	4.61556e-06	2.42847e-05	4798.73	3981.22	4580.27	3642.84	3566.55	3747.25
ENSMUSG00000074582	Arfgef2	TRUE	-0.124215	-2.07075	0.0383823	0.0853945	3479.55	3222.84	3688.69	3642.84	3661.43	4028.45
ENSMUSG00000033557	Fam20b	TRUE	0.0532754	1.35167	0.176482	0.291984	3670.95	3749.97	3894.98	3637.46	3567.48	3705.93
ENSMUSG00000032966	Fkbp1a	TRUE	0.250368	4.88096	1.05571e-06	6.11625e-06	4190.18	4550.29	4498.98	3629.93	3849.34	3647.47
ENSMUSG00000030662	Ipo5	TRUE	-0.34244	-8.43418	3.33544e-17	5.36637e-16	2806.21	2858.95	3019.14	3628.86	3680.04	3707.94
ENSMUSG00000042650	Alkbh5	TRUE	-0.328819	-7.02039	2.21252e-12	2.4547e-11	2946.57	2625.43	2813.72	3627.78	3448.41	3466.06
ENSMUSG00000031749	St3gal2	TRUE	0.287036	6.82306	8.91192e-12	9.35502e-11	4474.83	4470.94	4729.75	3626.7	3785.16	3798.65
ENSMUSG00000022676	Snai2	TRUE	-0.110313	-2.32135	0.0202681	0.0493742	3264.59	3329.4	3640.62	3626.7	3672.6	3755.31
ENSMUSG00000058569	Tmed9	TRUE	-0.0690876	-1.63252	0.10257	0.189989	3420.66	3464.3	3553.21	3624.55	3790.74	3534.59
ENSMUSG00000002602	Axl	TRUE	0.565398	10.2455	1.24008e-24	3.08703e-23	4998.97	5835.8	5722.72	3623.48	3811.2	3751.28
ENSMUSG00000018076	Med13l	TRUE	-0.0220222	-0.46456	0.642247	0.757177	3606.17	3329.4	3707.92	3621.32	3457.71	3739.19
ENSMUSG00000057522	Spop	TRUE	-0.0417791	-1.13869	0.254834	0.388633	3531.57	3534.58	3469.3	3619.17	3625.15	3598.09
ENSMUSG00000034165	Ccnd3	TRUE	-0.0708912	-1.26436	0.206101	0.329793	2950.5	3476.77	3443.07	3617.02	3432.59	3317.9
ENSMUSG00000002741	Ykt6	TRUE	0.006789	0.174355	0.861587	0.9144	3565.92	3660.41	3649.36	3615.95	3708.88	3497.3
ENSMUSG00000001280	Sp1	TRUE	-0.067896	-1.40325	0.160541	0.270683	3539.42	3221.71	3640.62	3604.11	3629.81	3678.72
ENSMUSG00000032402	Smad3	TRUE	-0.227987	-6.00472	1.91663e-09	1.57733e-08	3091.84	3099.28	3048.85	3603.04	3512.6	3705.93
ENSMUSG00000021140	Pcnx	TRUE	-0.0335822	-0.622712	0.533474	0.667872	3443.23	3166.16	3574.19	3598.73	3295.85	3539.63
ENSMUSG00000019975	Ikbip	TRUE	0.0871535	2.32539	0.0200513	0.0489111	3841.73	3832.72	3867.88	3596.58	3640.04	3629.33
ENSMUSG00000060904	Arl1	TRUE	0.0970681	2.38104	0.0172637	0.0429973	3870.2	3684.22	3802.33	3589.05	3599.11	3432.8
ENSMUSG00000041801	Phlda3	TRUE	0.0244707	0.516224	0.605698	0.728201	3523.72	3829.32	3640.62	3586.9	3716.32	3499.32
ENSMUSG00000032293	Ireb2	TRUE	-0.134675	-2.8964	0.00377466	0.0114606	3291.09	2976.85	3318.08	3582.59	3441.9	3511.41
ENSMUSG00000054611	Kdm2a	TRUE	-0.165872	-3.89062	9.99883e-05	0.00042471	3279.31	3053.93	3325.07	3582.59	3551.67	3710.97
ENSMUSG00000034781	Gna11	TRUE	-0.135843	-3.13234	0.00173419	0.00574529	3158.59	3244.38	3063.71	3581.52	3339.57	3478.15
ENSMUSG00000030447	Cyfip1	TRUE	-0.220269	-5.54916	2.87053e-08	2.0756e-07	3113.43	3145.76	3238.53	3581.52	3663.29	3821.83
ENSMUSG00000027339	Rassf2	TRUE	0.520752	8.40469	4.28997e-17	6.82893e-16	5197.24	4695.4	5376.58	3577.21	3549.8	3520.48
ENSMUSG00000033960	9430020K01Rik	TRUE	0.112587	2.48425	0.0129826	0.0336408	3965.41	3920.01	4214.03	3576.14	3668.88	3950.84
ENSMUSG00000028960	Ube4b	TRUE	-0.220209	-5.21715	1.81696e-07	1.17664e-06	3202.75	3017.66	3218.43	3567.53	3642.83	3791.6
ENSMUSG00000096210	H1f0	TRUE	0.334238	6.47059	9.76212e-11	9.2221e-10	4863.51	4320.17	4498.98	3566.46	3763.76	3523.5
ENSMUSG00000087365	C430049B03Rik	FALSE	0.747602	7.94461	1.94807e-15	2.76918e-14	450.525	484.05	481.628	280.798	294.887	267.085
ENSMUSG00000003345	Csnk1g2	TRUE	-0.0309217	-0.666458	0.505118	0.642667	3254.78	3710.29	3606.53	3565.38	3658.64	3571.88
ENSMUSG00000027652	Ralgapb	TRUE	-0.28824	-6.63486	3.2482e-11	3.22692e-10	2978.96	2707.05	2975.43	3560	3533.06	3495.28
ENSMUSG00000000538	Tom1l2	TRUE	-0.0207195	-0.446309	0.655374	0.76677	3427.53	3418.96	3540.1	3557.85	3517.25	3465.05
ENSMUSG00000041236	Vps41	TRUE	-0.0580251	-1.2695	0.204263	0.327248	3645.43	3312.4	3424.72	3556.77	3609.34	3645.46
ENSMUSG00000019873	Reep3	TRUE	-0.103734	-2.47258	0.0134141	0.034574	3232.2	3221.71	3381.01	3555.7	3463.29	3555.76
ENSMUSG00000056481	Cd248	TRUE	0.859192	17.0417	4.0303e-65	3.51737e-63	7074.92	6403.74	6748.04	3554.62	3733.06	3863.16
ENSMUSG00000074513	Arfip1	TRUE	-0.118867	-3.08856	0.00201132	0.00655633	3208.64	3333.93	3375.77	3552.47	3605.62	3612.2
ENSMUSG00000021613	Hapln1	TRUE	-0.27503	-4.05907	4.92691e-05	0.00022163	2940.68	2784.14	2963.19	3551.39	3565.62	3398.53
ENSMUSG00000029169	Dhx15	TRUE	-0.0955056	-2.48105	0.0130997	0.0339034	3312.69	3497.17	3404.61	3549.24	3693.06	3664.61
ENSMUSG00000060510	Zfp266	TRUE	-0.187095	-2.96785	0.00299888	0.00933366	3324.46	2734.26	3275.25	3546.01	3611.2	3478.15
ENSMUSG00000001288	Rarg	TRUE	0.00968833	0.23628	0.813215	0.880939	3562	3601.47	3631	3543.86	3643.76	3533.58
ENSMUSG00000020250	Txnrd1	TRUE	-0.167385	-4.04609	5.20811e-05	0.000232884	3054.54	3282.92	3180.84	3538.48	3589.81	3555.76
ENSMUSG00000032187	Smarca4	TRUE	-0.0631974	-1.4613	0.143933	0.247715	3379.43	3497.17	3583.8	3538.48	3570.27	3821.83
ENSMUSG00000022698	Naa50	TRUE	-0.0597345	-1.45248	0.146368	0.250929	3426.54	3277.25	3415.98	3537.41	3614.92	3398.53
ENSMUSG00000085389	1700003M07Rik	FALSE	0.738101	2.45428	0.0141167	0.0361492	42.2061	37.409	45.4531	26.8964	22.3258	26.2046
ENSMUSG00000025745	Hadha	TRUE	-0.000699618	-0.0185485	0.985201	0.991329	3603.22	3601.47	3603.03	3536.33	3635.39	3639.41
ENSMUSG00000021067	Sav1	TRUE	-0.173149	-3.84659	0.000119775	0.000503203	3108.53	3331.67	3225.42	3534.18	3628.88	3730.12
ENSMUSG00000038976	Ppp1r9b	TRUE	0.331596	9.06867	1.2048e-19	2.21633e-18	4377.65	4500.42	4572.41	3530.95	3538.64	3620.26
ENSMUSG00000005312	Ubqln1	TRUE	-0.237449	-5.66725	1.4511e-08	1.07972e-07	2946.57	2889.56	3110.92	3530.95	3487.48	3538.62
ENSMUSG00000022141	Nipbl	TRUE	-0.270195	-4.7289	2.25741e-06	1.24489e-05	3046.69	2671.91	3084.69	3526.65	3498.64	3601.11
ENSMUSG00000026466	Tor1aip1	TRUE	-0.106299	-1.76339	0.0778353	0.15265	3135.03	3212.64	3348.67	3519.12	3426.08	3495.28
ENSMUSG00000071076	Jund	TRUE	-0.311287	-5.77741	7.58571e-09	5.80965e-08	2675.67	2761.46	2866.17	3518.04	3567.48	3219.13
ENSMUSG00000031446	Cul4a	TRUE	-0.0973686	-2.3511	0.0187179	0.0460764	3397.1	3165.03	3215.81	3514.82	3423.29	3526.53
ENSMUSG00000028277	Ube2j1	TRUE	-0.174111	-4.27472	1.91378e-05	9.19286e-05	3156.62	3114.02	3136.26	3513.74	3524.69	3575.91
ENSMUSG00000040618	Pck2	TRUE	-1.653	-28.5599	2.11654e-179	9.07756e-177	1152.32	1112.07	1152.94	3512.66	3838.18	3398.53
ENSMUSG00000016256	Ctsz	TRUE	0.378082	9.97652	1.93122e-23	4.50849e-22	4445.38	4518.55	4621.36	3509.44	3393.52	3554.75
ENSMUSG00000048154	Mll2	TRUE	-0.153204	-1.24754	0.212198	0.337141	3164.47	2818.14	3690.44	3502.98	3592.6	3664.61
ENSMUSG00000068747	Sort1	TRUE	-0.467911	-7.92301	2.31828e-15	3.27681e-14	2668.8	2408.91	2539.26	3499.75	3414.92	3625.3
ENSMUSG00000005533	Igf1r	TRUE	-0.5589	-10.3529	4.06023e-25	1.04363e-23	2418.51	2255.88	2652.01	3499.75	3567.48	3739.19
ENSMUSG00000094483	Purb	TRUE	0.0812459	1.61662	0.105961	0.194972	3602.24	3586.73	4003.37	3498.68	3521.9	3565.84
ENSMUSG00000040720	1110037F02Rik	TRUE	-0.141475	-3.17924	0.00147661	0.00497428	3284.22	3075.47	3331.19	3496.53	3610.27	3589.02
ENSMUSG00000020923	Ubtf	TRUE	0.28443	7.3471	2.02552e-13	2.454e-12	4231.4	4289.56	4238.5	3494.37	3373.99	3609.17
ENSMUSG00000027187	Cat	TRUE	0.0856096	1.9876	0.0468555	0.100708	3879.03	3556.12	3716.67	3494.37	3448.41	3571.88
ENSMUSG00000049807	Arhgap23	TRUE	0.0809798	1.78075	0.0749528	0.148003	3554.14	3633.21	3844.28	3493.3	3485.62	3454.97
ENSMUSG00000018217	Pmp22	TRUE	-0.00983049	-0.193321	0.846708	0.903335	3759.29	3286.32	3559.33	3492.22	3514.46	3676.7
ENSMUSG00000020256	Aldh1l2	TRUE	-2.70263	-45.6519	0	0	551.624	496.519	538.445	3480.39	3386.08	3484.2
ENSMUSG00000040549	Ckap5	TRUE	-0.32559	-5.27067	1.35926e-07	8.96083e-07	2952.46	2501.87	3006.9	3477.16	3512.6	3624.29
ENSMUSG00000029447	Cct6a	TRUE	-0.0891253	-2.07126	0.0383341	0.0853252	3166.44	3304.46	3465.8	3469.63	3491.2	3613.2
ENSMUSG00000037608	Bclaf1	TRUE	-0.183827	-4.24216	2.21376e-05	0.000105261	3098.71	3019.93	2934.35	3468.55	3439.11	3373.33
ENSMUSG00000054364	Rhob	TRUE	0.401991	9.31766	1.18932e-20	2.34291e-19	4688.8	4434.67	4579.4	3466.4	3559.11	3346.12
ENSMUSG00000059208	Hnrnpm	TRUE	0.0683732	1.69026	0.0909785	0.173023	3766.16	3740.9	3679.08	3459.95	3595.39	3609.17
ENSMUSG00000022781	Pak2	TRUE	-0.122488	-3.26362	0.00109997	0.00381244	3117.36	3229.64	3300.59	3458.87	3498.64	3546.69
ENSMUSG00000064210	Ano6	TRUE	0.267645	6.21814	5.03095e-10	4.42152e-09	4175.46	4285.03	4305.81	3456.72	3446.55	3701.9
ENSMUSG00000026229	Psmd1	TRUE	-0.102777	-2.53601	0.0112122	0.0296942	3188.03	3180.9	3124.03	3454.57	3381.43	3357.21
ENSMUSG00000032042	Srpr	TRUE	-0.116433	-2.77776	0.00547357	0.0159325	3152.7	3333.93	3233.29	3453.49	3478.18	3601.11
ENSMUSG00000041571	Sepw1	TRUE	-0.211831	-3.55317	0.000380621	0.00145419	3113.43	3022.19	2945.71	3444.88	3693.06	3376.36
ENSMUSG00000038128	Camk4	TRUE	-0.16176	-2.24291	0.0249029	0.059055	3128.16	2800.01	3404.61	3441.66	3425.15	3580.95
ENSMUSG00000031217	Efnb1	TRUE	0.260366	5.91585	3.30164e-09	2.62784e-08	4065.52	4141.06	4339.9	3439.51	3653.99	3381.4
ENSMUSG00000029461	Fam168a	TRUE	0.0470128	0.981609	0.326293	0.4679	3609.11	3365.68	3715.79	3438.43	3399.11	3518.47
ENSMUSG00000034320	Slc26a2	TRUE	-0.378724	-7.22414	5.04282e-13	5.93708e-12	2785.6	2428.18	2680.86	3434.13	3433.52	3405.58
ENSMUSG00000021610	Clptm1l	TRUE	-0.0258086	-0.660938	0.508652	0.645889	3283.24	3380.41	3250.77	3429.82	3291.2	3370.31
ENSMUSG00000010663	Fads1	TRUE	0.156597	3.95005	7.81349e-05	0.000338592	3598.31	3893.94	3835.54	3425.52	3382.36	3353.18
ENSMUSG00000074813	Gm14005	FALSE	0.714072	2.90771	0.00364087	0.0110791	46.1322	88.4213	75.1724	33.3515	53.9541	39.3068
ENSMUSG00000028893	Sesn2	TRUE	-0.64455	-13.3922	6.7124e-41	3.02582e-39	2277.17	2097.17	2336.46	3422.29	3534.92	3544.67
ENSMUSG00000023068	Nus1	TRUE	-0.128999	-3.55486	0.000378177	0.00144646	3090.86	3104.95	3159.87	3420.14	3420.5	3392.48
ENSMUSG00000030341	Tnfrsf1a	TRUE	0.400211	8.42736	3.53538e-17	5.66983e-16	4359	4913.05	4818.9	3417.99	3574.92	3680.73
ENSMUSG00000024242	Map4k3	TRUE	0.176528	4.24528	2.18323e-05	0.000103908	3819.16	3923.41	3965.78	3415.84	3439.11	3505.36
ENSMUSG00000020687	Cdc27	TRUE	-0.132555	-3.32318	0.000889985	0.00315499	3134.05	3063	3263.88	3414.76	3529.34	3432.8
ENSMUSG00000031983	2310022B05Rik	TRUE	0.381995	10.2671	9.90946e-25	2.50422e-23	4513.11	4447.14	4539.19	3412.61	3427.01	3521.49
ENSMUSG00000097769	AC121821.1	FALSE	0.711852	2.86977	0.00410776	0.0123669	63.7999	63.4819	63.8092	29.0481	42.7912	44.3462
ENSMUSG00000070576	Mn1	TRUE	-0.0661436	-1.15493	0.248118	0.380946	3615	3001.79	3282.24	3411.53	3373.06	3584.98
ENSMUSG00000022789	Dnm1l	TRUE	-0.197947	-4.91115	9.0543e-07	5.29466e-06	3041.78	2983.65	2983.3	3407.23	3522.83	3401.55
ENSMUSG00000028464	Tpm2	TRUE	1.14895	23.8923	3.68671e-126	7.79453e-124	7306.56	7833.22	7501.51	3405.08	3519.11	3282.62
ENSMUSG00000036545	Adamts2	TRUE	0.727158	15.5462	1.68947e-54	1.13725e-52	5974.61	5624.95	5790.03	3402.93	3428.87	3674.68
ENSMUSG00000028926	Cdk14	TRUE	0.256498	5.54233	2.98467e-08	2.15191e-07	4238.28	3990.29	4311.05	3401.85	3426.08	3674.68
ENSMUSG00000097960	RP23-418G1.1	FALSE	0.703574	3.46738	0.000525556	0.0019513	126.618	102.025	114.507	69.9305	73.4891	67.5271
ENSMUSG00000046876	Atxn1	TRUE	-0.0955679	-1.8534	0.0638245	0.129855	3136.99	2992.72	3167.73	3401.85	3345.15	3191.92
ENSMUSG00000057880	Abat	TRUE	0.0104946	0.1942	0.846019	0.903026	3486.42	3484.7	3816.31	3395.4	3596.32	3721.05
ENSMUSG00000024425	Ndfip1	TRUE	-0.15246	-3.53919	0.000401364	0.00152683	3156.62	2991.59	3074.2	3394.32	3533.99	3322.94
ENSMUSG00000046020	Pofut1	TRUE	-0.246716	-6.16163	7.20009e-10	6.2044e-09	2819.95	2828.35	2955.33	3394.32	3423.29	3395.51
ENSMUSG00000022037	Clu	TRUE	0.61946	9.77259	1.47624e-22	3.22559e-21	5246.31	5160.17	5394.06	3392.17	3418.64	3475.13
ENSMUSG00000045414	1190002N15Rik	TRUE	-0.231745	-5.3203	1.03595e-07	6.94224e-07	2934.79	2796.61	2999.03	3391.09	3351.66	3517.46
ENSMUSG00000002812	Flii	TRUE	0.000293655	0.00727072	0.994199	0.996911	3394.15	3418.96	3598.66	3390.02	3482.83	3540.64
ENSMUSG00000019471	Cdc37	TRUE	-0.0431475	-0.888883	0.374066	0.517426	3360.78	3558.39	3508.63	3388.94	3696.78	3653.52
ENSMUSG00000021870	Slmap	TRUE	-0.0939753	-2.38371	0.017139	0.0427491	3119.32	3063	3254.27	3385.71	3364.69	3328.99
ENSMUSG00000025873	Faf2	TRUE	-0.256737	-6.05201	1.43053e-09	1.19298e-08	2778.73	2823.81	2956.2	3384.64	3385.15	3461.02
ENSMUSG00000054455	Vapb	TRUE	-0.061242	-1.46828	0.142028	0.245338	3248.89	3276.12	3299.72	3374.95	3493.99	3380.39
ENSMUSG00000044791	Setd2	TRUE	-0.0878142	-1.45908	0.144544	0.248625	3406.91	2984.78	3460.55	3374.95	3433.52	3669.65
ENSMUSG00000027303	Ptpra	TRUE	-0.108868	-2.77509	0.00551867	0.0160482	3176.25	3125.35	3037.49	3373.88	3258.64	3437.84
ENSMUSG00000031592	Pcm1	TRUE	-0.313387	-5.28132	1.28256e-07	8.48875e-07	2961.3	2450.86	2857.43	3372.8	3502.36	3409.62
ENSMUSG00000021794	Glud1	TRUE	0.00979888	0.255422	0.798397	0.872696	3460.9	3468.83	3519.12	3372.8	3473.53	3531.57
ENSMUSG00000002222	Rmnd5a	TRUE	-0.288241	-6.69747	2.12057e-11	2.1479e-10	2754.19	2760.33	2719.32	3369.57	3319.1	3365.27
ENSMUSG00000032560	Dnajc13	TRUE	-0.136566	-2.76745	0.00564969	0.0163721	3122.27	2920.17	3206.19	3365.27	3253.99	3556.76
ENSMUSG00000026904	Slc4a10	TRUE	0.0151404	0.277201	0.781626	0.861453	3232.2	3354.34	3625.76	3364.2	3438.18	3306.81
ENSMUSG00000041120	Nbl1	TRUE	-0.0384321	-0.777624	0.436791	0.578444	3279.31	3322.6	3193.95	3364.2	3386.08	3306.81
ENSMUSG00000031253	Srpx2	TRUE	0.309385	7.37511	1.64209e-13	2.01385e-12	4196.07	4167.14	4248.99	3359.89	3334.92	3485.21
ENSMUSG00000031232	Magt1	TRUE	-0.523766	-12.2264	2.24635e-34	8.14493e-33	2449.92	2293.28	2373.18	3354.51	3400.97	3480.17
ENSMUSG00000026814	Eng	TRUE	0.125766	2.50599	0.0122109	0.0319446	3398.08	3846.32	3744.64	3351.29	3267.94	3450.94
ENSMUSG00000000555	Itga5	TRUE	0.137995	2.2958	0.0216874	0.052415	3412.8	4093.45	3857.4	3351.29	3427.01	3544.67
ENSMUSG00000024608	Rps14	TRUE	-0.164745	-2.40421	0.0162074	0.040718	3222.38	2820.41	2700.96	3349.13	3347.01	3104.23
ENSMUSG00000025950	Idh1	TRUE	0.273959	5.71136	1.12078e-08	8.43312e-08	4273.61	3867.86	3920.33	3346.98	3238.17	3393.49
ENSMUSG00000057133	Chd6	TRUE	-0.293431	-4.76856	1.85547e-06	1.03618e-05	2859.22	2476.93	2931.73	3345.91	3283.76	3513.43
ENSMUSG00000038429	Usp5	TRUE	0.0372626	0.957537	0.338296	0.480478	3363.73	3411.02	3443.07	3345.91	3352.59	3259.44
ENSMUSG00000041935	AW549877	TRUE	-0.206856	-4.48026	7.45519e-06	3.81294e-05	2924.98	2694.58	2902.88	3341.6	3253.06	3250.37
ENSMUSG00000051790	Nlgn2	TRUE	0.297949	6.01969	1.74755e-09	1.44771e-08	3946.76	4187.54	3874.88	3339.45	3350.73	3072.99
ENSMUSG00000060279	Ap2a1	TRUE	0.032163	0.820286	0.412053	0.554987	3349.98	3417.82	3397.62	3337.3	3323.76	3279.6
ENSMUSG00000007872	Id3	TRUE	-0.0322826	-0.677434	0.498131	0.635945	3449.12	3242.11	3281.36	3336.22	3609.34	3250.37
ENSMUSG00000086266	Igf2as	FALSE	0.682932	2.83379	0.00459999	0.0136747	55.9476	78.2188	68.1797	49.4893	34.419	42.3304
ENSMUSG00000030120	Mlf2	TRUE	-0.0360077	-0.738236	0.460371	0.60129	3115.4	3366.81	3485.9	3336.22	3531.2	3352.17
ENSMUSG00000020883	Fbxl20	TRUE	-0.291811	-5.24621	1.55259e-07	1.01595e-06	2814.07	2514.34	2734.18	3331.92	3178.64	3367.29
ENSMUSG00000020290	Xpo1	TRUE	-0.265301	-5.22325	1.75807e-07	1.14096e-06	3047.67	2636.77	2770.02	3329.77	3388.87	3446.91
ENSMUSG00000041936	Agrn	TRUE	0.267388	1.96124	0.0498513	0.106043	3615	3998.23	4228.01	3327.62	3273.52	3237.27
ENSMUSG00000013698	Pea15a	TRUE	0.0146977	0.29921	0.76478	0.850504	3159.57	3592.4	3288.36	3326.54	3290.27	3314.88
ENSMUSG00000028413	B4galt1	TRUE	0.293192	6.65302	2.87134e-11	2.87153e-10	4344.28	3897.34	4144.97	3325.46	3373.06	3414.66
ENSMUSG00000032024	Clmp	TRUE	0.400603	10.1314	4.00866e-24	9.73689e-23	4389.43	4384.79	4346.02	3324.39	3315.38	3298.75
ENSMUSG00000033335	Dnm2	TRUE	-0.299486	-6.90871	4.89077e-12	5.25145e-11	2756.16	2826.08	2810.23	3319.01	3423.29	3583.98
ENSMUSG00000057335	Cep170	TRUE	-0.13056	-2.52445	0.0115879	0.0305705	3038.84	2785.27	3080.32	3314.71	3133.99	3308.83
ENSMUSG00000019428	Fkbp8	TRUE	0.0423406	1.06583	0.286501	0.424506	3303.85	3466.57	3384.51	3312.55	3349.8	3194.94
ENSMUSG00000004473	Clec11a	TRUE	1.51677	33.8137	1.24263e-250	1.33237e-247	10041.1	9464.48	9862.45	3308.25	3568.41	3384.42
ENSMUSG00000040850	Psme4	TRUE	-0.161932	-3.84433	0.000120884	0.000507577	2983.87	2806.81	3030.5	3306.1	3227.94	3345.11
ENSMUSG00000013787	Ehmt2	TRUE	0.368455	9.23746	2.52411e-20	4.85761e-19	4083.19	4271.43	4113.51	3301.8	3237.24	3116.33
ENSMUSG00000019432	Ddx39b	TRUE	-0.0324085	-0.693825	0.487792	0.626719	3091.84	3346.4	3052.35	3301.8	3263.29	3133.46
ENSMUSG00000041638	Gcn1l1	TRUE	-0.148139	-3.06081	0.0022074	0.00713506	2959.33	2864.62	3085.57	3300.72	3251.2	3327.98
ENSMUSG00000002413	Braf	TRUE	-0.573373	-8.15255	3.56327e-16	5.33815e-15	2380.23	1910.13	2473.7	3298.57	3373.99	3405.58
ENSMUSG00000036356	Csgalnact1	TRUE	-0.732693	-15.8642	1.12065e-56	7.97252e-55	2108.34	1861.38	1973.71	3298.57	3267.01	3319.92
ENSMUSG00000004364	Cul3	TRUE	-0.151968	-3.60603	0.000310923	0.00121165	3021.17	3014.26	2985.92	3296.42	3286.55	3439.85
ENSMUSG00000052920	Prkg1	TRUE	-0.423941	-7.27273	3.52301e-13	4.20715e-12	2433.23	2244.54	2559.36	3295.34	3203.75	3220.14
ENSMUSG00000001416	Cct3	TRUE	-0.0262074	-0.613639	0.539454	0.67285	3214.53	3445.03	3360.91	3293.19	3447.48	3457.99
ENSMUSG00000020029	Nudt4	TRUE	0.132423	3.41601	0.000635454	0.00232031	3571.81	3740.9	3761.24	3287.81	3363.76	3449.93
ENSMUSG00000053754	Chd8	TRUE	-0.169474	-3.21884	0.0012871	0.00438708	3049.63	2724.05	3074.2	3285.66	3341.43	3332.01
ENSMUSG00000020000	Moxd1	TRUE	-1.19811	-24.6926	1.285e-134	3.21485e-132	1382	1479.36	1542.78	3285.66	3378.64	3444.89
ENSMUSG00000030870	Ubfd1	TRUE	0.0343657	0.843703	0.398835	0.542637	3346.06	3448.43	3391.5	3284.58	3273.52	3386.43
ENSMUSG00000021957	Tkt	TRUE	0.0334927	0.894865	0.370859	0.51427	3279.31	3349.81	3326.82	3283.51	3193.52	3251.38
ENSMUSG00000024308	Tapbp	TRUE	0.649016	10.7265	7.64048e-27	2.14376e-25	4986.21	5238.39	5326.75	3282.43	3306.08	3328.99
ENSMUSG00000028041	Adam15	TRUE	0.1663	3.90141	9.56324e-05	0.000407707	3551.2	3743.17	3586.43	3282.43	3124.68	3287.66
ENSMUSG00000037373	Ctbp1	TRUE	-0.11327	-2.59367	0.0094957	0.0257594	2832.71	3033.53	2995.53	3280.28	3225.15	3079.04
ENSMUSG00000021156	Zmynd11	TRUE	-0.153785	-3.55321	0.000380553	0.00145419	2927.92	2941.71	3025.25	3279.2	3280.96	3338.06
ENSMUSG00000033444	Specc1l	TRUE	0.0679419	1.37634	0.168718	0.281715	3504.09	3247.78	3568.94	3279.2	3195.38	3379.38
ENSMUSG00000046062	Ppp1r15b	TRUE	-0.22792	-4.54153	5.58476e-06	2.90481e-05	2546.11	2725.19	2955.33	3275.98	3173.99	3191.92
ENSMUSG00000025860	Xiap	TRUE	-0.0689015	-1.42747	0.153444	0.260618	3013.32	2887.29	3092.56	3275.98	3120.96	3043.76
ENSMUSG00000026421	Csrp1	TRUE	0.733789	15.1935	3.90612e-52	2.50576e-50	5396.49	5609.08	5769.05	3274.9	3457.71	3353.18
ENSMUSG00000038400	Pmepa1	TRUE	-0.582974	-8.64257	5.49616e-18	9.24921e-17	2179.99	2451.99	2321.6	3274.9	3618.64	3516.45
ENSMUSG00000029093	Sorcs2	TRUE	-0.568673	-12.8915	5.02871e-38	2.06811e-36	2262.44	2169.72	2321.6	3273.82	3343.29	3407.6
ENSMUSG00000022799	Arhgap31	TRUE	0.0950389	1.91239	0.055826	0.116438	3274.41	3483.57	3729.78	3272.75	3166.55	3385.43
ENSMUSG00000029004	Mll5	TRUE	-0.210317	-4.83018	1.36407e-06	7.7649e-06	2681.56	2795.47	2888.89	3271.67	3179.57	3232.23
ENSMUSG00000034120	Srsf2	TRUE	-0.0141447	-0.296069	0.767177	0.851845	2975.04	3311.26	3141.51	3270.6	3152.59	3094.15
ENSMUSG00000066232	Ipo7	TRUE	-0.274134	-6.51367	7.33384e-11	7.02541e-10	2572.61	2684.38	2772.64	3267.37	3235.38	3211.07
ENSMUSG00000025326	Ube3a	TRUE	-0.338644	-5.70168	1.18634e-08	8.913e-08	2591.26	2247.94	2788.37	3267.37	3138.64	3254.4
ENSMUSG00000037458	Azin1	TRUE	0.0698556	1.68355	0.092268	0.174768	3260.66	3435.96	3550.59	3267.37	3283.76	3214.09
ENSMUSG00000078578	Ube2d3	TRUE	-0.00373649	-0.0927293	0.926119	0.957101	3145.83	3405.35	3321.57	3265.22	3307.94	3320.92
ENSMUSG00000020271	Fbxw11	TRUE	-0.312457	-7.74404	9.63077e-15	1.30476e-13	2528.44	2599.36	2659.01	3264.14	3241.89	3166.72
ENSMUSG00000005881	Ergic3	TRUE	0.00387151	0.0891184	0.928988	0.958619	3183.12	3301.06	3285.74	3257.69	3282.83	3202
ENSMUSG00000018583	G3bp1	TRUE	-0.214172	-5.26205	1.42459e-07	9.36273e-07	2737.51	2916.77	2829.46	3255.53	3338.64	3241.3
ENSMUSG00000039007	Cpq	TRUE	-0.258198	-6.36996	1.89073e-10	1.73589e-09	2713.95	2845.35	2715.82	3255.53	3271.66	3363.25
ENSMUSG00000057113	Npm1	TRUE	-0.431602	-8.25866	1.47318e-16	2.25421e-15	2520.59	2439.52	2346.95	3253.38	3396.32	3200.99
ENSMUSG00000033228	Scaf11	TRUE	-0.238572	-4.95987	7.05415e-07	4.20365e-06	2709.04	2601.63	2796.24	3251.23	3196.31	3124.39
ENSMUSG00000028149	Rap1gds1	TRUE	-0.328165	-8.42385	3.64318e-17	5.82404e-16	2582.42	2611.83	2649.39	3246.93	3240.96	3361.24
ENSMUSG00000097006	AC122821.1	FALSE	0.652652	3.4917	0.000479958	0.00179667	144.286	107.693	122.374	88.22	78.1404	72.5665
ENSMUSG00000097806	RP23-59P17.2	FALSE	0.652103	3.329	0.000871595	0.00309816	99.1352	126.964	118.003	84.9925	72.5589	61.4799
ENSMUSG00000007670	Khsrp	TRUE	-0.0374824	-0.864942	0.387071	0.530526	3128.16	3170.7	3298.85	3246.93	3348.87	3256.42
ENSMUSG00000024913	Lrp5	TRUE	-0.125396	-2.65132	0.00801786	0.0222182	3000.56	3136.69	3181.72	3244.78	3315.38	3605.14
ENSMUSG00000028514	Usp24	TRUE	-0.207975	-4.39106	1.128e-05	5.61231e-05	2772.84	2700.25	2929.98	3243.7	3187.94	3282.62
ENSMUSG00000032580	Rbm5	TRUE	0.0808601	1.3866	0.165565	0.277569	3508.01	3341.87	3009.52	3243.7	2986.08	3090.12
ENSMUSG00000044147	Arf6	TRUE	0.256158	4.61313	3.96644e-06	2.11136e-05	3447.16	4058.31	4082.91	3240.47	3227.01	3235.25
ENSMUSG00000021143	Pacs2	TRUE	-0.113039	-2.47287	0.0134031	0.0345576	2889.64	3184.3	3164.24	3239.4	3358.18	3390.47
ENSMUSG00000039844	Rapgef1	TRUE	0.0359665	0.834483	0.404009	0.547345	3239.07	3267.05	3402.86	3236.17	3125.61	3308.83
ENSMUSG00000031902	Nfatc3	TRUE	-0.260775	-5.67002	1.42783e-08	1.06421e-07	2817.99	2584.62	2764.77	3231.87	3228.87	3332.01
ENSMUSG00000019173	Rab5c	TRUE	-0.0104954	-0.243089	0.807936	0.877945	3193.92	3255.72	3381.01	3228.64	3343.29	3332.01
ENSMUSG00000058881	Zfp516	TRUE	-0.429853	-7.52393	5.31528e-14	6.72746e-13	2523.53	2165.19	2502.54	3225.41	3139.57	3334.03
ENSMUSG00000049076	Acap2	TRUE	0.0010815	0.023047	0.981613	0.989243	3288.15	2980.25	3217.56	3222.18	3088.4	3176.8
ENSMUSG00000026341	Actr3	TRUE	0.171741	4.44526	8.77851e-06	4.43386e-05	3491.33	3593.53	3679.08	3221.11	3136.78	3202
ENSMUSG00000032009	Sesn3	TRUE	-0.113643	-1.55516	0.119908	0.215175	3081.04	2448.59	3132.77	3218.96	2987.01	3176.8
ENSMUSG00000026623	Lpgat1	TRUE	0.154616	3.82275	0.000131971	0.000549509	3676.84	3435.96	3658.1	3214.65	3185.15	3283.63
ENSMUSG00000022477	Aco2	TRUE	-0.127957	-2.80878	0.00497289	0.014634	3103.62	3133.29	3208.81	3214.65	3461.43	3644.45
ENSMUSG00000042524	Sun2	TRUE	0.0610057	1.53147	0.125653	0.223108	3263.61	3260.25	3409.86	3213.58	3210.27	3103.22
ENSMUSG00000025647	Shisa5	TRUE	0.177504	2.55653	0.0105722	0.0282183	3413.78	3683.09	3709.67	3211.42	3206.55	3137.49
ENSMUSG00000015714	Cers2	TRUE	-0.148115	-3.37079	0.000749537	0.00269557	2705.12	2942.84	2879.28	3209.27	3088.4	3150.59
ENSMUSG00000021188	Trip11	TRUE	-0.193896	-3.57576	0.000349217	0.00134585	2870.01	2549.48	2882.78	3209.27	3104.22	3192.92
ENSMUSG00000022800	Fyttd1	TRUE	-0.189711	-4.22427	2.39719e-05	0.000113372	2651.13	2849.89	2716.7	3208.2	3125.61	3034.69
ENSMUSG00000026116	Tmem131	TRUE	-0.363617	-7.65295	1.96422e-14	2.57961e-13	2643.28	2461.06	2645.02	3204.97	3353.52	3417.68
ENSMUSG00000056999	Ide	TRUE	-0.350408	-7.52155	5.41317e-14	6.83982e-13	2548.07	2379.44	2642.4	3198.51	3172.13	3291.7
ENSMUSG00000033943	Mga	TRUE	-0.112537	-1.66355	0.0962027	0.18067	3129.14	2593.69	3211.44	3197.44	3131.2	3340.07
ENSMUSG00000074746	Pdzd8	TRUE	-0.466351	-10.1587	3.03075e-24	7.45813e-23	2420.47	2194.66	2458.84	3196.36	3263.29	3325.96
ENSMUSG00000066568	Lsm14a	TRUE	-0.224812	-5.27644	1.31719e-07	8.70262e-07	2720.82	2566.48	2777.88	3193.13	3088.4	3154.63
ENSMUSG00000039607	Rbms3	TRUE	0.025075	0.577122	0.563857	0.693094	3495.25	3166.16	3326.82	3192.06	3283.76	3344.1
ENSMUSG00000034850	Tmem127	TRUE	0.0455314	1.12494	0.260612	0.395277	3441.27	3421.22	3371.4	3189.91	3307.94	3414.66
ENSMUSG00000022314	Rad21	TRUE	-0.0612071	-1.48495	0.137558	0.239602	3101.66	3006.32	3091.69	3189.91	3081.89	3332.01
ENSMUSG00000004562	Arhgef40	TRUE	0.482427	10.6735	1.35363e-26	3.72833e-25	4384.52	4872.24	4437.8	3185.6	3240.03	3369.3
ENSMUSG00000000194	Gpr107	TRUE	-0.117299	-3.03471	0.00240765	0.00769944	2950.5	2877.09	3002.53	3185.6	3205.62	3191.92
ENSMUSG00000026554	Dcaf8	TRUE	-0.00556551	-0.126218	0.899559	0.940078	3263.61	3044.87	3216.68	3182.38	3157.24	3228.2
ENSMUSG00000000420	Galnt1	TRUE	-0.0525031	-1.32703	0.184497	0.302082	3136.01	2987.05	3177.35	3180.22	3241.89	3229.21
ENSMUSG00000027598	Itch	TRUE	-0.0944844	-2.05142	0.0402265	0.0888916	2911.24	2796.61	2959.7	3180.22	3017.71	3063.92
ENSMUSG00000075595	Zfp652	TRUE	-0.191708	-3.33333	0.000858141	0.00305612	2974.06	2575.55	2826.83	3177	3106.08	3290.69
ENSMUSG00000041459	Tardbp	TRUE	0.00908297	0.168355	0.866304	0.917655	3123.25	3414.42	2958.82	3175.92	3301.43	2949.02
ENSMUSG00000022994	Adcy6	TRUE	0.185177	4.25961	2.04784e-05	9.79465e-05	3603.22	3522.11	3510.38	3173.77	3157.24	3023.6
ENSMUSG00000003429	Rps11	TRUE	-0.00133347	-0.0239668	0.980879	0.988774	3359.8	3510.78	3415.98	3173.77	3572.13	3544.67
ENSMUSG00000039959	Hip1	TRUE	0.119893	2.47195	0.0134379	0.0346293	3373.54	3257.98	3487.65	3172.69	3012.12	3134.47
ENSMUSG00000037857	Nufip2	TRUE	-0.158362	-3.17414	0.00150283	0.00504562	2747.32	2671.91	3028.75	3172.69	3115.38	3150.59
ENSMUSG00000042364	Snx18	TRUE	-0.183931	-4.65519	3.2368e-06	1.74838e-05	2804.25	2794.34	2897.64	3170.54	3178.64	3306.81
ENSMUSG00000039910	Cited2	TRUE	-0.538691	-9.17511	4.51109e-20	8.53922e-19	2027.85	1988.34	2312.86	3169.47	3024.22	3012.52
ENSMUSG00000029673	Auts2	TRUE	0.193879	3.12597	0.00177219	0.00585698	3976.21	3268.19	3776.1	3168.39	3068.87	3404.58
ENSMUSG00000039367	Sec24c	TRUE	-0.0525503	-1.27955	0.200704	0.322704	3163.49	3063	3073.33	3167.31	3183.29	3294.72
ENSMUSG00000045827	Serpinb9	TRUE	-0.323674	-8.0064	1.18116e-15	1.70321e-14	2627.57	2491.67	2520.9	3165.16	3216.78	3180.83
ENSMUSG00000033295	Ptprf	TRUE	0.0644871	1.34277	0.179346	0.295355	3544.33	3355.47	3506.01	3164.09	3271.66	3517.46
ENSMUSG00000079562	Maea	TRUE	-0.170334	-4.03032	5.57e-05	0.000247517	2711.99	2917.9	2784.88	3158.71	3109.8	3195.95
ENSMUSG00000025240	Sacm1l	TRUE	-0.243001	-5.81215	6.16749e-09	4.76972e-08	2557.88	2645.84	2641.52	3158.71	3082.82	3043.76
ENSMUSG00000060002	Chpt1	TRUE	0.0352301	0.552663	0.580494	0.707095	3461.88	2926.97	3350.42	3152.25	3239.1	3118.34
ENSMUSG00000029190	D5Ertd579e	TRUE	-0.268775	-5.44003	5.3272e-08	3.70044e-07	2654.08	2473.53	2708.83	3147.95	3049.33	3253.4
ENSMUSG00000026965	Anapc2	TRUE	0.176233	4.38612	1.15389e-05	5.72595e-05	3475.62	3540.25	3569.82	3145.8	3030.73	3194.94
ENSMUSG00000025810	Nrp1	TRUE	-0.140882	-3.60072	0.000317333	0.00123279	2741.43	2890.69	2897.64	3145.8	3125.61	3133.46
ENSMUSG00000030224	Strap	TRUE	-0.136364	-3.50084	0.000463796	0.00174312	2837.62	2929.24	2777.88	3139.34	3127.47	3118.34
ENSMUSG00000006262	Mob1b	TRUE	-0.212153	-4.70811	2.50023e-06	1.36924e-05	2599.11	2589.16	2774.39	3139.34	3067.94	3024.61
ENSMUSG00000020661	Dnmt3a	TRUE	0.134633	2.63593	0.00839079	0.0231321	3353.91	3268.19	3505.13	3126.43	2997.24	3107.26
ENSMUSG00000021994	Wnt5a	TRUE	-0.362839	-8.85369	8.46748e-19	1.4936e-17	2489.18	2385.11	2443.1	3126.43	3131.2	3155.63
ENSMUSG00000013921	Clip3	TRUE	0.0338823	0.803299	0.421802	0.564328	3071.23	2994.99	3152.87	3123.2	2895.84	2995.38
ENSMUSG00000027962	Vcam1	TRUE	0.570011	11.6252	3.06855e-31	1.00792e-29	4946.94	4707.87	4868.73	3122.13	3269.8	3391.47
ENSMUSG00000024772	Ehd1	TRUE	0.256681	5.85278	4.83409e-09	3.78532e-08	3701.37	3948.35	3944.81	3121.05	3281.9	3298.75
ENSMUSG00000052534	Pbx1	TRUE	-0.0331921	-0.75539	0.450015	0.591573	3255.76	3098.14	3114.41	3121.05	3335.85	3229.21
ENSMUSG00000041308	Sntb2	TRUE	0.188351	3.16367	0.00155794	0.00521315	3655.24	3179.76	3808.45	3118.9	3041.89	3188.89
ENSMUSG00000036093	Arl5a	TRUE	-0.0879805	-2.11307	0.0345944	0.0782191	2974.06	2991.59	2981.55	3118.9	3134.92	3255.41
ENSMUSG00000058756	Thra	TRUE	0.238269	5.0166	5.25951e-07	3.18863e-06	3940.87	3604.87	3616.14	3116.75	3215.85	3129.43
ENSMUSG00000085156	Gm11974	FALSE	0.615755	3.44072	0.000580166	0.00213296	103.061	99.7573	97.899	68.8547	68.8379	58.4563
ENSMUSG00000017781	Pitpna	TRUE	0.128489	2.98263	0.00285782	0.00895028	3243	3557.26	3472.79	3116.75	3146.08	3131.44
ENSMUSG00000069516	Lyz2	TRUE	0.0698365	0.142707	0.886521	0.932098	1592.05	3073.21	1930.88	3116.75	1220.48	1947.2
ENSMUSG00000029231	Pdgfra	TRUE	0.325497	5.62823	1.82063e-08	1.3408e-07	4237.29	3708.02	3885.37	3113.52	3051.2	3279.6
ENSMUSG00000028646	Rragc	TRUE	-0.169155	-3.89021	0.000100159	0.000425316	2700.21	2794.34	2745.54	3112.45	3062.36	3089.11
ENSMUSG00000036707	Cab39	TRUE	-0.373075	-8.74144	2.30165e-18	3.95762e-17	2342.93	2506.4	2480.69	3111.37	3146.08	3233.24
ENSMUSG00000061410	Zcchc14	TRUE	-0.0179651	-0.392843	0.694435	0.796224	3047.67	3064.14	3179.97	3110.29	3120.03	3180.83
ENSMUSG00000022350	E430025E21Rik	TRUE	-0.156314	-3.80054	0.00014438	0.000598204	2787.56	2831.75	2849.56	3108.14	3084.68	3246.34
ENSMUSG00000028382	Ptbp3	TRUE	-0.343827	-7.70941	1.26397e-14	1.69255e-13	2379.24	2362.43	2457.09	3105.99	3040.03	2995.38
ENSMUSG00000074415	2610203C20Rik	FALSE	0.608868	4.56611	4.96856e-06	2.60143e-05	3153.68	3889.4	2667.75	2313.09	2092.12	1960.3
ENSMUSG00000019179	Mdh2	TRUE	-0.154322	-3.74895	0.000177576	0.000725529	2737.51	2809.08	2813.72	3100.61	3217.71	2983.29
ENSMUSG00000038127	Ccdc50	TRUE	-0.275737	-5.3738	7.70947e-08	5.24601e-07	2464.64	2396.44	2601.32	3098.46	2965.61	2978.25
ENSMUSG00000000838	Fmr1	TRUE	-0.562281	-13.6395	2.33164e-42	1.09719e-40	2120.12	2064.3	2137.17	3097.38	3146.08	3095.16
ENSMUSG00000029110	Rnf4	TRUE	-0.228248	-5.39883	6.70784e-08	4.59988e-07	2711	2760.33	2707.08	3093.08	3146.08	3338.06
ENSMUSG00000021814	Anxa7	TRUE	0.0262978	0.687645	0.491676	0.630298	3077.12	3200.17	3106.55	3090.93	3080.96	3038.72
ENSMUSG00000028809	Srrm1	TRUE	-0.0340583	-0.856463	0.391742	0.534725	3013.32	3026.73	2979.8	3090.93	3015.85	3128.42
ENSMUSG00000002233	Rhoc	TRUE	0.15481	3.34651	0.000818353	0.00292275	3360.78	3702.36	3473.67	3089.85	3229.8	3137.49
ENSMUSG00000039518	Cdsn	TRUE	-2.91495	-33.9448	1.45306e-252	1.67784e-249	393.596	408.098	408.204	3089.85	3135.85	2898.63
ENSMUSG00000060450	Rnf14	TRUE	-0.112492	-2.68869	0.00717324	0.020203	3013.32	2862.35	2882.78	3086.63	3209.34	3171.76
ENSMUSG00000049550	Clip1	TRUE	-0.118862	-2.48874	0.0128197	0.0332936	2751.25	2848.75	2891.52	3086.63	3001.89	3134.47
ENSMUSG00000043207	Zmpste24	TRUE	-0.203698	-5.22252	1.76504e-07	1.14499e-06	2669.78	2722.92	2700.96	3082.32	3148.87	3087.1
ENSMUSG00000004843	Chmp2b	TRUE	-0.0951071	-2.31136	0.0208129	0.0505537	2783.64	2770.53	2815.47	3082.32	2893.05	2970.19
ENSMUSG00000038467	Chmp4b	TRUE	-0.00495118	-0.111696	0.911065	0.947419	3073.19	3099.28	3163.36	3081.25	3211.2	3075
ENSMUSG00000053841	Txlna	TRUE	0.0720543	1.69386	0.0902912	0.171913	3218.46	3250.05	3317.2	3080.17	3000.96	3231.22
ENSMUSG00000021816	Ppp3cb	TRUE	-0.241625	-5.62594	1.84502e-08	1.35696e-07	2683.52	2665.11	2742.05	3075.87	3257.71	3232.23
ENSMUSG00000025266	Gnl3l	TRUE	-0.327111	-6.87396	6.24447e-12	6.62443e-11	2323.3	2432.72	2553.24	3072.64	3121.89	2978.25
ENSMUSG00000052727	Map1b	TRUE	-0.0324578	-0.285773	0.775052	0.856913	3387.28	2649.24	3447.44	3070.49	3200.96	3431.79
ENSMUSG00000035107	Dcbld2	TRUE	0.214329	5.09089	3.56388e-07	2.20699e-06	3491.33	3520.98	3690.44	3068.34	3055.85	3105.24
ENSMUSG00000017421	Zfp207	TRUE	0.0376318	0.904939	0.365498	0.508809	3117.36	3218.31	3013.89	3068.34	2960.96	3075
ENSMUSG00000030002	Dusp11	TRUE	-0.161292	-4.08712	4.36755e-05	0.00019819	2749.28	2738.79	2752.54	3067.26	3071.66	3077.02
ENSMUSG00000028962	Slc4a2	TRUE	0.111045	2.50978	0.0120807	0.0316702	3083.99	3313.53	3236.79	3066.18	2960.96	2892.58
ENSMUSG00000028790	Khdrbs1	TRUE	-0.138939	-3.18769	0.00143416	0.0048454	2869.03	2792.07	2936.1	3066.18	3136.78	3267.51
ENSMUSG00000021943	Gdf10	TRUE	1.52046	31.4713	2.14709e-217	1.34292e-214	8291.04	8412.49	8525.08	3065.11	2858.63	2873.43
ENSMUSG00000048285	Frmd6	TRUE	0.168264	3.26436	0.00109712	0.00380606	3236.13	3672.88	3698.31	3065.11	3203.75	3168.74
ENSMUSG00000002546	Golga2	TRUE	-0.0607928	-1.46424	0.143128	0.246752	2922.03	2963.25	2967.56	3065.11	3026.08	3143.54
ENSMUSG00000045954	Sdpr	TRUE	-0.111309	-2.02086	0.0432947	0.0944344	3167.42	2993.85	3025.25	3065.11	3345.15	3511.41
ENSMUSG00000029152	Ociad1	TRUE	-0.11864	-2.92011	0.00349912	0.0107003	2926.94	2933.77	2804.11	3056.5	3190.73	3152.61
ENSMUSG00000021585	Cast	TRUE	0.0347306	0.786888	0.431347	0.573653	3362.74	3108.35	3231.54	3056.5	3109.8	3308.83
ENSMUSG00000059890	Ube4a	TRUE	-0.0596194	-1.25018	0.211234	0.336249	3146.81	2847.62	2933.47	3055.43	3033.52	3219.13
ENSMUSG00000048537	Phldb1	TRUE	0.667826	15.9635	2.29633e-57	1.67331e-55	4639.72	5009.4	5123.96	3053.27	3102.36	3143.54
ENSMUSG00000002028	Mll1	TRUE	-0.319064	-2.68276	0.00730181	0.0205074	2697.26	2332.96	3076.83	3052.2	3356.31	3708.95
ENSMUSG00000024286	Ccny	TRUE	-0.219336	-5.23849	1.61895e-07	1.05615e-06	2681.56	2518.87	2606.56	3051.12	3026.08	3016.55
ENSMUSG00000039202	Abhd2	TRUE	-0.0993351	-2.3432	0.0191193	0.0469108	2812.1	2797.74	3015.64	3044.67	3058.64	3144.55
ENSMUSG00000034354	Mtmr3	TRUE	-0.319065	-7.51177	5.83324e-14	7.33357e-13	2371.39	2369.24	2383.67	3044.67	2851.19	2996.39
ENSMUSG00000020032	Nuak1	TRUE	-0.143669	-2.80911	0.00496788	0.014625	2650.15	2561.95	2828.58	3043.59	2947.94	2899.63
ENSMUSG00000032932	Hspa13	TRUE	-0.173206	-4.01384	5.97377e-05	0.000264754	2554.94	2789.8	2735.05	3043.59	3002.82	3061.9
ENSMUSG00000028111	Ctsk	TRUE	1.05453	25.1296	2.36224e-139	6.5666e-137	6523.29	6675.8	6600.32	3042.52	3229.8	3256.42
ENSMUSG00000050029	Rap2c	TRUE	-0.333219	-7.56518	3.87342e-14	4.95686e-13	2423.41	2480.33	2603.06	3039.29	3227.94	3191.92
ENSMUSG00000057530	Ece1	TRUE	0.207226	4.5742	4.78043e-06	2.50993e-05	3470.71	3811.18	3721.04	3037.14	3199.1	3289.68
ENSMUSG00000024835	Coro1b	TRUE	0.0420865	0.974471	0.329823	0.47136	3046.69	3243.25	3045.36	3037.14	2960.03	3064.93
ENSMUSG00000030275	Etnk1	TRUE	-0.119166	-2.86674	0.00414717	0.0124781	2857.25	2801.14	2887.15	3034.98	3075.38	3173.77
ENSMUSG00000097684	RP23-59P17.1	FALSE	0.587883	2.48569	0.01293	0.0335219	61.8368	69.15	64.6833	41.9583	45.5819	42.3304
ENSMUSG00000036241	Ube2r2	TRUE	-0.0598223	-1.30897	0.190544	0.309752	2923.02	3014.26	3059.34	3034.98	3208.41	3132.45
ENSMUSG00000032867	Fbxw8	TRUE	0.23069	5.78305	7.33584e-09	5.62115e-08	3527.64	3502.84	3687.82	3033.91	3050.26	3054.85
ENSMUSG00000022336	Eif3e	TRUE	-0.187875	-4.19039	2.78477e-05	0.000130306	2773.82	2625.43	2673.87	3030.68	3070.73	3096.17
ENSMUSG00000027312	Atrn	TRUE	-0.349525	-5.9676	2.40773e-09	1.96426e-08	2518.62	2269.48	2592.58	3030.68	3120.96	3260.45
ENSMUSG00000020142	Slc1a4	TRUE	-1.61422	-32.0346	3.60029e-225	2.57352e-222	937.368	1074.66	976.368	3030.68	3011.19	3088.11
ENSMUSG00000040351	Ankib1	TRUE	-0.269075	-6.40711	1.48302e-10	1.37248e-09	2564.76	2430.45	2535.76	3029.61	3039.1	3011.51
ENSMUSG00000030516	Tjp1	TRUE	-0.136532	-3.24367	0.00117999	0.00405606	2843.51	2763.73	2914.24	3027.45	3168.41	3174.78
ENSMUSG00000043535	Setx	TRUE	-0.157632	-2.57104	0.0101395	0.0272181	2817.99	2549.48	3020.01	3026.38	3180.5	3156.64
ENSMUSG00000041870	Ankrd13a	TRUE	-0.138188	-2.90995	0.00361488	0.0110179	2610.89	2800.01	2839.07	3024.23	2922.82	3134.47
ENSMUSG00000001783	D10Wsu52e	TRUE	-0.148563	-3.49054	0.000482039	0.00180401	2628.56	2781.87	2869.66	3024.23	3085.61	3069.96
ENSMUSG00000010461	Eya4	TRUE	0.0690572	1.45509	0.145644	0.250029	3244.96	2906.57	3132.77	3023.15	2904.22	2930.88
ENSMUSG00000031540	Kat6a	TRUE	-0.086325	-1.79132	0.0732421	0.145428	2901.42	2856.69	3115.29	3012.39	3134.92	3278.59
ENSMUSG00000030759	Far1	TRUE	0.0446325	1.09483	0.273593	0.410115	3136.01	3055.07	3182.59	3009.16	3057.71	3024.61
ENSMUSG00000024236	Svil	TRUE	0.24499	4.526	6.01096e-06	3.11677e-05	3659.17	3408.75	3842.54	3003.78	2999.1	3210.06
ENSMUSG00000041313	Slc7a1	TRUE	-1.17959	-21.4584	3.81085e-102	5.29673e-100	1226.92	1334.25	1443.14	3001.63	3109.8	2966.15
ENSMUSG00000007880	Arid1a	TRUE	-0.162087	-2.70725	0.0067844	0.0192406	2726.71	2500.73	2968.44	2998.41	3072.59	3108.26
ENSMUSG00000038619	Ensa	TRUE	-0.20794	-4.4952	6.95034e-06	3.56202e-05	2602.05	2771.67	2707.08	2997.33	3185.15	3145.55
ENSMUSG00000020716	Nf1	TRUE	-0.280318	-3.46868	0.00052302	0.00194237	2578.5	2220.73	2946.59	2997.33	3098.64	3319.92
ENSMUSG00000028161	Ppp3ca	TRUE	-0.068586	-1.57893	0.114353	0.207184	2935.78	3006.32	2874.04	2997.33	3087.47	3154.63
ENSMUSG00000039536	Stau1	TRUE	-0.166123	-4.0422	5.29517e-05	0.000236494	2711.99	2751.26	2644.15	2995.18	2986.08	3111.29
ENSMUSG00000032612	Usp4	TRUE	-0.0757613	-1.81827	0.0690235	0.138518	2751.25	2898.63	2860.05	2994.1	2929.33	3044.77
ENSMUSG00000093098	Gm22641	FALSE	0.575417	2.52462	0.0115824	0.0305613	89.3198	137.166	94.4026	79.6132	76.2799	58.4563
ENSMUSG00000032194	Kank2	TRUE	0.479225	10.6369	2.0069e-26	5.48737e-25	4367.84	3886	4287.45	2988.72	2970.26	3044.77
ENSMUSG00000026211	Obsl1	TRUE	0.333245	7.69602	1.40371e-14	1.87465e-13	3530.59	3866.73	3649.36	2988.72	2899.57	2876.45
ENSMUSG00000026469	Xpr1	TRUE	-0.373277	-7.41258	1.2387e-13	1.52786e-12	2216.31	2143.65	2273.53	2988.72	2792.59	2819.01
ENSMUSG00000023456	Tpi1	TRUE	-0.314159	-7.01728	2.26224e-12	2.50432e-11	2451.88	2403.24	2374.05	2987.65	2944.22	3055.85
ENSMUSG00000039671	Zmynd8	TRUE	-0.590513	-10.7285	7.47974e-27	2.10259e-25	2158.4	1956.6	2112.7	2985.49	3091.2	3306.81
ENSMUSG00000028478	Clta	TRUE	-0.0795517	-1.82498	0.0680048	0.136747	2733.58	2959.84	2900.26	2984.42	3056.78	3035.7
ENSMUSG00000028698	Pik3r3	TRUE	0.430022	7.21551	5.37321e-13	6.3112e-12	4600.46	3866.73	4082.04	2983.34	3097.71	3235.25
ENSMUSG00000037643	Prkci	TRUE	-0.268781	-6.11747	9.50732e-10	8.09497e-09	2542.18	2382.84	2568.97	2983.34	3021.43	3031.67
ENSMUSG00000062980	Cped1	TRUE	0.0997717	2.03301	0.0420513	0.092128	3194.9	3065.27	3345.17	2981.19	2914.45	3075
ENSMUSG00000009073	Nf2	TRUE	0.061469	1.38658	0.165569	0.277569	3064.36	3153.69	3152.87	2981.19	2940.5	3058.88
ENSMUSG00000044477	Zfand3	TRUE	-0.184808	-4.35754	1.31531e-05	6.48485e-05	2557.88	2605.03	2727.19	2971.51	3021.43	2979.26
ENSMUSG00000030890	Ilk	TRUE	0.437799	8.54484	1.28711e-17	2.12083e-16	3686.65	4282.76	4044.45	2965.05	2979.57	2920.8
ENSMUSG00000024640	Psat1	TRUE	-1.42537	-24.5506	4.26095e-133	1.01526e-130	1114.04	1147.21	1114.48	2960.75	3192.59	2906.69
ENSMUSG00000036565	Ttyh3	TRUE	0.242452	4.29086	1.77982e-05	8.59895e-05	3720.02	3196.77	3633.63	2958.6	2978.64	2987.32
ENSMUSG00000021987	Mtmr6	TRUE	0.0347862	0.729155	0.465907	0.606407	2871.98	2931.5	3093.43	2958.6	2818.63	2913.74
ENSMUSG00000001467	Cyp51	TRUE	-0.06296	-0.988693	0.322814	0.464331	2494.08	3080.01	2976.3	2953.22	2995.38	2980.26
ENSMUSG00000032481	Smarcc1	TRUE	-0.0696982	-1.45346	0.146096	0.250576	3012.34	2864.62	3007.77	2951.07	3210.27	3163.7
ENSMUSG00000063015	Ccni	TRUE	-0.285739	-6.89332	5.45052e-12	5.82333e-11	2352.74	2337.5	2428.24	2948.92	2856.77	2878.47
ENSMUSG00000024383	Map3k2	TRUE	-0.292253	-4.88962	1.01031e-06	5.87821e-06	2369.43	2106.24	2518.28	2942.46	2881.89	2751.48
ENSMUSG00000023883	Phf10	TRUE	-0.473935	-10.7554	5.5861e-27	1.58213e-25	2101.47	2088.1	2027.03	2940.31	2854.91	2837.15
ENSMUSG00000002319	Ipo4	TRUE	0.0960113	2.15281	0.0313335	0.0718417	3022.15	3246.65	3260.39	2940.31	2878.17	3098.18
ENSMUSG00000040463	Mybbp1a	TRUE	-0.20063	-4.03862	5.37662e-05	0.000239704	2484.27	2760.33	2670.37	2939.23	3017.71	3134.47
ENSMUSG00000090086	AI480526	FALSE	0.560633	3.03611	0.00239654	0.00766719	255.2	225.588	152.967	149.544	146.978	132.031
ENSMUSG00000022365	Derl1	TRUE	-0.431888	-10.7258	7.7009e-27	2.15668e-25	2140.73	2204.86	2184.37	2937.08	2961.89	2907.7
ENSMUSG00000024687	Osbp	TRUE	-0.094371	-2.0994	0.0357818	0.0804119	2684.5	2599.36	2829.46	2932.78	2779.56	2960.11
ENSMUSG00000043542	Zc2hc1a	TRUE	-0.102851	-2.34381	0.0190881	0.0468419	2687.45	2695.71	2820.72	2929.55	2969.33	2914.75
ENSMUSG00000026393	Nek7	TRUE	-0.185826	-4.21229	2.52796e-05	0.000118957	2594.2	2574.42	2552.37	2928.47	2867.01	2987.32
ENSMUSG00000032193	Ldlr	TRUE	-0.195864	-2.76714	0.005655	0.0163843	2075.95	2551.75	2636.28	2928.47	2748.87	2644.64
ENSMUSG00000085148	Mir22hg	FALSE	0.558602	7.16083	8.01924e-13	9.26351e-12	680.205	741.378	670.433	492.741	475.354	450.517
ENSMUSG00000005506	Celf1	TRUE	-0.21509	-5.33956	9.31732e-08	6.28595e-07	2446.97	2543.81	2566.35	2924.17	2922.82	2925.84
ENSMUSG00000057561	Eif1a	TRUE	-0.0433336	-0.681928	0.495285	0.633497	2513.72	3068.67	3096.06	2924.17	3038.17	2979.26
ENSMUSG00000042804	Gpr153	TRUE	0.298957	7.04372	1.87174e-12	2.09677e-11	3576.72	3426.89	3610.9	2923.1	2866.08	2844.2
ENSMUSG00000028580	Pum1	TRUE	-0.226646	-4.75191	2.01502e-06	1.12078e-05	2556.9	2338.63	2547.12	2923.1	2871.66	2922.82
ENSMUSG00000059981	Taok2	TRUE	0.058138	1.49111	0.135933	0.237322	3031.97	2988.18	3017.39	2923.1	2894.91	2864.36
ENSMUSG00000050578	Mmp13	TRUE	1.56884	13.8358	1.55063e-43	7.55729e-42	7458.7	10517.6	9081.88	2920.94	3128.41	3069.96
ENSMUSG00000075470	Alg10b	TRUE	-0.28209	-5.5121	3.54577e-08	2.52973e-07	2530.4	2195.79	2478.07	2916.64	2968.4	2884.52
ENSMUSG00000035199	Arl6ip5	TRUE	0.139029	2.93578	0.00332712	0.0102343	2998.59	3326	3146.75	2910.19	2898.64	2787.76
ENSMUSG00000039852	Rere	TRUE	-0.0706091	-1.25509	0.209444	0.334003	2986.82	2669.64	2983.3	2910.19	3040.03	3128.42
ENSMUSG00000038244	Mical2	TRUE	0.409251	5.42946	5.65256e-08	3.91738e-07	3322.5	4508.35	4080.29	2908.03	3005.61	3051.82
ENSMUSG00000031365	Zfp275	TRUE	-0.19026	-4.44254	8.89026e-06	4.48426e-05	2476.42	2454.26	2568.97	2908.03	2759.1	2897.62
ENSMUSG00000040842	Szrd1	TRUE	0.0288687	0.663429	0.507056	0.644362	2847.44	2942.84	3028.75	2908.03	2932.12	2805.9
ENSMUSG00000030782	Tgfb1i1	TRUE	0.471285	9.55379	1.25035e-21	2.62504e-20	3667.02	4164.87	3964.04	2906.96	2815.84	2783.73
ENSMUSG00000039515	Ppp2r4	TRUE	0.179946	4.50289	6.70356e-06	3.45205e-05	3167.42	3345.27	3192.21	2902.65	2833.52	2827.07
ENSMUSG00000015653	Steap2	TRUE	-0.191527	-4.55937	5.13081e-06	2.68264e-05	2490.16	2472.39	2662.5	2900.5	2932.12	2882.5
ENSMUSG00000000149	Gna12	TRUE	-0.189329	-4.01013	6.06862e-05	0.000268562	2462.68	2586.89	2547.12	2899.43	2764.68	2998.41
ENSMUSG00000019505	Ubb	TRUE	-0.0438167	-1.01356	0.310794	0.45176	2844.49	2962.11	2871.41	2890.82	2987.94	3061.9
ENSMUSG00000039585	Myo9a	TRUE	-0.0366383	-0.580759	0.561403	0.691152	2911.24	2484.86	2900.26	2889.74	2745.15	2883.51
ENSMUSG00000022451	Twf1	TRUE	-0.0161028	-0.397296	0.691149	0.794094	2800.32	2947.38	2836.45	2888.67	2884.68	2902.66
ENSMUSG00000037892	Pcdh18	TRUE	-0.11953	-1.92305	0.0544733	0.114076	2904.37	2442.92	2844.32	2887.59	2960.03	3058.88
ENSMUSG00000035621	Midn	TRUE	0.236868	3.88079	0.000104116	0.000441369	3115.4	3757.9	3752.5	2885.44	3038.17	3091.13
ENSMUSG00000097572	AC121264.1	FALSE	0.551088	2.61719	0.00886577	0.0242544	111.895	97.4901	89.158	64.5512	79.0706	59.4642
ENSMUSG00000027519	Rab22a	TRUE	-0.159033	-3.91718	8.95891e-05	0.000384016	2546.11	2612.96	2688.73	2885.44	2950.73	2927.86
ENSMUSG00000028691	Prdx1	TRUE	-0.00522045	-0.100907	0.919624	0.953085	2833.7	3101.55	2846.06	2885.44	2968.4	2952.04
ENSMUSG00000038668	Lpar1	TRUE	0.30685	7.27046	3.58254e-13	4.27484e-12	3524.7	3686.49	3783.97	2884.36	3010.26	2993.37
ENSMUSG00000029249	Rest	TRUE	-0.0718231	-1.53854	0.123916	0.220795	2803.27	2888.43	3030.5	2882.21	3093.99	3191.92
ENSMUSG00000006299	Aamp	TRUE	-0.100457	-2.37796	0.0174086	0.0432897	2591.26	2744.46	2750.79	2880.06	2968.4	2819.01
ENSMUSG00000020496	Rnf187	TRUE	-0.262436	-6.36476	1.956e-10	1.79143e-09	2345.87	2428.18	2322.48	2880.06	2796.31	2832.11
ENSMUSG00000022752	Tomm70a	TRUE	-0.208774	-4.75374	1.99689e-06	1.11143e-05	2431.27	2634.5	2581.21	2878.99	2975.85	2978.25
ENSMUSG00000020362	Cnot6	TRUE	-0.00252214	-0.0541134	0.956845	0.974954	2921.05	2726.32	2870.54	2877.91	2809.33	2851.26
ENSMUSG00000097252	AC105155.1	FALSE	0.547358	2.6648	0.00770344	0.0214658	71.6522	90.6885	91.7803	57.0203	65.117	51.4012
ENSMUSG00000018417	Myo1b	TRUE	0.192925	4.77896	1.76204e-06	9.87674e-06	3302.87	3332.8	3400.24	2876.83	2976.78	2925.84
ENSMUSG00000041570	Camsap2	TRUE	-0.238381	-4.67476	2.94294e-06	1.59712e-05	2463.66	2293.28	2598.69	2876.83	2887.47	2922.82
ENSMUSG00000022175	Lrp10	TRUE	0.140246	3.18098	0.0014678	0.00495016	3059.45	3169.56	3251.65	2875.76	2941.43	2785.75
ENSMUSG00000024002	Brd4	TRUE	-0.195493	-4.15956	3.18865e-05	0.000147822	2662.91	2540.41	2739.42	2872.53	3047.47	3179.82
ENSMUSG00000023186	Vwa5a	TRUE	0.116008	2.6667	0.00765995	0.0213684	3154.66	2974.58	3062.84	2871.45	2805.61	2808.93
ENSMUSG00000030654	Arl6ip1	TRUE	-0.127024	-2.95036	0.00317401	0.0098136	2762.04	2508.67	2588.2	2871.45	2841.89	2873.43
ENSMUSG00000020346	Mgat1	TRUE	0.200823	4.56955	4.8877e-06	2.56267e-05	3147.79	3306.73	3346.92	2870.38	2943.29	2713.18
ENSMUSG00000037149	Ddx1	TRUE	-0.0881812	-2.12125	0.0339009	0.0768711	2782.66	2817.01	2659.88	2870.38	2994.45	2906.69
ENSMUSG00000089774	Slc5a3	TRUE	0.622764	4.31233	1.61543e-05	7.83241e-05	3812.29	4455.07	4804.92	2869.3	2953.52	2666.82
ENSMUSG00000028284	Map3k7	TRUE	-0.0772421	-1.96469	0.0494503	0.105365	2669.78	2683.24	2770.89	2868.23	2849.33	2857.3
ENSMUSG00000032525	Nktr	TRUE	-0.104638	-2.10916	0.0349306	0.0788723	2675.67	2639.03	2747.29	2867.15	2829.8	2975.22
ENSMUSG00000038025	Phf2	TRUE	-0.242823	-4.89023	1.00719e-06	5.86233e-06	2354.71	2429.32	2559.36	2866.08	2906.08	2920.8
ENSMUSG00000006301	Tmbim1	TRUE	0.0140715	0.319123	0.749634	0.839444	2807.19	2874.82	2874.04	2861.77	2908.87	2701.08
ENSMUSG00000053644	Aldh7a1	TRUE	0.210092	5.15553	2.52913e-07	1.60528e-06	3252.81	3305.59	3357.41	2857.47	2843.75	2872.42
ENSMUSG00000027593	Raly	TRUE	-0.187242	-4.15966	3.18727e-05	0.000147804	2575.55	2610.69	2598.69	2856.39	2907.01	3099.19
ENSMUSG00000037933	Bicd2	TRUE	-0.0996855	-2.18782	0.0286826	0.0664847	2711.99	2637.9	2904.63	2856.39	2974.92	3020.58
ENSMUSG00000047514	Tspyl1	TRUE	-0.12028	-2.89626	0.00377634	0.0114611	2674.69	2547.21	2652.89	2849.94	2888.4	2825.05
ENSMUSG00000033855	Ston1	TRUE	-0.0220865	-0.397045	0.691334	0.794185	2822.9	2716.12	2955.33	2848.86	2746.08	3036.7
ENSMUSG00000031483	Erlin2	TRUE	-0.0720234	-1.71896	0.085621	0.165123	2722.78	2814.74	2710.58	2846.71	2849.33	2970.19
ENSMUSG00000071646	Mta2	TRUE	0.124848	2.96398	0.0030369	0.00943436	2985.83	3201.3	3129.27	2845.63	2863.29	2832.11
ENSMUSG00000030660	Pik3c2a	TRUE	-0.0572797	-1.06014	0.28908	0.427576	2921.05	2609.56	2915.12	2844.56	2905.15	3044.77
ENSMUSG00000036591	Arhgap21	TRUE	0.0147704	0.261489	0.793715	0.869225	3154.66	2659.44	2979.8	2843.48	2839.1	3028.64
ENSMUSG00000028675	Pnrc2	TRUE	0.0530026	1.03104	0.302524	0.442783	3265.57	2851.02	2926.48	2842.41	2849.33	3027.63
ENSMUSG00000038371	Sbf2	TRUE	-0.104519	-2.13673	0.0326196	0.0743928	2626.59	2471.26	2791	2842.41	2735.84	2914.75
ENSMUSG00000005371	Fbxo11	TRUE	-0.213712	-4.22069	2.43551e-05	0.00011493	2505.86	2411.18	2541	2841.33	2844.68	2967.16
ENSMUSG00000001441	Npepps	TRUE	-0.152005	-3.41107	0.000647089	0.00235821	2589.29	2402.11	2423	2839.18	2724.68	2677.9
ENSMUSG00000064302	Clasp1	TRUE	-0.16092	-2.97159	0.00296264	0.00923233	2649.17	2437.25	2777.01	2837.03	2955.38	3006.47
ENSMUSG00000005469	Prkaca	TRUE	0.0552724	1.23278	0.217659	0.343924	2999.58	3063	2888.89	2837.03	2978.64	2791.79
ENSMUSG00000029578	Wipi2	TRUE	-0.300583	-6.49136	8.50641e-11	8.07651e-10	2185.88	2413.45	2329.47	2835.95	2900.5	2791.79
ENSMUSG00000052331	Ankrd44	TRUE	-0.381171	-5.62818	1.82125e-08	1.3408e-07	2212.38	1894.26	2161.64	2835.95	2623.28	2713.18
ENSMUSG00000029622	Arpc1b	TRUE	0.267684	4.70998	2.47736e-06	1.35771e-05	3144.84	3660.41	3485.9	2834.88	2909.8	2799.86
ENSMUSG00000030847	Bag3	TRUE	0.214596	4.46967	7.83391e-06	3.98826e-05	3262.63	3508.51	3547.96	2833.8	2938.64	3119.35
ENSMUSG00000062115	Rai1	TRUE	-0.218168	-4.94659	7.55233e-07	4.47564e-06	2425.38	2414.58	2541.88	2832.72	2878.17	2880.49
ENSMUSG00000021760	Gpx8	TRUE	0.457814	10.6434	1.87219e-26	5.13774e-25	4107.73	3975.56	3860.89	2831.65	2991.66	2868.39
ENSMUSG00000038095	Sbno1	TRUE	-0.31897	-7.5119	5.82745e-14	7.33242e-13	2256.55	2191.26	2278.77	2831.65	2781.42	2783.73
ENSMUSG00000043998	Mgat2	TRUE	0.131968	3.1965	0.00139104	0.00470822	3054.54	3159.36	3228.92	2828.42	2946.08	2842.19
ENSMUSG00000081534	Slc48a1	TRUE	0.209578	4.31464	1.59865e-05	7.75859e-05	3149.75	3246.65	3069.83	2826.27	2777.7	2579.13
ENSMUSG00000031818	Cox4i1	TRUE	-0.136272	-2.32582	0.0200282	0.0488693	2712.97	2685.51	2619.67	2826.27	3196.31	2784.74
ENSMUSG00000030104	Edem1	TRUE	-0.282692	-5.58544	2.33115e-08	1.69868e-07	2169.2	2219.6	2305.87	2826.27	2637.24	2685.97
ENSMUSG00000041408	Wapal	TRUE	-0.262704	-5.6733	1.40071e-08	1.04452e-07	2364.52	2406.65	2527.02	2823.04	2932.12	3003.45
ENSMUSG00000005615	Pcyt1a	TRUE	0.14574	3.40455	0.000662722	0.00241108	2928.91	3108.35	3141.51	2820.89	2658.63	2821.02
ENSMUSG00000027067	Ssrp1	TRUE	-0.0590704	-1.26208	0.20692	0.330821	2670.76	2868.02	2733.31	2819.81	2898.64	2893.59
ENSMUSG00000044627	Swi5	TRUE	0.0405397	0.832778	0.40497	0.548349	2880.81	2979.12	2839.07	2818.74	2849.33	2785.75
ENSMUSG00000021072	Tmx1	TRUE	-0.075722	-1.78266	0.0746421	0.147642	2666.84	2573.29	2685.23	2816.59	2845.61	2694.03
ENSMUSG00000022811	Zfp148	TRUE	-0.260559	-5.91789	3.26107e-09	2.5983e-08	2301.7	2258.14	2393.28	2815.51	2814.91	2705.12
ENSMUSG00000065954	Tacc1	TRUE	0.0539943	1.16973	0.242111	0.373801	2937.74	2830.61	3058.47	2815.51	2860.5	2832.11
ENSMUSG00000019731	Slc35e1	TRUE	-0.119851	-2.71002	0.00672797	0.0191045	2525.49	2619.76	2743.79	2814.43	2920.96	2839.16
ENSMUSG00000031558	Slit2	TRUE	0.251727	3.65522	0.000256957	0.00101692	3945.78	3363.41	3740.27	2805.83	3160.96	3314.88
ENSMUSG00000024074	Crim1	TRUE	-0.256277	-4.55588	5.21673e-06	2.72093e-05	2548.07	2263.81	2613.55	2800.45	2957.24	3119.35
ENSMUSG00000029505	Ep400	TRUE	-0.185752	-2.47793	0.0132148	0.0341542	2602.05	2271.75	2901.13	2798.3	2911.66	3141.52
ENSMUSG00000058793	Cds2	TRUE	-0.319239	-6.64804	2.97031e-11	2.96459e-10	2310.54	2084.7	2203.6	2798.3	2787.01	2653.72
ENSMUSG00000019777	Hdac2	TRUE	-0.0212206	-0.501449	0.616055	0.736861	2851.36	2728.59	2775.26	2796.14	2842.82	2841.18
ENSMUSG00000008575	Nfib	TRUE	-0.0601933	-0.986874	0.323705	0.465345	2849.4	2516.6	2791	2788.61	2862.36	2858.31
ENSMUSG00000029063	Nadk	TRUE	-0.257347	-6.002	1.94906e-09	1.60139e-08	2293.85	2390.77	2415.13	2787.54	2790.73	2908.71
ENSMUSG00000068882	Ssb	TRUE	-0.259601	-6.30343	2.91126e-10	2.61526e-09	2350.78	2407.78	2289.26	2787.54	2798.17	2845.21
ENSMUSG00000017843	Ppp2r5c	TRUE	-0.217232	-4.65691	3.20985e-06	1.7357e-05	2501.94	2493.93	2483.31	2786.46	2838.17	3068.96
ENSMUSG00000038416	Cdc16	TRUE	0.368412	9.00859	2.0873e-19	3.79328e-18	3595.37	3577.66	3516.5	2783.23	2811.19	2683.95
ENSMUSG00000021876	Rnase4	TRUE	0.851296	21.5671	3.65882e-103	5.28101e-101	5406.3	5125.03	5150.19	2778.93	2959.1	2951.04
ENSMUSG00000013662	Atad1	TRUE	-0.340116	-8.07576	6.70579e-16	9.84938e-15	2203.55	2097.17	2224.58	2777.86	2765.61	2724.27
ENSMUSG00000030180	Kdm5a	TRUE	-0.135388	-2.94641	0.00321491	0.00992984	2503.9	2363.57	2471.08	2776.78	2611.19	2679.92
ENSMUSG00000029108	Pcdh7	TRUE	0.13737	2.75745	0.00582549	0.0168263	3099.69	2934.91	3326.82	2772.48	2879.1	2866.38
ENSMUSG00000055024	Ep300	TRUE	-0.281913	-4.19633	2.71271e-05	0.000127172	2319.37	2056.36	2553.24	2771.4	2764.68	2898.63
ENSMUSG00000015522	Arnt	TRUE	-0.0772819	-1.75016	0.08009	0.156353	2683.52	2654.9	2664.25	2770.32	2796.31	2876.45
ENSMUSG00000024870	Rab1b	TRUE	0.119223	2.61626	0.00888985	0.0243114	2757.14	2959.84	3060.22	2768.17	2682.82	2633.56
ENSMUSG00000037552	Plekhg2	TRUE	0.321903	7.23669	4.59776e-13	5.43869e-12	3405.93	3530.05	3560.2	2767.1	2836.31	2792.8
ENSMUSG00000030298	Sec13	TRUE	-0.0710047	-1.60148	0.109272	0.199595	2738.49	2793.2	2770.89	2767.1	2995.38	2954.06
ENSMUSG00000021840	Mapk1ip1l	TRUE	-0.0557466	-1.29597	0.194986	0.315369	2600.09	2669.64	2821.59	2766.02	2810.26	2838.15
ENSMUSG00000022255	Mtdh	TRUE	-0.274019	-5.84317	5.12165e-09	4.00005e-08	2269.31	2320.49	2311.99	2763.87	2804.68	2775.67
ENSMUSG00000024122	Pdpk1	TRUE	-0.351132	-6.20966	5.30991e-10	4.65307e-09	2087.73	2013.28	2273.53	2757.41	2610.26	2773.65
ENSMUSG00000024070	Prkd3	TRUE	0.025732	0.521219	0.602214	0.725392	2762.04	2617.5	2822.46	2757.41	2578.63	2729.31
ENSMUSG00000067336	Bmpr2	TRUE	-0.4016	-5.19997	1.99326e-07	1.28195e-06	2276.18	1812.64	2395.9	2756.34	2787.94	3032.67
ENSMUSG00000056692	D17Wsu92e	TRUE	-0.0531254	-1.16036	0.245901	0.378277	2467.58	2574.42	2679.99	2754.19	2591.66	2671.86
ENSMUSG00000096956	AC137123.1	FALSE	0.510792	6.62208	3.5419e-11	3.50478e-10	837.251	804.86	770.955	551.913	596.285	543.241
ENSMUSG00000042410	Agps	TRUE	-0.117354	-2.66953	0.00759586	0.021233	2600.09	2447.45	2678.24	2752.03	2760.03	2877.46
ENSMUSG00000025571	Tnrc6c	TRUE	-0.0919362	-1.69848	0.0894179	0.170596	2664.87	2447.45	2797.11	2752.03	2807.47	2878.47
ENSMUSG00000054408	Spcs3	TRUE	-0.363261	-8.06358	7.40916e-16	1.08506e-14	2080.86	2088.1	2199.23	2750.96	2794.45	2650.69
ENSMUSG00000030232	Aebp2	TRUE	-0.296355	-6.93138	4.16755e-12	4.50389e-11	2275.2	2168.59	2258.67	2748.81	2801.89	2683.95
ENSMUSG00000009035	Tmem184b	TRUE	-0.0360624	-0.670177	0.502745	0.640365	2711	2773.93	2813.72	2747.73	2785.15	2976.23
ENSMUSG00000020184	Mdm2	TRUE	-0.133165	-2.80574	0.00502013	0.014747	2450.9	2682.11	2558.49	2746.66	2730.26	2954.06
ENSMUSG00000017615	Tnfaip1	TRUE	0.0688696	1.82391	0.0681657	0.136998	2882.77	2874.82	2877.53	2745.58	2733.98	2753.49
ENSMUSG00000019467	Arhgef25	TRUE	0.333107	7.06417	1.61575e-12	1.82224e-11	3614.02	3633.21	3399.37	2743.43	2929.33	2771.64
ENSMUSG00000050912	Tmem123	TRUE	0.273902	5.70383	1.17148e-08	8.80574e-08	3396.12	3363.41	3421.22	2743.43	2834.45	2842.19
ENSMUSG00000029030	Tprgl	TRUE	-0.144729	-3.2828	0.00102782	0.00358805	2600.09	2449.72	2515.65	2743.43	2874.45	2746.44
ENSMUSG00000051910	Sox6	TRUE	-0.335507	-4.93567	7.98757e-07	4.71496e-06	2202.57	1885.19	2400.27	2743.43	2682.82	2772.64
ENSMUSG00000031309	Rps6ka3	TRUE	-0.0807299	-1.70775	0.0876834	0.168143	2586.35	2503	2739.42	2743.43	2707.01	2837.15
ENSMUSG00000005125	Ndrg1	TRUE	0.086106	1.72194	0.0850806	0.164263	3059.45	2779.6	3011.27	2740.2	2706.08	2897.62
ENSMUSG00000022185	Acin1	TRUE	0.0295635	0.556081	0.578156	0.705439	2691.37	2804.54	2621.42	2739.12	2633.52	2577.12
ENSMUSG00000020432	Tcn2	TRUE	0.343511	7.70877	1.27034e-14	1.69956e-13	3390.23	3413.29	3471.04	2738.05	2588.86	2774.66
ENSMUSG00000034560	A230046K03Rik	TRUE	-0.337579	-6.88485	5.78467e-12	6.15842e-11	2139.75	2045.02	2277.9	2738.05	2640.03	2799.86
ENSMUSG00000022641	Bbx	TRUE	-0.240022	-5.27442	1.33173e-07	8.79097e-07	2327.22	2175.39	2289.26	2736.97	2627.93	2663.79
ENSMUSG00000026353	Ubxn4	TRUE	-0.0385227	-0.771499	0.440411	0.581495	2484.27	2734.26	2691.35	2736.97	2727.47	2657.75
ENSMUSG00000028854	Slc9a1	TRUE	0.236665	4.06462	4.81104e-05	0.000216742	2924.98	3551.59	3217.56	2733.75	2680.03	2808.93
ENSMUSG00000038708	Golga4	TRUE	-0.139356	-2.81451	0.00488514	0.0144324	2484.27	2366.97	2630.16	2733.75	2777.7	2736.36
ENSMUSG00000052915	Msl1	TRUE	-0.0422988	-1.03136	0.30237	0.442644	2582.42	2552.88	2614.43	2733.75	2678.17	2572.08
ENSMUSG00000068732	Tmem167b	TRUE	-0.0849343	-1.94603	0.051651	0.109252	2581.44	2420.25	2615.3	2732.67	2693.98	2660.77
ENSMUSG00000001521	Tulp3	TRUE	-0.223454	-4.89803	9.68046e-07	5.64324e-06	2464.64	2226.4	2408.14	2731.59	2765.61	2798.85
ENSMUSG00000019943	Atp2b1	TRUE	-0.20949	-5.0768	3.83835e-07	2.36234e-06	2273.24	2312.56	2419.5	2730.52	2668.87	2707.13
ENSMUSG00000016933	Plcg1	TRUE	0.0308641	0.761852	0.446148	0.587794	2686.47	2812.48	2748.16	2730.52	2637.24	2704.11
ENSMUSG00000032253	Phip	TRUE	-0.274417	-3.95302	7.7172e-05	0.000335	2408.69	2012.15	2307.62	2729.44	2679.1	2736.36
ENSMUSG00000021540	Smad5	TRUE	-0.000532397	-0.0121961	0.990269	0.994576	2805.23	2663.97	2791.87	2729.44	2743.28	2795.82
ENSMUSG00000018547	Pip4k2b	TRUE	0.0858705	1.89911	0.0575503	0.119453	2842.53	2985.92	2949.21	2727.29	2862.36	2676.9
ENSMUSG00000004530	Coro1c	TRUE	-0.347897	-6.30047	2.96754e-10	2.66262e-09	2005.28	2372.64	2249.05	2726.21	2823.29	2878.47
ENSMUSG00000037270	4932438A13Rik	TRUE	-0.291968	-3.50606	0.000454784	0.00171269	2439.12	1926	2589.08	2720.83	2829.8	2972.2
ENSMUSG00000062234	Gak	TRUE	-0.250418	-5.71805	1.07754e-08	8.11589e-08	2356.67	2363.57	2370.55	2719.76	2747.94	2967.16
ENSMUSG00000042035	Igsf3	TRUE	0.241616	3.91817	8.92223e-05	0.000382771	3249.87	2854.42	3488.53	2718.68	2720.03	2682.94
ENSMUSG00000027665	Pik3ca	TRUE	-0.320098	-7.64102	2.15516e-14	2.82049e-13	2206.49	2207.13	2230.7	2717.61	2815.84	2760.55
ENSMUSG00000005802	Slc30a4	TRUE	-0.243244	-5.46761	4.56137e-08	3.19658e-07	2132.88	2261.54	2346.95	2715.46	2686.54	2581.15
ENSMUSG00000051495	Irf2bp2	TRUE	0.188521	2.66185	0.00777117	0.0216111	2605	3418.96	3212.31	2710.08	2747.94	2643.64
ENSMUSG00000002015	Bcap31	TRUE	-0.210446	-4.6051	4.12273e-06	2.18679e-05	2431.27	2488.26	2312.86	2710.08	2762.82	2887.54
ENSMUSG00000013160	Atp6v0d1	TRUE	-0.111124	-2.66959	0.00759434	0.0212327	2521.57	2532.48	2556.74	2707.92	2733.05	2779.7
ENSMUSG00000026112	Coa5	TRUE	-0.0425358	-0.996601	0.318958	0.459843	2659.96	2634.5	2709.7	2707.92	2664.21	2875.45
ENSMUSG00000034761	Map4k5	TRUE	-0.0433664	-1.04005	0.298316	0.438163	2619.72	2648.1	2775.26	2705.77	2787.94	2797.84
ENSMUSG00000041779	Tram2	TRUE	-0.199887	-4.20348	2.62846e-05	0.000123454	2209.44	2487.13	2420.38	2702.55	2736.77	2731.32
ENSMUSG00000034252	Senp6	TRUE	-0.114625	-2.729	0.00635261	0.0181532	2489.18	2437.25	2562.86	2696.09	2680.96	2737.37
ENSMUSG00000053907	Mat2a	TRUE	0.032096	0.608973	0.542543	0.675355	2462.68	2800.01	2603.06	2695.01	2529.33	2465.24
ENSMUSG00000022710	Usp7	TRUE	-0.0507276	-1.2625	0.206768	0.330683	2553.96	2573.29	2592.58	2695.01	2669.8	2632.55
ENSMUSG00000072704	2700089E24Rik	TRUE	-0.29174	-6.60436	3.99232e-11	3.92718e-10	2278.15	2148.18	2150.28	2690.71	2700.49	2659.76
ENSMUSG00000018001	Cyth3	TRUE	0.565273	7.60132	2.93119e-14	3.79639e-13	3503.1	4642.12	4145.85	2687.48	2718.17	2897.62
ENSMUSG00000028226	Mmp16	TRUE	0.335035	5.857	4.71312e-09	3.69445e-08	3395.14	3107.21	3481.53	2687.48	2530.26	2704.11
ENSMUSG00000029178	Klf3	TRUE	-0.159701	-2.58593	0.00971161	0.0262574	2526.48	2123.24	2543.63	2684.26	2600.03	2761.56
ENSMUSG00000000631	Myo18a	TRUE	0.238766	4.63344	3.59647e-06	1.92809e-05	3081.04	3117.42	3406.36	2683.18	2637.24	2825.05
ENSMUSG00000045573	Penk	TRUE	1.54652	12.3048	8.53766e-35	3.15662e-33	7260.43	7004.55	7585.42	2681.03	2507.93	2291.89
ENSMUSG00000020611	Gna13	TRUE	-0.248883	-5.96165	2.49706e-09	2.03604e-08	2201.59	2255.88	2296.26	2675.65	2637.24	2715.2
ENSMUSG00000032714	Syde1	TRUE	-0.0802923	-1.38479	0.166117	0.27833	2252.63	2674.18	2692.22	2674.57	2668.87	2711.16
ENSMUSG00000029048	Rer1	TRUE	-0.109343	-2.40049	0.0163733	0.0410796	2393.97	2512.07	2433.49	2671.35	2655.84	2587.2
ENSMUSG00000015759	Cnih	TRUE	-0.389737	-9.21347	3.15762e-20	6.0381e-19	2046.5	1992.88	2055	2670.27	2622.35	2697.05
ENSMUSG00000033047	Eif3l	TRUE	-0.132544	-3.04391	0.00233527	0.00749996	2569.66	2549.48	2548.87	2668.12	2855.84	2878.47
ENSMUSG00000001542	Ell2	TRUE	-0.279486	-6.01907	1.75423e-09	1.45218e-08	2162.33	2102.84	2160.77	2668.12	2527.47	2609.37
ENSMUSG00000008090	Fgfrl1	TRUE	0.295524	6.33042	2.44499e-10	2.21362e-09	3425.56	3099.28	3408.98	2667.04	2743.28	2688.99
ENSMUSG00000024501	Dpysl3	TRUE	0.226933	5.09409	3.50429e-07	2.17278e-06	3220.42	3314.66	3376.64	2667.04	2867.94	2931.89
ENSMUSG00000041895	Wipi1	TRUE	0.242703	5.64801	1.62317e-08	1.20086e-07	3209.62	3084.54	3262.13	2665.97	2617.7	2798.85
ENSMUSG00000024304	Cdh2	TRUE	-0.085357	-1.7005	0.0890367	0.170049	2740.45	2439.52	2681.73	2664.89	2769.33	2912.74
ENSMUSG00000014077	Chp1	TRUE	0.0228125	0.539335	0.589656	0.714623	2710.02	2710.45	2824.21	2663.81	2720.96	2733.34
ENSMUSG00000063511	Snrnp70	TRUE	0.0169548	0.313087	0.754214	0.84275	2498.99	2906.57	2557.61	2659.51	2621.42	2581.15
ENSMUSG00000058301	Upf1	TRUE	0.0664015	1.70859	0.087527	0.167949	2754.19	2795.47	2815.47	2658.44	2648.4	2682.94
ENSMUSG00000025139	Tollip	TRUE	-0.102444	-2.23459	0.0254444	0.0601326	2419.49	2461.06	2603.94	2658.44	2598.17	2784.74
ENSMUSG00000025066	Sfr1	TRUE	0.0220697	0.479683	0.631453	0.749209	2743.4	2839.68	2800.61	2656.28	2808.4	2787.76
ENSMUSG00000048264	Dip2c	TRUE	-0.32377	-5.27859	1.30183e-07	8.60489e-07	2097.54	1880.65	2255.17	2655.21	2562.82	2595.26
ENSMUSG00000026456	Cyb5r1	TRUE	-1.77362	-33.2333	3.56038e-242	3.14382e-239	725.356	818.463	803.296	2653.06	2746.08	2619.45
ENSMUSG00000004798	Ulk2	TRUE	-0.170743	-3.54644	0.00039048	0.00148882	2360.6	2199.2	2311.12	2643.37	2561.89	2534.79
ENSMUSG00000070867	Trabd2b	TRUE	-0.21683	-4.7386	2.15197e-06	1.19024e-05	2236.92	2356.77	2398.53	2642.3	2780.49	2702.09
ENSMUSG00000046574	Prr12	TRUE	-0.209208	-3.99962	6.34448e-05	0.000279451	2430.28	2196.93	2480.69	2641.22	2737.7	2846.22
ENSMUSG00000055319	Sec23ip	TRUE	0.0270181	0.61721	0.537096	0.670912	2604.02	2690.05	2826.83	2640.15	2619.56	2715.2
ENSMUSG00000028879	Stx12	TRUE	-0.170857	-3.63635	0.000276532	0.00108751	2305.63	2301.22	2295.38	2639.07	2622.35	2508.58
ENSMUSG00000033499	Larp4b	TRUE	-0.368889	-8.75374	2.06398e-18	3.55303e-17	2024.91	2049.56	2093.47	2639.07	2701.42	2625.49
ENSMUSG00000006673	Qrich1	TRUE	0.00709619	0.174173	0.861729	0.914487	2663.89	2682.11	2642.4	2635.84	2573.98	2739.38
ENSMUSG00000022440	C1qtnf6	TRUE	0.899783	21.6739	3.61984e-104	5.3272e-102	5031.36	4682.93	4841.63	2634.77	2589.79	2580.14
ENSMUSG00000027472	Pdrg1	TRUE	0.11459	2.33335	0.0196298	0.0480181	2761.06	2870.29	2693.1	2634.77	2617.7	2431.98
ENSMUSG00000041763	Tpp2	TRUE	-0.203744	-4.6514	3.2969e-06	1.77829e-05	2173.12	2188.99	2282.27	2633.69	2529.33	2495.48
ENSMUSG00000026600	Soat1	TRUE	-0.242542	-4.81442	1.47626e-06	8.36229e-06	2009.21	2264.94	2201.85	2632.61	2506.07	2521.68
ENSMUSG00000022620	Arsa	TRUE	0.066807	1.49472	0.134989	0.236195	2889.64	2800.01	2843.44	2632.61	2854.91	2656.74
ENSMUSG00000047731	Wbp1l	TRUE	0.0170873	0.38952	0.696891	0.797457	2722.78	2788.67	2745.54	2632.61	2718.17	2805.9
ENSMUSG00000036112	Metap2	TRUE	-0.179472	-3.78288	0.000155022	0.000639472	2284.04	2361.3	2235.94	2631.54	2586.07	2571.07
ENSMUSG00000018481	Appbp2	TRUE	-0.0673158	-1.36841	0.171183	0.284976	2578.5	2472.39	2617.05	2630.46	2571.19	2838.15
ENSMUSG00000007041	Clic1	TRUE	0.131682	2.91576	0.00354819	0.0108366	2828.79	3002.92	2856.55	2625.08	2706.08	2593.24
ENSMUSG00000037876	Jmjd1c	TRUE	-0.162421	-3.20184	0.00136552	0.00463122	2367.47	2185.59	2394.16	2625.08	2471.65	2687.98
ENSMUSG00000022307	Oxr1	TRUE	0.133513	2.39454	0.016641	0.0416874	3077.12	2584.62	2978.05	2622.93	2578.63	2682.94
ENSMUSG00000020777	Acox1	TRUE	0.00896636	0.210822	0.833026	0.89515	2598.13	2677.58	2528.77	2622.93	2513.51	2616.42
ENSMUSG00000030101	Sumf1	TRUE	-0.275162	-6.31149	2.76357e-10	2.49003e-09	2188.83	2128.91	2221.96	2621.86	2578.63	2719.23
ENSMUSG00000024420	Zfp521	TRUE	-0.211806	-4.06215	4.8623e-05	0.000218855	2413.6	2177.66	2337.34	2620.78	2649.33	2759.54
ENSMUSG00000004591	Pkn2	TRUE	-0.218565	-4.8508	1.22966e-06	7.04253e-06	2247.72	2101.71	2201.85	2620.78	2493.98	2515.64
ENSMUSG00000008140	Emc10	TRUE	-0.238957	-4.91187	9.02108e-07	5.28087e-06	2157.42	2294.42	2128.43	2619.7	2623.28	2515.64
ENSMUSG00000022285	Ywhaz	TRUE	-0.014619	-0.368834	0.712252	0.810154	2617.76	2660.57	2681.73	2619.7	2743.28	2675.89
ENSMUSG00000073664	Nbeal1	TRUE	-0.154532	-2.07542	0.0379479	0.0845387	2587.33	2105.11	2534.88	2619.7	2657.7	2773.65
ENSMUSG00000039116	Gpr126	TRUE	-0.269952	-4.97814	6.41971e-07	3.84235e-06	2281.09	2076.77	2350.45	2618.63	2701.42	2776.67
ENSMUSG00000027639	Samhd1	TRUE	0.425849	9.14789	5.80583e-20	1.09487e-18	3406.91	3426.89	3644.99	2615.4	2587.93	2601.31
ENSMUSG00000060961	Slc4a4	TRUE	-0.400788	-7.81734	5.39492e-15	7.45015e-14	1908.11	2006.48	2166.89	2615.4	2703.28	2715.2
ENSMUSG00000036646	Man1b1	TRUE	0.0585629	1.37571	0.16891	0.282	2687.45	2667.37	2707.96	2615.4	2557.24	2572.08
ENSMUSG00000026473	Glul	TRUE	-0.172288	-4.11591	3.85654e-05	0.000176388	2320.35	2264.94	2280.52	2614.33	2568.4	2555.95
ENSMUSG00000022507	1810013L24Rik	TRUE	-0.135804	-3.15027	0.00163117	0.0054364	2235.94	2303.49	2371.43	2613.25	2519.1	2465.24
ENSMUSG00000040681	Hmgn1	TRUE	-0.280654	-5.45551	4.88325e-08	3.40784e-07	2215.33	2220.73	2158.15	2613.25	2833.52	2557.97
ENSMUSG00000020823	Sec14l1	TRUE	-0.191761	-4.23355	2.3003e-05	0.00010902	2297.78	2241.14	2301.5	2612.17	2547.93	2656.74
ENSMUSG00000020866	Cacna1g	TRUE	0.985404	23.1945	5.1701e-119	9.82385e-117	5145.22	5147.7	5394.06	2610.02	2620.49	2695.04
ENSMUSG00000021559	Dapk1	TRUE	0.286583	4.59824	4.26074e-06	2.25442e-05	3465.81	2926.97	3096.93	2610.02	2507.93	2665.81
ENSMUSG00000024908	Ppp6r3	TRUE	-0.0829721	-1.87038	0.0614304	0.125888	2507.83	2515.47	2525.27	2610.02	2642.82	2742.41
ENSMUSG00000032418	Me1	TRUE	-0.197399	-4.87301	1.09913e-06	6.35069e-06	2316.43	2296.69	2291.01	2607.87	2642.82	2664.8
ENSMUSG00000067194	Eif1ax	TRUE	-0.0668454	-1.52544	0.12715	0.225103	2444.03	2442.92	2504.29	2606.79	2591.66	2545.87
ENSMUSG00000045658	Pid1	TRUE	-0.467104	-9.43591	3.87632e-21	7.88447e-20	1925.77	1763.89	1919.52	2603.57	2512.58	2647.67
ENSMUSG00000059119	Nap1l4	TRUE	9.72753e-05	0.0022966	0.998168	0.999166	2581.44	2615.23	2628.41	2601.42	2615.84	2607.35
ENSMUSG00000037003	Tenc1	TRUE	0.363619	4.85998	1.174e-06	6.75106e-06	2841.55	3819.12	3390.63	2598.19	2632.59	2577.12
ENSMUSG00000002981	Clptm1	TRUE	-0.166307	-4.09696	4.18617e-05	0.000190535	2315.45	2373.77	2347.83	2597.11	2631.66	2665.81
ENSMUSG00000041915	Ammecr1l	TRUE	-0.0225193	-0.551082	0.581577	0.708034	2499.97	2468.99	2513.03	2597.11	2487.47	2519.67
ENSMUSG00000037606	Osbpl5	TRUE	0.225126	5.34802	8.89195e-08	6.01519e-07	2899.46	3101.55	3083.82	2596.04	2533.98	2642.63
ENSMUSG00000070565	Rasal2	TRUE	-0.17548	-3.0987	0.0019437	0.00636079	2269.31	2194.66	2365.31	2596.04	2536.77	2585.18
ENSMUSG00000008475	Arpc5	TRUE	0.215476	4.79017	1.66643e-06	9.36883e-06	2887.68	3116.28	3107.42	2594.96	2635.38	2615.42
ENSMUSG00000027180	Fbxo3	TRUE	-0.106975	-2.50469	0.0122558	0.0320458	2476.42	2351.1	2479.82	2594.96	2656.77	2622.47
ENSMUSG00000075376	Rc3h2	TRUE	-0.182741	-3.6107	0.000305371	0.00119187	2232.01	2143.65	2356.57	2594.96	2548.86	2505.56
ENSMUSG00000031311	Nono	TRUE	-0.19613	-4.66002	3.16182e-06	1.71158e-05	2269.31	2354.5	2275.28	2594.96	2607.47	2697.05
ENSMUSG00000028402	Mpdz	TRUE	0.179187	3.16469	0.00155246	0.00519947	3045.71	2726.32	3155.49	2593.88	2640.03	2657.75
ENSMUSG00000031731	Ap1g1	TRUE	-0.182629	-3.83764	0.000124223	0.000520141	2179.99	2220.73	2271.78	2593.88	2396.3	2588.2
ENSMUSG00000024238	Zeb1	TRUE	0.31265	6.62041	3.58205e-11	3.53984e-10	3067.3	3180.9	3411.61	2592.81	2602.82	2586.19
ENSMUSG00000038914	Dido1	TRUE	-0.151251	-2.90876	0.0036286	0.0110462	2421.45	2208.26	2455.34	2590.66	2653.98	2630.53
ENSMUSG00000021144	Mta1	TRUE	-0.242116	-5.23139	1.68242e-07	1.09565e-06	2206.49	2378.31	2281.4	2590.66	2743.28	2779.7
ENSMUSG00000020700	Map3k3	TRUE	-0.445408	-9.40899	5.00905e-21	1.01199e-19	1867.86	1935.07	1937.88	2586.35	2537.7	2694.03
ENSMUSG00000037058	Paip2	TRUE	-0.0459109	-0.88981	0.373568	0.517023	2498.99	2458.79	2478.94	2585.28	2678.17	2412.83
ENSMUSG00000038664	Herc1	TRUE	-0.202328	-2.38606	0.0170298	0.0425136	2328.21	2050.69	2617.92	2578.82	2550.72	2927.86
ENSMUSG00000064215	Ifi27l1	TRUE	0.159874	1.85566	0.0635022	0.129339	2573.59	3039.2	2929.98	2578.82	2752.59	2313.06
ENSMUSG00000018412	Kansl1	TRUE	-0.247007	-4.94971	7.43241e-07	4.4098e-06	2142.69	2068.83	2195.73	2577.75	2453.98	2579.13
ENSMUSG00000026872	Zeb2	TRUE	0.45655	9.03144	1.69425e-19	3.0902e-18	3464.82	3237.58	3542.72	2576.67	2426.07	2470.28
ENSMUSG00000024487	Yipf5	TRUE	0.102596	2.40701	0.0160838	0.0404683	2646.22	2722.92	2737.68	2575.59	2505.14	2471.29
ENSMUSG00000020321	Mdh1	TRUE	-0.114541	-2.56961	0.0101812	0.0273057	2429.3	2318.22	2292.76	2575.59	2500.49	2546.88
ENSMUSG00000019961	Tmpo	TRUE	-0.165573	-3.09777	0.00194983	0.0063711	2565.74	2386.24	2356.57	2575.59	2791.66	2827.07
ENSMUSG00000024603	Dctn4	TRUE	-0.195712	-4.55524	5.23257e-06	2.72635e-05	2377.28	2243.41	2332.97	2575.59	2719.1	2670.85
ENSMUSG00000015709	Arnt2	TRUE	0.867604	18.2727	1.36537e-74	1.38484e-72	4417.9	4693.13	4789.18	2569.14	2541.42	2508.58
ENSMUSG00000041355	Ssr2	TRUE	0.176915	3.46933	0.00052176	0.00193817	2877.87	2875.96	2848.69	2564.84	2621.42	2421.91
ENSMUSG00000022808	Snx4	TRUE	-0.10118	-2.50813	0.0121372	0.0317849	2411.64	2395.31	2421.25	2564.84	2605.61	2583.16
ENSMUSG00000035726	Supt16	TRUE	-0.15991	-3.81528	0.000136029	0.000565476	2325.26	2334.09	2337.34	2563.76	2604.68	2647.67
ENSMUSG00000020844	Nxn	TRUE	-0.261758	-5.48938	4.03342e-08	2.85324e-07	2244.77	2335.23	2213.22	2562.68	2795.38	2777.68
ENSMUSG00000035168	Tanc1	TRUE	0.071639	1.50941	0.131195	0.230902	2737.51	2626.56	2921.24	2561.61	2653.98	2674.88
ENSMUSG00000026083	Eif5b	TRUE	-0.171122	-2.92995	0.0033902	0.0104006	2163.31	2535.88	2202.73	2559.46	2546.07	2656.74
ENSMUSG00000028657	Ppt1	TRUE	0.0230851	0.543586	0.586726	0.712108	2594.2	2515.47	2528.77	2557.31	2447.47	2515.64
ENSMUSG00000021395	Spin1	TRUE	0.107389	2.27854	0.0226946	0.0545225	2715.91	2585.75	2699.22	2553	2498.63	2379.58
ENSMUSG00000029090	Gpr125	TRUE	-0.172154	-3.79104	0.000150017	0.000620358	2285.02	2430.45	2352.2	2551.93	2691.19	2714.19
ENSMUSG00000020075	Ddx21	TRUE	-0.234847	-4.13903	3.48771e-05	0.000160743	1989.57	2383.97	2265.66	2550.85	2552.59	2705.12
ENSMUSG00000016664	Pacsin2	TRUE	-0.271918	-5.50869	3.61516e-08	2.57557e-07	2050.43	2260.41	2194.86	2550.85	2567.47	2733.34
ENSMUSG00000031652	N4bp1	TRUE	-0.405785	-8.10269	5.37585e-16	7.95044e-15	1936.57	1960	1986.83	2547.62	2533.05	2715.2
ENSMUSG00000022967	Ifnar1	TRUE	0.0426219	0.986602	0.323838	0.465447	2573.59	2710.45	2693.1	2547.62	2551.65	2644.64
ENSMUSG00000056870	Gulp1	TRUE	0.131136	1.96693	0.0491913	0.104943	2914.18	2445.19	2745.54	2546.55	2470.72	2388.65
ENSMUSG00000097589	Dleu2	FALSE	0.464513	3.45126	0.000557971	0.00206095	241.458	241.458	254.363	153.847	198.142	181.416
ENSMUSG00000020484	Xbp1	TRUE	-0.0682243	-1.46233	0.143652	0.247373	2303.67	2506.4	2417.76	2546.55	2496.77	2531.76
ENSMUSG00000028583	Pdpn	TRUE	0.649995	15.6059	6.63152e-55	4.54547e-53	4095.95	4192.07	4241.12	2543.32	2734.91	2703.1
ENSMUSG00000027423	Snx5	TRUE	-0.408131	-7.84999	4.16059e-15	5.78283e-14	1933.63	1862.51	1844.35	2542.24	2469.79	2473.31
ENSMUSG00000037351	Actr1b	TRUE	0.0202636	0.422583	0.6726	0.780171	2401.82	2606.16	2546.25	2542.24	2506.07	2398.72
ENSMUSG00000030753	Prkrir	TRUE	-0.190034	-4.52712	5.97927e-06	3.10248e-05	2230.05	2271.75	2300.63	2541.17	2558.17	2661.78
ENSMUSG00000081137	BC022960	FALSE	0.46336	2.36654	0.0179554	0.0444279	104.043	112.227	87.4098	75.3098	71.6287	72.5665
ENSMUSG00000042688	Mapk6	TRUE	-0.0498894	-1.12718	0.259666	0.39396	2364.52	2525.67	2540.13	2541.17	2527.47	2623.48
ENSMUSG00000026585	Kifap3	TRUE	0.227133	4.83756	1.31442e-06	7.50219e-06	3202.75	2905.43	3028.75	2534.71	2573.05	2701.08
ENSMUSG00000067276	Capn6	TRUE	0.35587	5.49827	3.83544e-08	2.72117e-07	3536.48	3179.76	3423.84	2532.56	2651.19	2741.4
ENSMUSG00000056493	Foxk1	TRUE	-0.143972	-2.83003	0.0046544	0.0138159	2196.68	2271.75	2491.18	2532.56	2586.07	2577.12
ENSMUSG00000050017	Pitpnb	TRUE	-0.141262	-3.44691	0.000567029	0.00208875	2276.18	2334.09	2340.84	2531.48	2560.03	2574.09
ENSMUSG00000030352	Tspan9	TRUE	-0.0740419	-1.65128	0.0986822	0.184221	2375.32	2464.46	2409.01	2531.48	2522.82	2574.09
ENSMUSG00000037513	Samd4b	TRUE	0.0294153	0.60598	0.544528	0.677136	2412.62	2639.03	2683.48	2528.26	2508.86	2542.85
ENSMUSG00000043962	Thrap3	TRUE	-0.110373	-2.4268	0.0152326	0.0386506	2194.72	2312.56	2398.53	2526.11	2491.19	2441.06
ENSMUSG00000029020	Mfn2	TRUE	-0.0157066	-0.368234	0.712699	0.81054	2450.9	2556.28	2582.09	2526.11	2544.21	2602.31
ENSMUSG00000054823	Whsc1l1	TRUE	-0.178946	-3.77228	0.000161763	0.000664177	2223.18	2174.26	2294.51	2523.95	2477.24	2580.14
ENSMUSG00000027109	Sp3	TRUE	0.0219838	0.484059	0.628344	0.746681	2618.74	2659.44	2682.61	2521.8	2605.61	2712.17
ENSMUSG00000027879	Sec22b	TRUE	0.0710337	1.65266	0.0984002	0.18386	2722.78	2720.65	2627.54	2520.73	2520.96	2638.6
ENSMUSG00000032594	Ip6k1	TRUE	0.063307	1.18511	0.235974	0.366456	2489.18	2382.84	2440.48	2515.35	2325.61	2161.88
ENSMUSG00000029238	Clock	TRUE	-0.310829	-6.47335	9.58566e-11	9.06682e-10	2014.11	1998.55	2207.97	2514.27	2581.42	2628.52
ENSMUSG00000006931	Leprel4	TRUE	0.277303	5.69644	1.22336e-08	9.17736e-08	2930.87	3050.53	2932.6	2508.89	2455.84	2388.65
ENSMUSG00000042082	Arsb	TRUE	0.177087	3.94105	8.11255e-05	0.000349835	2868.05	2710.45	2949.21	2507.82	2476.31	2566.03
ENSMUSG00000006736	Tspan31	TRUE	0.102958	2.46811	0.0135829	0.034961	2664.87	2789.8	2730.68	2507.82	2538.63	2572.08
ENSMUSG00000012422	Tmem167	TRUE	-0.121412	-2.49918	0.0124482	0.0324578	2326.24	2355.63	2268.28	2506.74	2666.07	2381.59
ENSMUSG00000029577	Ube3b	TRUE	-0.109018	-2.45163	0.0142211	0.0363915	2246.74	2261.54	2287.52	2505.66	2336.77	2491.45
ENSMUSG00000020132	Rab21	TRUE	-0.302478	-6.18337	6.27484e-10	5.44775e-09	1999.39	2083.57	2146.79	2505.66	2665.14	2511.61
ENSMUSG00000078622	Ccdc47	TRUE	-0.488851	-11.3551	6.99905e-30	2.21651e-28	1842.34	1792.23	1755.19	2502.44	2576.77	2480.36
ENSMUSG00000093077	Mir5105	FALSE	0.456583	2.42167	0.0154493	0.0391145	16282.7	24903.1	20597.3	17297.6	15443.9	12279.9
ENSMUSG00000029176	Anapc4	TRUE	-0.0169895	-0.389639	0.696804	0.797436	2498.99	2453.12	2456.22	2502.44	2483.75	2510.6
ENSMUSG00000041720	Pi4ka	TRUE	-0.259481	-4.52864	5.93656e-06	3.08245e-05	2111.29	2089.24	2200.98	2500.28	2447.47	2719.23
ENSMUSG00000025223	Ldb1	TRUE	-0.111441	-2.25572	0.0240879	0.0574216	2378.26	2274.01	2191.36	2499.21	2494.91	2396.71
ENSMUSG00000027035	Cers6	TRUE	-0.316462	-5.66821	1.44294e-08	1.07493e-07	2090.67	1845.51	2130.18	2498.13	2473.51	2593.24
ENSMUSG00000002129	Sf3a1	TRUE	-0.0592979	-1.2197	0.222578	0.350024	2195.7	2467.86	2451.85	2498.13	2422.35	2493.46
ENSMUSG00000027546	Atp9a	TRUE	-0.30613	-6.81774	9.24837e-12	9.68788e-11	2087.73	2016.68	1998.19	2497.06	2481.89	2566.03
ENSMUSG00000056515	Rab31	TRUE	0.051203	1.07868	0.280732	0.41795	2549.05	2566.48	2669.5	2493.83	2369.33	2655.73
ENSMUSG00000055302	Mrfap1	TRUE	-0.00154303	-0.030685	0.975521	0.986296	2344.89	2357.9	2399.4	2489.53	2410.26	2212.27
ENSMUSG00000046808	Atp10d	FALSE	0.454446	2.66868	0.00761497	0.0212785	115.821	156.438	146.849	112.965	107.908	84.6609
ENSMUSG00000029201	Ugdh	TRUE	-0.0488384	-1.07987	0.280201	0.417469	2470.53	2506.4	2550.62	2489.53	2654.91	2640.61
ENSMUSG00000030852	Tacc2	TRUE	-0.0603377	-0.943604	0.345372	0.48868	2580.46	2141.38	2416.01	2486.3	2342.35	2621.46
ENSMUSG00000024472	Dcp2	TRUE	-0.0649008	-1.13459	0.256547	0.390451	2308.57	2127.78	2428.24	2486.3	2360.02	2343.29
ENSMUSG00000037692	Ahdc1	TRUE	-0.0967136	-1.84531	0.0649928	0.13175	2315.45	2245.67	2527.02	2486.3	2464.21	2637.59
ENSMUSG00000002147	Stat6	TRUE	0.267201	6.67651	2.44702e-11	2.46857e-10	3004.48	2941.71	2950.08	2485.22	2400.03	2509.59
ENSMUSG00000028668	Tceb3	TRUE	-0.127974	-2.89334	0.00381168	0.0115567	2183.92	2137.98	2283.14	2484.15	2360.02	2382.6
ENSMUSG00000060373	Hnrnpc	TRUE	-0.208358	-4.61132	4.0013e-06	2.12765e-05	2148.58	2159.52	2161.64	2483.07	2555.38	2435.01
ENSMUSG00000025781	Atp5c1	TRUE	-0.0920907	-1.87628	0.0606169	0.124561	2412.62	2309.16	2245.56	2483.07	2548.86	2391.67
ENSMUSG00000005142	Man2b1	TRUE	-0.141094	-2.98182	0.0028654	0.00896843	2148.58	2149.32	2261.29	2480.92	2296.77	2463.23
ENSMUSG00000020705	Ddx42	TRUE	-0.107161	-2.23608	0.0253468	0.0599559	2346.85	2275.15	2497.3	2480.92	2588.86	2604.33
ENSMUSG00000003464	Pex19	TRUE	-0.0465596	-1.0312	0.302446	0.442712	2323.3	2229.8	2294.51	2479.84	2327.47	2270.73
ENSMUSG00000034463	Scara3	TRUE	0.939428	21.1901	1.17727e-99	1.5639e-97	4857.63	4730.54	4531.33	2476.62	2431.65	2453.15
ENSMUSG00000039159	Ube2h	TRUE	-0.167542	-3.16015	0.00157686	0.00526825	2333.11	2035.96	2269.16	2474.46	2531.19	2457.18
ENSMUSG00000030105	Arl8b	TRUE	-0.309013	-6.69755	2.11941e-11	2.1479e-10	2046.5	1918.06	1938.75	2474.46	2335.84	2507.57
ENSMUSG00000039703	Nploc4	TRUE	-0.0782528	-1.65601	0.0977202	0.182902	2168.21	2433.85	2409.01	2473.39	2456.77	2470.28
ENSMUSG00000020189	Osbpl8	TRUE	-0.377846	-7.37358	1.66105e-13	2.03544e-12	1791.3	1720.81	1883.68	2472.31	2215.84	2335.23
ENSMUSG00000021096	Ppm1a	TRUE	-0.189025	-4.27822	1.88391e-05	9.05807e-05	2163.31	2278.55	2199.23	2471.24	2494.91	2600.3
ENSMUSG00000031770	Herpud1	TRUE	-0.697977	-15.4377	9.13281e-54	6.06605e-52	1489.97	1509.96	1515.69	2471.24	2453.05	2401.75
ENSMUSG00000052707	Tnrc6a	TRUE	-0.029687	-0.629567	0.528978	0.663754	2612.85	2413.45	2579.46	2471.24	2643.75	2651.7
ENSMUSG00000032575	Manf	TRUE	-0.146857	-3.04424	0.00233266	0.00749477	2223.18	2246.81	2329.47	2470.16	2597.24	2461.21
ENSMUSG00000027363	Usp8	TRUE	-0.233716	-5.52123	3.36638e-08	2.41091e-07	2163.31	2193.53	2165.14	2470.16	2564.68	2630.53
ENSMUSG00000009090	Ap1b1	TRUE	-0.308644	-7.201	5.97724e-13	6.96617e-12	1958.17	1983.81	2012.17	2470.16	2436.3	2470.28
ENSMUSG00000029247	Paics	TRUE	0.0431631	1.01619	0.30954	0.450591	2556.9	2508.67	2465.83	2470.16	2393.51	2446.09
ENSMUSG00000061136	Prpf40a	TRUE	-0.179944	-3.58716	0.000334305	0.00129303	2177.05	2196.93	2404.64	2469.09	2532.12	2683.95
ENSMUSG00000028552	Eps15	TRUE	-0.322299	-6.75303	1.44792e-11	1.49586e-10	1960.13	1868.18	2042.77	2466.93	2380.49	2503.54
ENSMUSG00000026883	Dab2ip	TRUE	0.180842	4.24999	2.13781e-05	0.00010194	2815.05	2760.33	2849.56	2465.86	2435.37	2534.79
ENSMUSG00000028343	Erp44	TRUE	-0.0904819	-1.97142	0.0486757	0.104025	2433.23	2338.63	2402.02	2462.63	2560.03	2616.42
ENSMUSG00000031839	Hsbp1	TRUE	-0.0191046	-0.395456	0.692507	0.794863	2573.59	2566.48	2411.64	2459.4	2648.4	2536.8
ENSMUSG00000021318	Gli3	TRUE	-0.0387937	-0.600776	0.547989	0.680217	2361.58	2209.4	2671.24	2459.4	2414.91	2574.09
ENSMUSG00000040760	Appl1	TRUE	-0.0685654	-1.47772	0.139482	0.241913	2323.3	2310.29	2464.08	2459.4	2444.68	2544.87
ENSMUSG00000032745	Gpbp1	TRUE	-0.213454	-4.22342	2.40619e-05	0.000113762	2082.82	2131.18	2106.58	2458.33	2465.14	2403.76
ENSMUSG00000024754	Tmem2	TRUE	0.636394	12.0982	1.07918e-33	3.86623e-32	3654.26	3717.09	4158.96	2456.17	2444.68	2521.68
ENSMUSG00000038502	Ptov1	TRUE	0.0768897	1.65154	0.0986291	0.184167	2529.42	2549.48	2473.7	2456.17	2399.1	2303.99
ENSMUSG00000031988	Vps26b	TRUE	-0.104599	-2.00759	0.0446864	0.0970188	2137.79	2151.58	2143.29	2455.1	2255.84	2208.24
ENSMUSG00000033671	Cep350	TRUE	-0.225749	-2.88672	0.00389283	0.0117789	2246.74	1782.03	2282.27	2454.02	2333.05	2602.31
ENSMUSG00000062762	Ei24	TRUE	0.0945956	1.92966	0.0536491	0.112686	2839.59	2692.31	2666	2454.02	2714.45	2504.55
ENSMUSG00000034487	Kdelc2	TRUE	0.0870778	1.71165	0.0869618	0.167164	2769.9	2480.33	2635.41	2454.02	2476.31	2497.5
ENSMUSG00000048874	Phf3	TRUE	-0.322281	-5.325	1.00951e-07	6.77718e-07	2023.93	1867.05	2103.95	2452.95	2402.82	2647.67
ENSMUSG00000041084	Ostc	TRUE	-0.112976	-2.40513	0.0161665	0.0406219	2277.17	2320.49	2308.49	2451.87	2560.03	2454.16
ENSMUSG00000032423	Syncrip	TRUE	-0.134959	-3.05651	0.00223931	0.00722578	2244.77	2154.98	2298.88	2446.49	2501.42	2412.83
ENSMUSG00000031342	Gpm6b	TRUE	0.554528	8.90654	5.265e-19	9.40868e-18	3531.57	3416.69	3640.62	2445.42	2437.24	2329.18
ENSMUSG00000005936	Kctd20	TRUE	0.0725487	1.73696	0.0823945	0.159962	2538.25	2571.02	2579.46	2445.42	2447.47	2418.88
ENSMUSG00000046668	Cxxc5	TRUE	0.00160922	0.0257742	0.979437	0.988324	2100.49	2576.69	2393.28	2445.42	2331.19	2282.82
ENSMUSG00000039068	Zzz3	TRUE	-0.257853	-5.57718	2.44449e-08	1.77868e-07	2011.17	1973.61	2041.89	2444.34	2344.21	2422.91
ENSMUSG00000033585	Ndn	TRUE	-0.42886	-9.16613	4.90289e-20	9.26917e-19	1791.3	1916.93	1896.79	2444.34	2523.75	2574.09
ENSMUSG00000024270	Slc39a6	TRUE	-0.186007	-4.22292	2.41162e-05	0.000113982	2160.36	2221.87	2236.82	2438.96	2525.61	2564.01
ENSMUSG00000009079	Ewsr1	TRUE	0.311663	6.94266	3.84776e-12	4.17031e-11	3104.6	3040.33	2891.52	2436.81	2443.75	2396.71
ENSMUSG00000032796	Lama1	TRUE	-0.521093	-8.17613	2.93105e-16	4.40421e-15	1649.96	1658.47	1840.85	2436.81	2452.12	2506.57
ENSMUSG00000020173	Cobl	TRUE	-0.728204	-12.6407	1.25998e-36	4.96418e-35	1449.73	1410.21	1560.27	2434.66	2324.68	2573.09
ENSMUSG00000058672	Tubb2a	TRUE	0.0830689	1.62147	0.104918	0.193408	2455.8	2671.91	2832.08	2431.43	2521.89	2563.01
ENSMUSG00000041815	Poldip3	TRUE	-0.0418229	-0.875644	0.381224	0.524987	2336.06	2436.12	2486.81	2431.43	2486.54	2554.94
ENSMUSG00000004789	Dlst	TRUE	0.118129	2.5174	0.0118224	0.0310963	2590.28	2881.63	2678.24	2430.35	2514.45	2556.96
ENSMUSG00000022094	Slc39a14	TRUE	0.232214	3.25808	0.00112168	0.00388053	2481.32	3294.26	3052.35	2428.2	2543.28	2539.83
ENSMUSG00000020393	Kremen1	TRUE	0.598333	13.1042	3.11687e-39	1.34446e-37	3487.4	3780.58	3656.35	2427.13	2448.4	2337.24
ENSMUSG00000060591	Ifitm2	TRUE	0.466628	8.49311	2.01174e-17	3.27174e-16	3543.35	3602.6	3403.74	2427.13	2770.26	2429.97
ENSMUSG00000058799	Nap1l1	TRUE	-0.211049	-4.80846	1.52095e-06	8.59277e-06	2201.59	2178.79	2127.56	2424.98	2573.98	2528.74
ENSMUSG00000040423	Rc3h1	TRUE	-0.172296	-2.9979	0.00271844	0.008574	2148.58	1863.65	2180	2422.82	2272.58	2293.91
ENSMUSG00000039542	Ncam1	TRUE	-0.526954	-10.0177	1.27475e-23	3.00396e-22	1737.32	1755.96	1854.84	2422.82	2549.79	2736.36
ENSMUSG00000055485	Soga1	TRUE	0.0129386	0.206443	0.836445	0.897272	2488.2	2108.51	2610.06	2422.82	2297.7	2432.99
ENSMUSG00000016554	Eif3d	TRUE	-0.0466215	-0.888569	0.374235	0.517611	2236.92	2534.74	2482.44	2422.82	2548.86	2516.65
ENSMUSG00000036564	Ndrg4	TRUE	0.263626	6.35426	2.09426e-10	1.91222e-09	2888.66	2879.36	2936.1	2421.75	2488.4	2340.27
ENSMUSG00000036057	Ptpn23	TRUE	0.00968316	0.20725	0.835815	0.897027	2258.52	2433.85	2463.21	2421.75	2290.26	2398.72
ENSMUSG00000025351	Cd63	TRUE	0.286043	4.97746	6.44253e-07	3.85447e-06	2969.15	2974.58	2852.18	2420.67	2529.33	2260.65
ENSMUSG00000028980	H6pd	TRUE	0.157958	3.27347	0.00106236	0.00370087	2749.28	2590.29	2833.83	2420.67	2364.68	2547.89
ENSMUSG00000067851	Arfgef1	TRUE	-0.0489496	-0.925257	0.354832	0.498119	2391.02	2257.01	2449.22	2419.6	2419.56	2508.58
ENSMUSG00000053646	Plxnb1	TRUE	-0.0905198	-1.33351	0.182364	0.299307	2436.17	2068.83	2289.26	2419.6	2298.63	2521.68
ENSMUSG00000097649	AC122223.1	FALSE	0.428882	2.33873	0.0193495	0.0474289	106.006	98.6237	97.899	71.0064	84.6521	68.535
ENSMUSG00000028034	Fubp1	TRUE	-0.0648848	-1.48929	0.13641	0.237934	2300.72	2322.76	2236.82	2418.52	2371.19	2383.61
ENSMUSG00000015501	Hivep2	TRUE	0.124237	2.37889	0.017365	0.0432282	2566.72	2717.25	2890.64	2417.44	2452.12	2633.56
ENSMUSG00000034021	Pds5b	TRUE	-0.021564	-0.367368	0.713344	0.811016	2479.36	2113.04	2421.25	2416.37	2350.72	2360.43
ENSMUSG00000049421	Zfp260	TRUE	-0.0636749	-1.31201	0.189516	0.308516	2463.66	2229.8	2273.53	2415.29	2427	2441.06
ENSMUSG00000024735	Prpf19	TRUE	-0.110358	-2.28984	0.0220305	0.0530733	2113.25	2311.42	2174.76	2414.22	2361.89	2343.29
ENSMUSG00000086283	2810433D01Rik	FALSE	0.425949	2.54152	0.0110371	0.0292716	157.046	140.567	156.464	124.799	118.141	95.7474
ENSMUSG00000049800	Sertad2	TRUE	-0.311865	-6.54128	6.0993e-11	5.89167e-10	1975.83	1886.32	2013.05	2412.06	2511.65	2373.53
ENSMUSG00000006024	Napa	TRUE	-0.0429355	-0.984614	0.324814	0.466582	2267.35	2329.56	2246.43	2410.99	2262.35	2376.55
ENSMUSG00000024975	Pdcd4	TRUE	-0.119146	-2.66788	0.0076332	0.0213136	2235.94	2242.27	2124.93	2409.91	2341.42	2416.87
ENSMUSG00000038212	Hiatl1	TRUE	-0.0917741	-2.08675	0.0369106	0.0825658	2275.2	2218.47	2223.71	2409.91	2385.14	2364.46
ENSMUSG00000028468	Rgp1	TRUE	-0.0189504	-0.40488	0.685565	0.789794	2275.2	2481.46	2409.01	2407.76	2405.61	2444.08
ENSMUSG00000019804	Snx3	TRUE	-0.0503419	-1.12993	0.258505	0.392595	2312.5	2433.85	2392.41	2407.76	2504.21	2476.33
ENSMUSG00000017670	Elmo2	TRUE	0.270348	6.18499	6.21045e-10	5.40122e-09	2813.08	2976.85	2933.47	2406.69	2337.7	2488.42
ENSMUSG00000001017	Chtop	TRUE	-0.0991127	-2.14585	0.0318853	0.0729175	2185.88	2295.55	2298.88	2406.69	2505.14	2348.33
ENSMUSG00000022564	Grina	TRUE	-0.18045	-3.73987	0.000184117	0.000750709	2105.4	2251.34	2166.89	2405.61	2438.17	2544.87
ENSMUSG00000029328	Hnrpdl	TRUE	0.103345	1.74871	0.0803404	0.156732	2466.6	2798.87	2334.72	2404.53	2363.75	2297.94
ENSMUSG00000028559	Osbpl9	TRUE	-0.0878125	-1.87016	0.061461	0.125917	2139.75	2228.67	2199.23	2404.53	2209.33	2368.49
ENSMUSG00000026918	Brd3	TRUE	-0.175346	-3.8469	0.000119621	0.000502697	2168.21	2203.73	2221.08	2403.46	2499.56	2540.83
ENSMUSG00000069089	Cdk7	TRUE	-0.0546238	-1.09883	0.271844	0.408229	2208.46	2204.86	2347.83	2402.38	2326.54	2298.95
ENSMUSG00000037012	Hk1	TRUE	0.121869	2.85562	0.0042953	0.0128773	2654.08	2653.77	2575.97	2401.31	2412.12	2428.96
ENSMUSG00000037822	Smim14	TRUE	-0.328149	-6.92681	4.30428e-12	4.64164e-11	1784.43	1887.45	1869.7	2401.31	2299.56	2256.62
ENSMUSG00000032737	Inppl1	TRUE	0.15306	3.54323	0.000395264	0.0015063	2599.11	2648.1	2671.24	2400.23	2357.23	2365.47
ENSMUSG00000022517	Mgrn1	TRUE	0.0289836	0.643851	0.519672	0.655144	2369.43	2578.95	2490.31	2400.23	2424.21	2462.22
ENSMUSG00000038150	Ormdl3	TRUE	-0.0373236	-0.738511	0.460204	0.601221	2318.39	2390.77	2254.3	2400.23	2459.56	2280.8
ENSMUSG00000036879	Phkb	TRUE	0.106549	1.90964	0.0561802	0.11703	2651.13	2491.67	2737.68	2399.15	2360.02	2566.03
ENSMUSG00000051323	Pcdh19	TRUE	0.202887	2.80017	0.00510763	0.0149718	3003.5	2673.04	2917.74	2398.08	2470.72	2600.3
ENSMUSG00000035173	A630007B06Rik	TRUE	-0.304733	-6.29207	3.13262e-10	2.8007e-09	1933.63	1777.49	1914.28	2398.08	2251.19	2309.02
ENSMUSG00000024134	Six2	TRUE	-0.12525	-2.40676	0.0160948	0.0404892	2290.91	2352.23	2383.67	2394.85	2655.84	2610.38
ENSMUSG00000025786	Zdhhc3	TRUE	-0.0448341	-1.00135	0.316656	0.457534	2368.45	2353.37	2404.64	2393.78	2373.05	2587.2
ENSMUSG00000038965	Ube2l3	TRUE	-0.093728	-2.1196	0.03404	0.0771398	2184.9	2245.67	2205.35	2393.78	2272.58	2415.86
ENSMUSG00000036529	Sbf1	TRUE	0.0367764	0.774951	0.438369	0.579745	2530.4	2624.3	2487.68	2392.7	2440.03	2612.39
ENSMUSG00000054555	Adam12	TRUE	0.663083	13.6288	2.70139e-42	1.26326e-40	3902.59	3726.16	3947.43	2391.62	2333.98	2589.21
ENSMUSG00000035248	Zcchc6	TRUE	0.137712	3.23882	0.00120026	0.00411724	2595.18	2498.47	2573.35	2391.62	2300.49	2281.81
ENSMUSG00000050310	Rictor	TRUE	-0.323161	-6.62902	3.37921e-11	3.35042e-10	1824.68	1911.26	2052.38	2391.62	2404.68	2451.13
ENSMUSG00000055670	Zzef1	TRUE	-0.131107	-1.9391	0.0524886	0.110677	2356.67	2013.28	2383.67	2390.55	2461.42	2550.91
ENSMUSG00000030255	Sspn	TRUE	0.13073	2.71625	0.00660258	0.0187945	2752.23	2522.27	2691.35	2389.47	2515.38	2373.53
ENSMUSG00000022757	Tfg	TRUE	-0.0131217	-0.291758	0.770472	0.853899	2451.88	2462.19	2420.38	2388.4	2528.4	2480.36
ENSMUSG00000039239	Tgfb2	TRUE	0.80826	18.3201	5.72308e-75	5.84416e-73	4045.89	4134.26	4225.39	2387.32	2253.98	2447.1
ENSMUSG00000030161	Gabarapl1	TRUE	-0.198492	-3.89708	9.73609e-05	0.000414135	2164.29	2049.56	2092.59	2386.24	2507.93	2342.28
ENSMUSG00000027193	Api5	TRUE	-0.155391	-3.41098	0.000647293	0.00235838	2191.77	2213.93	2181.75	2385.17	2466.07	2482.38
ENSMUSG00000030591	Psmd8	TRUE	-0.00631917	-0.13965	0.888937	0.933723	2331.15	2437.25	2420.38	2385.17	2400.96	2432.99
ENSMUSG00000022371	Col14a1	TRUE	2.04051	18.6332	1.72875e-77	1.8147e-75	10798.9	8284.39	10284.6	2384.09	2211.19	2544.87
ENSMUSG00000018476	Kdm6b	TRUE	-0.199894	-3.91113	9.18636e-05	0.000392867	2173.12	1990.61	2222.83	2383.02	2427	2533.78
ENSMUSG00000028228	Cpne3	TRUE	-0.0305823	-0.584018	0.559208	0.689468	2372.37	2144.78	2529.64	2381.94	2405.61	2420.9
ENSMUSG00000015133	Lrrk1	TRUE	0.146498	3.20775	0.00133776	0.00454633	2779.71	2651.5	2770.02	2380.87	2474.44	2555.95
ENSMUSG00000041797	Abca9	TRUE	0.111412	1.77014	0.0767039	0.150727	2527.46	2306.89	2610.93	2379.79	2181.42	2338.25
ENSMUSG00000055436	Srsf11	TRUE	0.0952925	1.43803	0.150425	0.256478	2551.01	2616.36	2159.9	2379.79	2293.98	2179.01
ENSMUSG00000030016	Zfml	TRUE	-0.0722307	-1.36612	0.171902	0.286078	2347.84	2111.91	2232.45	2379.79	2308.86	2352.36
ENSMUSG00000015994	Fnta	TRUE	-0.0904992	-1.83926	0.065877	0.133129	2264.41	2298.95	2277.03	2378.71	2433.51	2469.28
ENSMUSG00000063856	Gpx1	TRUE	0.352313	7.28023	3.33247e-13	3.98595e-12	3072.21	3048.27	2947.46	2376.56	2446.54	2276.77
ENSMUSG00000002996	Hbp1	TRUE	0.0490784	1.03445	0.300925	0.441088	2517.64	2332.96	2398.53	2376.56	2293.98	2340.27
ENSMUSG00000028412	Slc44a1	TRUE	0.346759	6.3823	1.74452e-10	1.60854e-09	3199.81	2898.63	3049.73	2372.26	2401.89	2421.91
ENSMUSG00000027465	Tbc1d20	TRUE	-0.0435186	-0.978654	0.327751	0.469498	2225.14	2288.75	2259.54	2371.18	2346.07	2262.66
ENSMUSG00000074643	Cpne1	TRUE	-0.0720651	-1.53852	0.123922	0.220795	2265.39	2178.79	2297.13	2371.18	2363.75	2356.39
ENSMUSG00000046691	Chtf8	TRUE	-0.155424	-3.25064	0.00115145	0.00396613	2192.75	2110.77	2170.39	2369.03	2523.75	2317.09
ENSMUSG00000031778	Cx3cl1	TRUE	0.824873	13.3662	9.52265e-41	4.267e-39	3959.52	4698.8	4666.81	2367.95	2578.63	2573.09
ENSMUSG00000055737	Ghr	TRUE	0.110632	2.01054	0.0443741	0.0964244	2633.46	2320.49	2496.42	2367.95	2303.28	2234.44
ENSMUSG00000028108	Ecm1	TRUE	0.714395	12.1249	7.79625e-34	2.80646e-32	4168.59	4423.33	4208.78	2366.88	2650.26	2779.7
ENSMUSG00000028565	Nfia	TRUE	0.294065	5.15359	2.5554e-07	1.62127e-06	3016.26	2610.69	2975.43	2364.73	2321.89	2336.24
ENSMUSG00000002102	Psmc3	TRUE	0.281725	6.67044	2.55037e-11	2.56764e-10	2993.69	3041.46	2964.07	2364.73	2488.4	2544.87
ENSMUSG00000038056	Mll3	TRUE	-0.391878	-3.22997	0.00123805	0.00423526	1955.22	1529.23	2069.86	2363.65	2310.72	2618.44
ENSMUSG00000022914	Brwd1	TRUE	-0.317825	-5.07101	3.95705e-07	2.43141e-06	1880.62	1725.35	2009.55	2358.27	2320.95	2329.18
ENSMUSG00000063524	Eno1	TRUE	-0.930459	-18.1937	5.78856e-74	5.79281e-72	1235.75	1265.1	1247.34	2358.27	2319.09	2465.24
ENSMUSG00000069237	C78339	TRUE	-0.0413578	-0.807247	0.419524	0.562074	2321.33	2117.58	2294.51	2358.27	2400.96	2174.98
ENSMUSG00000025006	Sorbs1	TRUE	-0.0991502	-1.60939	0.10753	0.197297	2119.14	2031.42	2365.31	2358.27	2219.56	2410.82
ENSMUSG00000029426	Scarb2	TRUE	-0.266758	-5.55233	2.81879e-08	2.04213e-07	2006.26	1854.58	2037.52	2356.12	2404.68	2343.29
ENSMUSG00000021945	Zmym2	TRUE	-0.48163	-7.71197	1.23892e-14	1.66048e-13	1722.6	1533.77	1735.09	2353.97	2307	2317.09
ENSMUSG00000004936	Map2k1	TRUE	-0.574561	-11.2615	2.03171e-29	6.28826e-28	1556.72	1678.87	1663.41	2353.97	2419.56	2519.67
ENSMUSG00000028007	Snx7	TRUE	0.369743	9.28118	1.67605e-20	3.26318e-19	3126.19	3080.01	3046.23	2351.82	2400.03	2406.79
ENSMUSG00000008976	Gabpa	TRUE	-0.0104204	-0.18899	0.8501	0.905682	2521.57	2289.88	2493.8	2351.82	2476.31	2533.78
ENSMUSG00000015961	Adss	TRUE	-0.128176	-2.7675	0.00564872	0.0163721	2094.6	2212.8	2241.19	2350.74	2445.61	2359.42
ENSMUSG00000039000	Ube3c	TRUE	-0.210924	-4.81682	1.45866e-06	8.26885e-06	2043.56	1998.55	2121.44	2350.74	2355.37	2434
ENSMUSG00000022536	Glyr1	TRUE	0.181213	4.43848	9.0598e-06	4.56212e-05	2742.41	2771.67	2729.81	2349.67	2454.91	2462.22
ENSMUSG00000026356	Dars	TRUE	-0.107384	-2.35569	0.0184885	0.0455343	2120.12	2325.03	2242.06	2348.59	2413.05	2437.02
ENSMUSG00000074212	Dnajb14	TRUE	-0.247725	-4.17776	2.94389e-05	0.000137111	1984.67	1761.62	2018.29	2348.59	2213.98	2291.89
ENSMUSG00000002496	Tsc2	TRUE	0.126988	3.1747	0.00149991	0.00503808	2550.03	2554.01	2544.5	2346.44	2307	2351.35
ENSMUSG00000053929	Cyhr1	TRUE	0.0174857	0.351985	0.724849	0.820195	2426.36	2268.35	2300.63	2346.44	2385.14	2180.02
ENSMUSG00000055531	Cpsf6	TRUE	-0.101483	-2.23119	0.0256689	0.0605461	2121.1	2211.66	2149.41	2346.44	2321.89	2283.83
ENSMUSG00000040761	Spen	TRUE	-0.183635	-2.77087	0.0055907	0.0162293	1956.2	2049.56	2374.05	2344.29	2332.12	2576.11
ENSMUSG00000035437	Rabgap1	TRUE	-0.108674	-2.41041	0.0159347	0.0401537	2179.99	2185.59	2228.95	2343.21	2311.65	2458.19
ENSMUSG00000053774	Ubxn7	TRUE	-0.104251	-1.62535	0.104089	0.192092	2204.53	1876.12	2221.96	2337.83	2255.84	2190.1
ENSMUSG00000052397	Ezr	TRUE	-0.580002	-10.3795	3.07307e-25	7.96716e-24	1424.21	1669.8	1631.07	2336.75	2276.3	2448.11
ENSMUSG00000035212	Leprot	TRUE	0.0378817	0.908457	0.363637	0.506829	2481.32	2427.05	2436.99	2336.75	2391.65	2425.94
ENSMUSG00000025871	4833439L19Rik	TRUE	-0.199935	-4.49867	6.83785e-06	3.50796e-05	1927.74	1995.15	1998.19	2334.6	2202.81	2266.69
ENSMUSG00000041852	Tcf20	TRUE	-0.252134	-4.31923	1.56574e-05	7.61611e-05	1914	1851.18	2104.83	2334.6	2290.26	2374.54
ENSMUSG00000028932	Psmc2	TRUE	-0.0675772	-1.60177	0.109206	0.199501	2257.53	2304.62	2208.85	2332.45	2387	2370.5
ENSMUSG00000036046	5031439G07Rik	TRUE	-0.0536841	-1.09551	0.273294	0.409749	2049.45	2168.59	2266.54	2330.3	2164.67	2241.5
ENSMUSG00000019189	Rnf145	TRUE	0.189003	3.97032	7.17752e-05	0.000312748	2664.87	2564.22	2770.89	2329.22	2310.72	2383.61
ENSMUSG00000051367	Six1	TRUE	0.0671829	1.39045	0.164393	0.275937	2474.45	2538.14	2664.25	2327.07	2550.72	2449.12
ENSMUSG00000042548	Asxl1	TRUE	-0.0218581	-0.456161	0.648274	0.760837	2231.03	2227.54	2396.78	2327.07	2327.47	2311.04
ENSMUSG00000037049	Smpd1	TRUE	0.117825	2.57533	0.0100143	0.0269448	2600.09	2555.15	2733.31	2326	2480.96	2465.24
ENSMUSG00000024072	Yipf4	TRUE	-0.150733	-2.85413	0.00431554	0.0129277	2083.8	2065.43	1994.69	2326	2346.07	2145.75
ENSMUSG00000005886	Ncoa2	TRUE	-0.205941	-3.69481	0.00022005	0.000882491	2084.78	1901.06	2052.38	2326	2202.81	2443.07
ENSMUSG00000032185	Carm1	TRUE	-0.0881875	-1.87644	0.0605952	0.124534	2271.28	2217.33	2276.15	2326	2369.33	2497.5
ENSMUSG00000024937	Ehbp1l1	TRUE	0.510459	8.85872	8.09394e-19	1.42939e-17	2951.48	3573.13	3386.26	2324.92	2281.88	2348.33
ENSMUSG00000026425	Srgap2	TRUE	0.0880869	1.87145	0.0612826	0.125688	2507.83	2487.13	2528.77	2324.92	2358.16	2395.7
ENSMUSG00000058594	Fbxo18	TRUE	0.253336	6.20775	5.37482e-10	4.70172e-09	2876.88	2792.07	2790.12	2323.84	2423.28	2347.32
ENSMUSG00000005667	Mthfd2	TRUE	-2.24026	-31.7888	9.23425e-222	6.02675e-219	444.636	525.993	479.88	2323.84	2349.79	2164.9
ENSMUSG00000037896	Rcor1	TRUE	-0.0578396	-1.13786	0.255178	0.389	2231.03	2253.61	2417.76	2323.84	2364.68	2500.52
ENSMUSG00000018765	Fxr2	TRUE	-0.18037	-3.24831	0.00116091	0.00399506	1843.33	2048.43	2107.45	2322.77	2236.3	2241.5
ENSMUSG00000062421	Arf2	TRUE	0.477677	9.58601	9.1556e-22	1.93026e-20	3101.66	3277.25	3360.91	2320.62	2404.68	2268.71
ENSMUSG00000027247	Arhgap1	TRUE	0.136726	3.25135	0.00114857	0.00395986	2512.73	2489.4	2621.42	2320.62	2295.84	2323.13
ENSMUSG00000024404	Riok3	TRUE	-0.306267	-6.62315	3.51629e-11	3.48173e-10	1954.24	1893.12	1960.6	2320.62	2353.51	2510.6
ENSMUSG00000026499	Acbd3	TRUE	-0.0362235	-0.832538	0.405105	0.548484	2299.74	2298.95	2389.78	2320.62	2427.93	2418.88
ENSMUSG00000037071	Scd1	TRUE	0.614452	12.9447	2.5175e-38	1.04682e-36	3571.81	3472.23	3578.56	2319.54	2373.98	2245.53
ENSMUSG00000030172	Erc1	TRUE	-0.120214	-2.50602	0.0122099	0.0319446	2121.1	2154.98	2263.04	2319.54	2344.21	2447.1
ENSMUSG00000054414	Slc30a7	TRUE	0.172551	3.90465	9.43616e-05	0.000402633	2713.95	2550.61	2731.56	2318.47	2370.26	2410.82
ENSMUSG00000004056	Akt2	TRUE	0.0399836	0.882169	0.377685	0.521423	2410.65	2320.49	2377.55	2318.47	2298.63	2299.95
ENSMUSG00000021835	Bmp4	TRUE	-0.118827	-2.047	0.0406582	0.0897265	2361.58	2073.37	2237.69	2317.39	2383.28	2548.9
ENSMUSG00000020936	Nmt1	TRUE	-0.225283	-5.05861	4.22328e-07	2.58652e-06	1951.29	1980.41	1998.19	2316.31	2294.91	2322.13
ENSMUSG00000078652	Psme3	TRUE	-0.0810777	-1.6862	0.0917581	0.173986	2024.91	2225.27	2189.62	2316.31	2198.16	2297.94
ENSMUSG00000029710	Ephb4	TRUE	-0.0189627	-0.37972	0.704153	0.803462	2372.37	2312.56	2485.94	2315.24	2453.98	2499.51
ENSMUSG00000053119	Chmp3	TRUE	-0.170175	-3.83034	0.000127966	0.000534178	2061.23	2052.96	2071.61	2314.16	2274.44	2373.53
ENSMUSG00000037720	Tmem33	TRUE	-0.215982	-4.86383	1.15139e-06	6.62709e-06	1982.7	1947.53	2052.38	2314.16	2342.35	2296.93
ENSMUSG00000007029	Vars	TRUE	-0.43878	-7.64424	2.10188e-14	2.75558e-13	1585.18	1895.39	1697.5	2314.16	2351.65	2343.29
ENSMUSG00000061244	Exoc5	TRUE	-0.0218876	-0.503282	0.614766	0.73579	2170.18	2326.16	2318.11	2314.16	2276.3	2328.17
ENSMUSG00000046768	Rhoj	TRUE	0.343987	6.34233	2.26314e-10	2.0589e-09	2702.17	3177.5	2933.47	2313.09	2340.49	2284.84
ENSMUSG00000015839	Nfe2l2	TRUE	-0.250119	-4.87695	1.0774e-06	6.23229e-06	1881.61	2106.24	2082.98	2313.09	2393.51	2510.6
ENSMUSG00000032252	Glce	TRUE	-0.791485	-15.6277	4.71864e-55	3.24915e-53	1478.19	1338.79	1409.05	2313.09	2475.38	2529.75
ENSMUSG00000005893	Nr2c2	TRUE	-0.0915909	-1.89777	0.0577269	0.119688	2265.39	2059.76	2237.69	2313.09	2314.44	2372.52
ENSMUSG00000085208	4632419I22Rik	FALSE	0.394361	8.0167	1.08627e-15	1.56939e-14	2023.93	1960	1978.08	1471.77	1488.39	1576.3
ENSMUSG00000073411	H2-D1	TRUE	0.679456	5.94279	2.80219e-09	2.26392e-08	3257.72	3557.26	3648.49	2312.01	2047.46	2174.98
ENSMUSG00000019055	Plod1	TRUE	-0.0374751	-0.799107	0.424228	0.566808	2294.83	2364.7	2332.09	2310.93	2375.84	2486.41
ENSMUSG00000021686	Ap3b1	TRUE	-0.20644	-4.69275	2.69554e-06	1.47137e-05	2023.93	1996.28	2075.11	2308.78	2315.37	2412.83
ENSMUSG00000021690	Jmy	TRUE	-0.418587	-6.8988	5.24428e-12	5.61497e-11	1814.86	1583.65	1791.9	2307.71	2338.63	2298.95
ENSMUSG00000019849	Prep	TRUE	-0.495546	-9.07285	1.15942e-19	2.13808e-18	1601.87	1655.06	1723.72	2307.71	2268.86	2449.12
ENSMUSG00000029775	Klhdc10	TRUE	0.131452	2.76511	0.00569045	0.0164743	2619.72	2444.05	2551.49	2306.63	2345.14	2302.98
ENSMUSG00000027007	Ssfa2	TRUE	0.34287	6.34948	2.16048e-10	1.96909e-09	2745.36	2770.53	3025.25	2302.33	2134.91	2303.99
ENSMUSG00000020277	Pfkl	TRUE	-1.04932	-19.2656	1.04364e-82	1.16045e-80	1171.95	1155.14	1184.4	2302.33	2454.91	2510.6
ENSMUSG00000028961	Pgd	TRUE	0.0812299	1.42303	0.154728	0.262472	2365.5	2515.47	2393.28	2302.33	2349.79	2220.33
ENSMUSG00000022389	Tef	TRUE	0.0364915	0.666916	0.504826	0.642525	2572.61	2196.93	2260.42	2302.33	2309.79	2244.52
ENSMUSG00000042605	Atxn2	TRUE	-0.214702	-3.99163	6.56202e-05	0.000287851	2030.8	2001.95	2171.26	2301.25	2385.14	2517.65
ENSMUSG00000035181	Heatr5a	TRUE	0.209162	3.77605	0.000159337	0.000656009	2561.81	2521.14	2738.55	2300.18	2102.35	2370.5
ENSMUSG00000041530	Ago1	TRUE	-0.187096	-3.41186	0.000645201	0.00235304	2089.69	1903.32	1982.45	2299.1	2283.75	2223.36
ENSMUSG00000024966	Stip1	TRUE	-0.180357	-3.55112	0.000383599	0.00146482	1935.59	2169.72	2124.93	2298.02	2348.86	2409.81
ENSMUSG00000026727	Rsu1	TRUE	0.198654	4.38977	1.13468e-05	5.64184e-05	2674.69	2690.05	2806.73	2295.87	2373.98	2452.14
ENSMUSG00000028664	Ephb2	TRUE	0.0301962	0.511283	0.609153	0.731227	2478.38	2257.01	2554.99	2294.8	2377.7	2472.3
ENSMUSG00000003420	Fcgrt	TRUE	0.5724	11.6315	2.85048e-31	9.38345e-30	3716.1	3386.08	3435.21	2293.72	2394.44	2397.72
ENSMUSG00000036503	Rnf13	TRUE	-0.158705	-3.38791	0.000704285	0.00254932	2049.45	1889.72	2048.89	2293.72	2202.81	2197.15
ENSMUSG00000030061	Uba3	TRUE	-0.230257	-5.52064	3.37763e-08	2.41782e-07	1924.79	1950.94	1983.33	2293.72	2292.12	2288.87
ENSMUSG00000054874	Pcnxl3	TRUE	0.15045	3.36295	0.000771133	0.00276793	2513.72	2567.62	2663.38	2292.64	2389.79	2295.92
[truncated: 13,012 more rows]
