# Supplementary material for: SLC38A2 provides proline to fulfill unique synthetic demands arising during osteoblast differentiation and bone formation
Source: eLife journal article supplement (doi:10.7554/elife.76963), 2022-03-09
Supplement: supp [file Figure 1 Supplement 1B.xlsx]

## Sheet: Sheet1
	Runx2			Osx			Col1a1			Bglap
GM	0.994825	1.00341	1.00177	1.07852	0.976302	0.945179	0.977935	1.0004	1.02166	0.541543	0.936495	1.52196
OM	1.35709	1.25027	1.41022	2.3546	2.6894	2.63136	1.79712	1.74956	1.911	22.7271	22.8245	21.1194
