# Supplementary material for: SLC38A2 provides proline to fulfill unique synthetic demands arising during osteoblast differentiation and bone formation
Source: eLife journal article supplement (doi:10.7554/elife.76963), 2022-03-09
Supplement: supp [file Figure 1C.xlsx]

## Sheet: Sheet1
Induced	Suppressed
0.0546448	0.0708861
0.0456163	0.128205
0.0545455	0.0676998
0.0512985	0.0421286
0.080402	0.0481735
0.0335196	0.0300958
0.011236	0.0305011
0.08	0.0687161
0.0778968	0.0575419
0.0585366	0.0422374
0.0411765	0.0682167
0.163167	0.04375
0.0447427	0.0454908
0.189952	0.075662
0.0685619	0.0366133
0.0761317	0.0437811
0.0905336	0.0567108
0.0638298	0.0515643
0.0789278	0.0655022
0.0851711	0.0458372
0.0849539	0.052531
0.0865604	0.0520799
0.0439883	0.0359022
0.0424773	0.0793369
0.0240601	0.0676533
0.03125	0.0540865
0.0784201	0.0786463
0.0648379	0.0402622
0.0674157	0.0414866
0.0746269	0.075491
0.0768398	0.0724324
0.0447917	0.0516237
0.0376471	0.0429498
0.158712	0.0691489
0.0528926	0.0961538
0.157175	0.0996925
0.0579268	0.0692042
0.0260223	0.0767386
0.0673181	0.0643275
0.0458667	0.0586596
0.06062	0.0443459
0.0357143	0.0378925
0.0714859	0.0656646
0.0887868	0.0717949
0.0583333	0.078534
0.175083	0.0195955
0.0697369	0.0423924
0.0846948	0.0414634
0.0667099	0.0400314
0.0622755	0.143124
0.0359788	0.0565111
0.0834575	0.0549085
0.0535932	0.0551749
0.0789127	0.0292683
0.0529192	0.0482456
0.0677055	0.0484979
0.0902174	0.064257
0.08577	0.0359435
0.0446809	0.0782325
0.131967	0.0544568
0.0504451	0.0476529
0.0643863	0.0395968
0.159091	0.0381558
0.0918964	0.0980993
0.0682408	0.0957367
0.0465465	0.0808298
0.0421941	0.0776053
0.0705726	0.0454871
0.0561497	0.0505618
0.0580247	0.0441177
0.0421407	0.0491255
0.102941	0.0959596
0.0660377	0.0776653
0.0755287	0.03996
0.0914179	0.0470534
0.0977012	0.0402542
0.0559006	0.0685794
0.0444686	0.0996276
0.0704225	0.0840807
0.0625724	0.0556764
0	0.0406537
0.0739935	0.0297297
0.0397276	0.0385305
0.0801619	0.0520376
0.0575816	0.0530303
0.0673953	0.0539474
0.0589041	0.159552
0.0714286	0.0945274
0.0478353	0.0444727
0.075719	0.0411255
0.0600677	0.043364
0.0433436	0.0445344
0.083499	0.0762829
0.0601121	0.0536399
0.0940519	0.0306383
0.0810644	0.0539314
0.0946915	0.0638637
0.0749574	0.0446852
0.0856164	0.0885827
0.0773418	0.0840622
0.0589875	0.0177218
0.0492754	0.0238095
0.0595238	0.0420712
0.0734824	0.0534442
0.0642458	0.0829103
0.0444727	0.0315457
0.0528707	0.0204082
0.106482	0.0896988
0.0689545	0.0841443
0.0478469	0.0783582
0.0905753	0.009375
0.0874722	0.0426966
0.0436782	0.0703172
0.035949	0.0460879
0.0647866	0.015
0.0667031	0.0576619
0.0959916	0.0316249
0.0281996	0.0317164
0.0510441	0.063907
0.0590329	0.0588029
0.038565	0.0189497
0.0337838	0.0132626
0.0567108	0.0603448
0.0460526	0.0339207
0.0966387	0.0652898
0.0737538	0.0577731
0.0382244	0.0741307
0.104336	0.064
0.0668524	0.0737074
0.0570652	0.0298507
0.0602637	0.0500229
0.0841554	0.0629302
0.0683125	0.029549
0.143657	0.0586592
0.0567498	0.0357143
0.046748	0.0425733
0.0220883	0.0655738
0.077142	0.06139
0.0253521	0.0647331
0.0902014	0.0373514
0.112011	0.0593607
0.0466718	0.0501475
0.071599	0.077325
0.0494038	0.0441177
0.0882973	0.107849
0.0530504	0.0475059
0.0634708	0.0410023
0.0414348	0.0572738
0.0326876	0.0297619
0.0649597	0.0936455
0.0652174	0.112797
0.0377834	0.0755319
0.0646651	0.0236686
0.0673539	0.0475624
0.0363115	0.0495049
0.079906	0.0750853
0.0553394	0.072115
0.0620224	0.0584551
0.0459282	0.0166667
0.0478364	0.0660413
0.0891988	0.174811
0.08125	0.0567506
0.0892449	0.0918919
0.0461775	0.0793037
0.0659959	0.0920974
0.110288	0.0307918
0.0518868	0.0443614
0.081803	0.0767905
0.0638831	0.0548327
0.0350975	0.0499396
0.0533784	0.0351219
0.0701281	0.082495
0.0759724	0.0324881
0.0466749	0.0734463
0.0111554	0.0576923
0.0798722	0.0545455
0.0628779	0.0353224
0.0571318	0.0338733
0.0364963	0.128134
0.0564924	0.0807882
0.139606	0.053528
0.0647383	0.0948905
0.0541703	0.0979772
0.0546218	0.0325329
0.0946291	0.0481039
0.0457728	0.151235
0.0447761	0.0306407
0.035035	0.0358114
0.0799458	0.0587849
0.0526739	0.0381963
0.0505051	0.0996386
0.1897	0.0468445
0.0522193	0.0386546
0.0492505	0.0418446
0.0738007	0.0356083
0.0810943	0.0340988
0.106667	0.0417457
0.0522648	0.0572328
0.0781497	0.0787855
0.0539867	0.0679477
0.0362694	0.0548204
0.0471311	0.0373134
0.0351494	0.0567434
0.0665138	0.065131
0.0518632	0.0808824
0.0570728	0.0305623
0.0621849	0.0444674
0.0749763	0.0577223
0.0484164	0.0303337
0.0561915	0.0637871
0.0334833	0.0642265
0.0379437	0.0528124
0.049495	0.0335307
0.0241936	0.0761454
0.0633803	0.0577531
0.0285714	0.054917
0.0634202	0.0473474
0.0734072	0.0685225
0.0648855	0.0533333
0.0846154	0.0558483
0.188235	0.0448263
0.0687075	0.0569185
0.0203349	0.0437033
0.072093	0.0526316
0.040682	0.0572278
0.0202156	0.0475525
0.0399023	0.151919
0.0662252	0.0399408
0.0454546	0.0303644
0.073903	0.0787589
0.0642202	0.0344828
0.0522332	0.0778426
0.061017	0.0315091
0.0654339	0.0683603
0.113137	0.0262548
0.131274	0.103846
0.1219	0.0476948
0.0364742	0.0582611
0.0195618	0.0493469
0.126462	0.0485972
0.138295	0.105392
0	0.0412606
0.0338809	0.040931
0.0448718	0.0351759
0.0664653	0.0930233
0.0489796	0.0533865
0.193314	0.0578224
0.040201	0.126725
0.0642497	0.030303
0.0473373	0.0368311
0.130152	0.021978
0.0537084	0.0393701
0.0615385	0.0743073
0.0655509	0.0748079
0.0401235	0.0260586
0.0674916	0.147611
0.0624381	0.0726842
0.0649627	0.0468249
0.0984673	0.0411081
0.166559	0.0627615
0.0748373	0.0550186
0.110724	0.0714286
0.0940683	0.0380711
0.037037	0.0690705
0.0545565	0.09375
0.0847145	0.0519707
0.0665702	0.0669413
0.0700046	0.0444065
0	0.0545693
0.0384615	0.106195
0.0595238	0.0565327
0.0265487	0.110075
0.0693956	0.0312283
0.0380179	0.0434513
0.0664864	0.103142
0.0732143	0.0431796
0.0834697	0.0658683
0.0466603	0.0727532
0.0523187	0.0160827
0.0552585	0.0734908
0.0459126	0.095092
0.0547619	0.0810912
0.0455841	0.122511
0.0509332	0.0956052
0.0536278	0.0316062
0.0727167	0.0466623
0.0282486	0.0248773
0.0504451	0.0417336
0.045819	0.0234742
0.191512	0.0656566
0.066879	0.0477612
0.0788447	0.0435583
0.056	0.0352413
0.0297398	0.0329506
0.0421546	0.0250804
0.0209974	0.0521262
0.061674	0.0126024
0.0869565	0.0366492
0.0646872	0.0293018
0.0690141	0.0376293
0.0492462	0.0516499
0.0576923	0.0593111
0.0696517	0.0550459
0.0558003	0.0525915
0.0903614	0.036999
0.0580645	0.073984
0.0388571	0.0361795
0.0291971	0.0589601
0.00153072	0.0236887
0.0630063	0.0244698
0.0663524	0.0467128
0.0673405	0.0409234
0.061138	0.0527183
0.0628095	0.03305
0.0696056	0.0815308
0.0442968	0.0540894
0.0698027	0.0359066
0.0711246	0.0172414
0.0758437	0.0623306
0.0432211	0.0952381
0.0604651	0.0676397
0.0709571	0.0370473
0.0216802	0.044335
0.0451128	0.0566908
0.0741808	0.0688705
0.0800942	0.0462919
0.140927	0.0522325
0.121809	0.0665468
0.0507614	0.0234899
0.0529344	0.058907
0.0594059	0.0376884
0.0430408	0.047043
0.0806723	0.0495627
0.056213	0.0379487
0.0762565	0.0514944
0.0940215	0.0476191
0.0546928	0.0608622
0.094012	0.0318841
0.0494988	0.0838881
0.0639333	0.0764488
0.0403429	0.0834485
0.0541237	0.040404
0.0775348	0.0414146
0.0544	0.0358056
0.0682764	0.0794798
0.0734463	0.0594744
0.066055	0.087474
0.0651769	0.0738255
0.136048	0.0508361
0.0587349	0.0572792
0.0441729	0.0425273
0.129456	0.0997924
0.0589812	0.0849111
0.0436006	0.0593424
0.0722115	0.141384
0.140037	0.05125
0.0431035	0.0894932
0.0716023	0.049098
0.0630841	0.0449658
0.0899796	0.0485437
0.0706482	0.0589349
0.0301863	0.0529664
0.0956522	0.0892857
0.0530014	0.0933933
0.0331771	0.0963351
0.0629454	0.031579
0.0699029	0.0176471
0.0442656	0.027592
0.058623	0.100699
0.0518609	0.0585666
0.117359	0.039794
0.0614035	0.068306
0.0698895	0.0425258
0.172531	0.0792262
0.109002	0.0393375
0.114734	0.0518784
0.11583	0.0554723
0.0754336	0.0329704
0.0942241	0.0569325
0.0907179	0.0362903
0.119048	0.0362219
0.0491493	0.0524476
0.0965682	0.0692612
0.06	0.0597475
0.0544489	0.0554441
0.044568	0.0478194
0.0435065	0.0459477
0.048913	0.0733475
0.0501859	0.0965692
0.102273	0.0537255
0.117647	0.0849057
0.116461	0.0511364
0.058209	0.0405933
0.0407609	0.0477663
0.0389381	0.0680147
0.0881356	0.041411
0.0314136	0.0617135
0.0510379	0.0699199
0.0358744	0.0548317
0.168109	0.0651163
0.0272905	0.0817518
0.0750257	0.0398773
0.0416089	0.0501792
0.0148148	0.0773114
0.0174419	0.0656908
0.0775348	0.0671937
0.0411471	0.107276
0.0826959	0.0435374
0.0585106	0.058642
0.0698734	0.11447
0.07	0.0164706
0.0705882	0.0457079
0.0704753	0.0259128
0.0966443	0.0520886
0.0694917	0.0567227
0.056338	0.0750277
0.0687978	0.0290038
0.0743243	0.0680958
0.0484171	0.168487
0.0364583	0.0603739
0.0792683	0.0614835
0.0720339	0.0525362
0.027957	0.0825336
0.0475059	0.0462735
0.0365591	0.0597484
0.0492958	0.0480142
0.104878	0.0561056
0.096672	0.114126
0.068358	0.103935
0.0411523	0.0923806
0.060449	0.0950324
0.0573066	0.115588
0.102222	0.0477286
0.04643	0.123246
0.049951	0.0533881
0.039622	0.0488281
0.0410065	0.108946
0.0744161	0.0875782
0.0450572	0.05807
0.111821	0.120275
0.177966	0.0520852
0.0664781	0.0672269
0.110464	0.0490455
0.065388	0.053719
0.135948	0.0483146
0.0455841	0.0664336
0.0612574	0.0803213
0.135021	0.0727095
0.0608553	0.0538044
0.0473538	0.0669716
0.0432816	0.0407125
0.0625	0.0752688
0.0390071	0.0421245
0.0535583	0.0822115
0.090815	0.0665102
0.0694006	0.0554031
0.134845	0.0485584
0.068254	0.0446194
0.0864865	0.0474453
0.0607533	0.0420168
0.0705596	0.0528406
0.0604297	0.0373832
0.0398671	0.0484688
0.0281041	0.106996
0.0445619	0.0957447
0.0396825	0.0431493
0.0348837	0.00943396
0.125301	0.0526913
0.0392648	0.0543735
0.0976645	0.0791367
0.0490826	0.0497076
0.101322	0.0805556
0.0557769	0.0500533
0.0539084	0.113924
0.074238	0.0605501
0.0366041	0.026873
0.118056	0.0492285
0.0464259	0.0527523
0.0567376	0.0330749
0.0691244	0.0638498
0.134426	0.05
0.0345066	0.0899789
0.0428571	0.04408
0.0523077	0.0487562
0.0999343	0.0538922
0.0631068	0.0476529
0.0325203	0.0751867
0.0389972	0.0525371
0.0540077	0.0641656
0.0312185	0.086669
0.010929	0.0522006
0.0113419	0.039971
0.17561	0.0736544
0.105263	0.0516667
0.102305	0.0570824
0.0168453	0.0519403
0.0838736	0.076252
0.0802731	0.0298813
0.0729783	0.0435599
0.0725664	0.0517529
