# Supplementary material for: SLC38A2 provides proline to fulfill unique synthetic demands arising during osteoblast differentiation and bone formation
Source: eLife journal article supplement (doi:10.7554/elife.76963), 2022-03-09
Supplement: supp [file Figure 2 Supplement 1A.xlsx]

## Sheet: Sheet1
Pro	Gln
0.0526044	0.805886
0.0567582	0.767856
0.0532637	0.763401
