# Supplementary material for: SLC38A2 provides proline to fulfill unique synthetic demands arising during osteoblast differentiation and bone formation
Source: eLife journal article supplement (doi:10.7554/elife.76963), 2022-03-09
Supplement: supp [file Figure 2 Supplement 1B.xlsx]

## Sheet: Sheet1
Pro	Gln	Ala
1.3497	1.23259	1.1327
1.42517	1.18098	0.990263
1.41634	1.17329	1.15631
