# Supplementary material for: SLC38A2 provides proline to fulfill unique synthetic demands arising during osteoblast differentiation and bone formation
Source: eLife journal article supplement (doi:10.7554/elife.76963), 2022-03-09
Supplement: supp [file Figure 2 Supplement 1C.xlsx]

## Sheet: Sheet1
		Proline			Glutamine			Glucose			Unlabeled
24h	aKG	0.001301	-0.00793	-0.00044	0.4096	0.407907	0.415603	0.023434	0.018849	0.024021	0.565665	0.581178	0.560818
	malate	0	0	0	0.300623	0.326324	0.312801	0.034471	0.005103	0.00764	0.664905	0.668573	0.679559
	citrate	-0.00085	0.000274	-0.00076	0.249053	0.272813	0.246739	0.056044	0.047821	0.051204	0.695755	0.679091	0.702812
72h	aKG	0.006045	0.015755	0.013941	0.357632	0.362532	0.371871	0.178475	0.182049	0.173251	0.457847	0.439665	0.440937
	malate	0	0	0	0.303769	0.306855	0.286177	0.121526	0.12931	0.125709	0.574705	0.563835	0.588114
	citrate	0.001177	0.005203	0.007611	0.286199	0.291425	0.290462	0.266155	0.270315	0.252117	0.446468	0.433057	0.449811
