# Supplementary material for: SLC38A2 provides proline to fulfill unique synthetic demands arising during osteoblast differentiation and bone formation
Source: eLife journal article supplement (doi:10.7554/elife.76963), 2022-03-09
Supplement: supp [file Figure 2B.xlsx]

## Sheet: Sheet1
Pro	Gln
0.0170549	0.45318
0.0160055	0.495898
0.0163407	0.526707
