# Supplementary material for: SLC38A2 provides proline to fulfill unique synthetic demands arising during osteoblast differentiation and bone formation
Source: eLife journal article supplement (doi:10.7554/elife.76963), 2022-03-09
Supplement: supp [file Figure 2C.xlsx]

## Sheet: Sheet1
Pro	Gln
3.73593	2.12971
3.93013	2.15552
4.03121	2.28029
