# Supplementary material for: SLC38A2 provides proline to fulfill unique synthetic demands arising during osteoblast differentiation and bone formation
Source: eLife journal article supplement (doi:10.7554/elife.76963), 2022-03-09
Supplement: supp [file Figure 2D.xlsx]

## Sheet: Sheet1
Total Protein		Collagen
GM	OM	GM	OM
0.929534	1.28102	0.941176	1.42048
0.781022	1.28804	0.825708	1.33987
1.28944	1.56654	1.23311	1.31373
0.751128	1.61371	0.929114	1.5552
0.957932	1.63366	1.12785	1.91753
1.29094	1.38797	0.943038	1.43756
