# Supplementary material for: SLC38A2 provides proline to fulfill unique synthetic demands arising during osteoblast differentiation and bone formation
Source: eLife journal article supplement (doi:10.7554/elife.76963), 2022-03-09
Supplement: supp [file Figure 3 Supplement 1A.xlsx]

## Sheet: Sheet1
	0.3mM Pro			0mM Pro
Pro	0.594898	1.0312	1.3739	0.369495	0.260949	0.252623
Gln	0.92604	1.2211	0.852858	1.2213	0.826983	1.0394
Glu	1.16514	1.02504	0.80982	0.518433	0.649793	0.885425
Asn	1.53834	0.554436	0.907221	0.406291	1.8934	1.53204
Val	0.78346	1.16809	1.04845	1.09998	1.40017	1.53494
