# Supplementary material for: SLC38A2 provides proline to fulfill unique synthetic demands arising during osteoblast differentiation and bone formation
Source: eLife journal article supplement (doi:10.7554/elife.76963), 2022-03-09
Supplement: supp [file Figure 3 Supplement 1C.xlsx]

## Sheet: Sheet1
	0.3mM Pro			0mM Pro
Runx2	0.435189	1.03333	0.639407	0.979365	0.838597	1.21759
Sp7	1.05565	1.02557	0.611217	0.800173	1.01226	1.23459
Col1a1	1.18452	1.24968	0.793519	0.889155	0.993447	1.13208
Atf2	0.652073	0.900681	0.747869	1.07768	0.823131	1.1273
Pax1	0.967353	1.23087	0.619891	1.0446	0.848167	1.12867
Rps6	1.47262	1.68712	0.730896	1.04939	1.01119	0.942393
Eif2a	0.905637	1.18825	0.615162	0.938859	0.995971	1.06943
Atf4	0.96216	0.983668	1.10024	1.045	0.917091	1.04345
Tuba1	1.10621	0.935429	1.26058	1.00519	0.979446	1.01572
Erk2	1.20036	0.971397	1.29076	0.83639	1.02393	1.16767
Smad1	1.13523	1.08983	1.22623	0.763458	1.10532	1.18502
Eef2	1.1374	0.965655	1.20654	0.770703	1.07515	1.20683
4ebp1	0.97139	1.16301	1.14028	1.04352	1.0401	0.92135
Akt1	0.986606	0.922304	1.08054	0.942951	1.03132	1.02829
Phgdh	0.927921	0.918158	1.01603	1.16689	0.923488	0.927978
mTOR	1.19554	1.0376	1.25566	0.8091	1.12799	1.0957
