# Supplementary material for: SLC38A2 provides proline to fulfill unique synthetic demands arising during osteoblast differentiation and bone formation
Source: eLife journal article supplement (doi:10.7554/elife.76963), 2022-03-09
Supplement: supp [file Figure 3 Supplement 1E.xlsx]

## Sheet: Sheet1
		0mM Pro			0.3mM Pro
	Basal	1	1	1	1	1	1
CHX Washout	0h	0.145017	0.180189	0.198529	0.145017	0.180189	0.198529
	1h	0.151598	0.205653	0.20461	0.125779	0.126138	0.189685
	4h	0.0766838	0.155699	0.203336	0.12381	0.100386	0.247223
	8h	0.0931774	0.109544	0.127887	0.0928318	0.0992758	0.136734
	24h	0.295318	0.370276	0.326508	0.52242	0.585763	0.624154
