# Supplementary material for: SLC38A2 provides proline to fulfill unique synthetic demands arising during osteoblast differentiation and bone formation
Source: eLife journal article supplement (doi:10.7554/elife.76963), 2022-03-09
Supplement: supp [file Figure 3 Supplement 1F.xlsx]

## Sheet: Sheet1
		0mM Pro			0.3mM Pro
	Basal	1	1	1	1	1	1
CHX Washout	0h	0.786322	0.850545	0.726028	0.786322	0.850545	0.726028
	1h	0.80156	0.808002	1.07802	0.872641	0.411045	0.827399
	4h	0.717446	0.794222	1.18219	0.834777	0.542098	1.11152
	8h	0.858127	0.889244	0.813559	1.06778	0.667741	1.15836
	24h	1.12224	0.828405	1.25283	1.14486	0.839601	1.27001
