# Supplementary material for: SLC38A2 provides proline to fulfill unique synthetic demands arising during osteoblast differentiation and bone formation
Source: eLife journal article supplement (doi:10.7554/elife.76963), 2022-03-09
Supplement: supp [file Figure 3D.xlsx]

## Sheet: Sheet1
		0mM Pro			0.3mM Pro
	Basal	1	1	1	1	1	1
CHX Washout	0h	0.00892991	0.192865	0.81401	0.00892991	0.192865	0.81401
	1h	0.0911765	0.026724	0.0783881	0	0	0.0756051
	4h	0.208785	0.123587	0.335319	0.158173	0.549993	0.482588
	8h	0.677828	0.549278	0.862933	1.78938	2.39283	2.64288
	24h	4.35105	5.26826	4.6737	7.95038	8.99542	6.96634
