# Supplementary material for: SLC38A2 provides proline to fulfill unique synthetic demands arising during osteoblast differentiation and bone formation
Source: eLife journal article supplement (doi:10.7554/elife.76963), 2022-03-09
Supplement: supp [file Figure 3E.xlsx]

## Sheet: Sheet1
		0mM Pro			0.3mM Pro
	Basal	1	1	1	1	1	1
CHX Washout	0h	0.262533	0.336369	0.330041	0.262533	0.336369	0.330041
	1h	0.287263	0.274979	0.371637	0.309446	0.307916	0.319015
	4h	0.302543	0.266068	0.480175	0.402663	0.374238	0.485014
	8h	0.371885	0.292197	0.302579	0.445073	0.431579	0.508468
	24h	0.6104	0.493622	0.5443	0.746593	0.748531	0.67123
