# Supplementary material for: SLC38A2 provides proline to fulfill unique synthetic demands arising during osteoblast differentiation and bone formation
Source: eLife journal article supplement (doi:10.7554/elife.76963), 2022-03-09
Supplement: supp [file Figure 3F.xlsx]

## Sheet: Sheet1
		0mM Pro			0.3mM Pro
	Basal	1	1	1	1	1	1
CHX Washout	0h	0.77956	0.764051	0.724645	0.77956	0.764051	0.724645
	1h	0.802167	0.620559	0.671933	0.720532	0.585802	0.559519
	4h	0.750689	0.472936	0.64214	0.70831	0.657243	0.603767
	8h	0.69917	0.424994	0.564897	0.682314	0.610585	0.574957
	24h	0.658945	0.531036	0.476849	0.664785	0.613695	0.489066
