# Supplementary material for: SLC38A2 provides proline to fulfill unique synthetic demands arising during osteoblast differentiation and bone formation
Source: eLife journal article supplement (doi:10.7554/elife.76963), 2022-03-09
Supplement: supp [file Figure 3G.xlsx]

## Sheet: Sheet1
		0mM Pro			0.3mM Pro
	Basal	1	1	1	1	1	1
CHX Washout	0h	0.634605	0.670829	0.609035	0.634605	0.670829	0.609035
	1h	0.566592	0.612236	0.618364	0.588501	0.517577	0.487566
	4h	0.547631	0.545578	0.44225	0.558531	0.538038	0.501282
	8h	0.559159	0.567476	0.503511	0.566814	0.574246	0.50278
	24h	0.71591	0.526736	0.565458	0.764553	0.649768	0.548687
