# Supplementary material for: SLC38A2 provides proline to fulfill unique synthetic demands arising during osteoblast differentiation and bone formation
Source: eLife journal article supplement (doi:10.7554/elife.76963), 2022-03-09
Supplement: supp [file Figure 4 Supplement 1A.xlsx]

## Sheet: Sheet1
Pro		Gln		Ala		Gly		Ser
-	+	-	+	-	+	-	+	-	+	MEAIB
94.4236	26.1596	109.351	86.1449	101.029	69.1824	80.6779	65.0092	70.1523	88.2473
104.869	28.4664	100.035	80.2583	82.6186	129.96	124.756	89.6202	128.882	79.3817
100.707	27.6083	90.6142	103.54	116.352	69.7541	94.5661	104.933	100.966	106.854
