# Supplementary material for: SLC38A2 provides proline to fulfill unique synthetic demands arising during osteoblast differentiation and bone formation
Source: eLife journal article supplement (doi:10.7554/elife.76963), 2022-03-09
Supplement: supp [file Figure 4 Supplement 1C.xlsx]

## Sheet: Sheet1
	sgLuc			sg38a2
Gln	1.11869	0.877454	1.00385	0.624309	0.548518	0.399463
Pro	1.20775	1.00322	0.78903	0.701665	0.644146	0.567164
Ala	1.212	0.924132	0.863863	0.810173	0.923205	0.745245
Gly	1.20122	0.91412	0.884655	0.921686	1.05037	0.893367
Ser	1.10288	0.901613	0.99551	0.98055	1.04608	0.810012
Leu	1.21937	1.0058	0.774838	0.828056	0.801733	0.738287
Asp	1.09492	0.917085	0.987993	1.0419	1.16415	0.817038
Glu	1.21404	0.90888	0.877081	0.922832	1.08586	0.804143
