# Supplementary material for: SLC38A2 provides proline to fulfill unique synthetic demands arising during osteoblast differentiation and bone formation
Source: eLife journal article supplement (doi:10.7554/elife.76963), 2022-03-09
Supplement: supp [file Figure 4 Supplement 1D.xlsx]

## Sheet: Sheet1
sgLuc	sgSlc38a2
29.6399	34.1161
29.1457	34.8044
29.3986	36.0963
