# Supplementary material for: SLC38A2 provides proline to fulfill unique synthetic demands arising during osteoblast differentiation and bone formation
Source: eLife journal article supplement (doi:10.7554/elife.76963), 2022-03-09
Supplement: supp [file Figure 4 Supplement 1E.xlsx]

## Sheet: Sheet1
	sgLuc			sgSlc38a2
Pro	0.98723	1.10491	0.907859	0.659246	0.654135	0.788104
Gln	0.582629	0.976147	1.44122	0.743193	1.30753	0.70392
Glu	0.788719	0.867051	1.34423	1.36047	0.188274	1.06313
Asn	1.12872	0.864983	1.0063	1.22816	0.715708	0.86146
Val	0.79295	0.850673	1.35638	1.072	0.398888	1.0884
