# Supplementary material for: SLC38A2 provides proline to fulfill unique synthetic demands arising during osteoblast differentiation and bone formation
Source: eLife journal article supplement (doi:10.7554/elife.76963), 2022-03-09
Supplement: supp [file Figure 4 Supplement 1G.xlsx]

## Sheet: Sheet1
	sgLuc			sgSlc38a2
Slc38a2	1.22711	0.998715	0.815969	0.408771	0.319661	0.307169
Runx2	0.910372	1.04317	1.053	0.975788	0.994025	0.880135
Col1a1	1.16669	0.963435	0.889658	0.968058	0.738109	0.549451
Sp7	1.04354	0.929951	1.03046	0.952412	0.914182	0.84554
Atf2	1.19265	0.966299	0.867714	0.943747	0.854901	0.881542
Pax1	0.842419	0.945369	1.25566	0.874266	0.950446	0.583488
Rps6	0.956922	1.1431	0.914195	1.12007	0.931779	1.13955
Eif2a	1.21258	1.03856	0.794065	1.00595	0.797431	0.764385
Atf4	1.10981	0.940358	0.958201	0.978081	1.02772	1.02202
Tuba1	1.05594	0.969684	0.976626	0.93327	0.894935	0.931347
Erk2	1.01842	0.93332	1.05206	1.04071	1.05387	1.03032
Smad1	1.09216	0.903359	1.01357	1.03794	1.00245	1.0816
Eef2	1.00947	0.913901	1.08394	0.811767	0.988126	0.902373
4ebp1	1.03766	0.985763	0.977626	0.96635	0.915908	0.941778
Akt1	1.02607	0.873595	1.11561	0.953655	1.03739	0.961213
Phgdh	1.00612	0.95134	1.04476	1.07228	0.947618	0.878699
mTOR	1.00314	0.910525	1.09483	0.942203	1.06788	0.989412
