# Supplementary material for: SLC38A2 provides proline to fulfill unique synthetic demands arising during osteoblast differentiation and bone formation
Source: eLife journal article supplement (doi:10.7554/elife.76963), 2022-03-09
Supplement: supp [file Figure 4 Supplement 1H.xlsx]

## Sheet: Sheet1
sgLuc	sgSlc38a2		S35
93.0766	65.7459
94.6613	74.0374
112.262	73.1816
