# Supplementary material for: SLC38A2 provides proline to fulfill unique synthetic demands arising during osteoblast differentiation and bone formation
Source: eLife journal article supplement (doi:10.7554/elife.76963), 2022-03-09
Supplement: supp [file Figure 4 Supplement 1I.xlsx]

## Sheet: Sheet1
sgLuc	sgSlc38a2		3H-Pro
118.863	37.8199
73.0806	57.4408
108.057	49.763
