# Supplementary material for: SLC38A2 provides proline to fulfill unique synthetic demands arising during osteoblast differentiation and bone formation
Source: eLife journal article supplement (doi:10.7554/elife.76963), 2022-03-09
Supplement: supp [file Figure 4A.xlsx]

## Sheet: Sheet1
Pro		Gln		Ala		Gly		Ser
-	+	-	+	-	+	-	+	-	+	MEAIB
106.261	18.5571	107.325	145.601	90.8922	128.78	104.631	81.8767	99.3894	110.146
94.8769	16.4129	92.6752	80.9742	108.658	134.72	96.3788	79.2827	101.059	113.672
98.8619	16.0589	109.37	104.319	100.45	135.506	98.9903	84.2966	99.5511	118.39
		90.6299	130.184
