# Supplementary material for: SLC38A2 provides proline to fulfill unique synthetic demands arising during osteoblast differentiation and bone formation
Source: eLife journal article supplement (doi:10.7554/elife.76963), 2022-03-09
Supplement: supp [file Figure 4B.xlsx]

## Sheet: Sheet1
sgLuc	sgSlc38a2
90.9715	53.462
114.607	50.75
94.4215	53.7332
107.804	76.984
97.6558	74.6511
94.5401
