# Supplementary material for: SLC38A2 provides proline to fulfill unique synthetic demands arising during osteoblast differentiation and bone formation
Source: eLife journal article supplement (doi:10.7554/elife.76963), 2022-03-09
Supplement: supp [file Figure 5 Supplement 1B.xlsx]

## Sheet: Sheet1
sgLuc	sgSlc38a2
61.3	69.9
56.4	64
61.5	56.5
