# Supplementary material for: SLC38A2 provides proline to fulfill unique synthetic demands arising during osteoblast differentiation and bone formation
Source: eLife journal article supplement (doi:10.7554/elife.76963), 2022-03-09
Supplement: supp [file Figure 5 Supplement 1C.xlsx]

## Sheet: Sheet1
	sgLuc			sgSlc38a2
Slc38a2	83.3784	103.728	112.894	41.9998	44.2512	45.3641
Akp2	118.358	85.9903	95.6522	103.542	98.0418	96.4162
Runx2	143.011	84.135	72.8542	86.0097	96.8449	95.6178
Sp7	121.723	87.9538	90.3229	40.5552	35.0659	41.7796
Bglap	124.979	82.803	92.2178	12.9018	13.2368	8.74278
Ibsp	119.608	76.9997	103.393	13.6881	9.3619	12.798
