# Supplementary material for: SLC38A2 provides proline to fulfill unique synthetic demands arising during osteoblast differentiation and bone formation
Source: eLife journal article supplement (doi:10.7554/elife.76963), 2022-03-09
Supplement: supp [file Figure 5 Supplement 3B.xlsx]

## Sheet: Sheet1
	Sp7Cre;38a2fl/+						Sp7Cre;38a2fl/fl
Pro	95.9662	101.425	102.609	100	100		60.7005	61.4251		47.0062	56.1798	50.0208
Gln	100	100		100	86.5239	113.476	88.1633	74.3997	108.686	86.4797	61.2589	87.6055
Ala	95.0099	104.99	90.8168	108.953	100.231		47.364	112.32	92.0628	107.845	100.231
Ser	70.8195	116.271	102.713	110.197	100		121.556	104.982			73.3504	98.1749
Gly	134.649	61.9355	68.6654	134.75	100		73.5737	82.9348			102.422	100.161
Glu	100	124.874	75.1256	116.239	96.0183		49.0689	80.9045	83.9196	126.701	115.925
