# Supplementary material for: SLC38A2 provides proline to fulfill unique synthetic demands arising during osteoblast differentiation and bone formation
Source: eLife journal article supplement (doi:10.7554/elife.76963), 2022-03-09
Supplement: supp [file Isotopomer analysis.xlsx]

## Sheet: 24h tracing_Fig2A
Fractional Enrichment
	unlabeled 1	unlabeled 2	unlabeled 3	Glutamine 1	Glutamine 2	Glutamine 3	Glucose 1	Glucose 2	Glucose 3	Proline 1	Proline 2	Proline 3
Pyruvate M+0	1	1	1	0.990268	0.978029	0.98665	0.870516	0.876819	0.886914	0.996937	1	0.999367
Pyruvate M+1	0	0	0	0.00242746	0	0	0.0256082	0.0275657	0.0321654	0.00306305	0	0
Pyruvate M+2	0	0	0	0	0	0	0.0951143	0.0912041	0.0809211	0	0	0
Pyruvate M+3	0	0	0	0.00730414	0.0219711	0.0133501	0.00876115	0.00441131	0	0	0	0.000633011
Lactate M+0	0.997139	1	1	0.995294	0.993205	0.992178	0.89594	0.890525	0.896727	1	1	1
Lactate M+1	0	0	0	0	0	0	0.0208061	0.0168684	0.00989409	0	0	0
Lactate M+2	0	0	0	0	0	0	0.0776391	0.0796865	0.0846993	0	0	0
Lactate M+3	0.00286076	0	0	0.00470582	0.00679458	0.00782156	0.00561485	0.0129201	0.00867919	0	0	0
Alanine M+0	1	1	1	0.99527	0.99589	0.994716	0.954681	0.959743	0.961112	1	1	1
Alanine M+1	0	0	0	0	0	0	0.00917896	0.00785153	0.00564314	0	0	0
Alanine M+2	0	0	0	0	0	0	0.0331694	0.0298757	0.0302055	0	0	0
Alanine M+3	0	0	0	0.00472952	0.00411039	0.00528397	0.00297022	0.00252939	0.0030397	0	0	0
Glycine M+0	1	1	1	1	1	1	0.988798	0.989633	0.986912	1	1	1
Glycine M+1	0	0	0	0	0	0	0.0112018	0.0103673	0.0130883	0	0	0
Glycine M+2	0	0	0	0	0	0	0	0	0	0	0	0
Serine M+0	1	1	1	1	1	1	0.909225	0.92307	0.923812	1	1	1
Serine M+1	0	0	0	0	0	0	0.040166	0.0340455	0.0279239	0	0	0
Serine M+2	0	0	0	0	0	0	0.0493909	0.0425757	0.0437352	0	0	0
Serine M+3	0	0	0	0	0	0	0.00121805	0.000308387	0.00452897	0	0	0
Malate M+0	1	1	1	0.699377	0.673676	0.687199	0.965529	0.994897	0.99236	1	1	1
Malate M+1	0	0	0	0.0515613	0.0631658	0.0582407	0.0344711	0	0.0076395	0	0	0
Malate M+2	0	0	0	0.0722628	0.0481958	0.0712292	0	0	0	0	0	0
Malate M+3	0	0	0	0.0436701	0.0655905	0.0490606	0	0.00510296	0	0	0	0
Malate M+4	0	0	0	0.133129	0.149372	0.134271	0	0	0	0	0	0
Aspartate M+0	1	1	1	0.757029	0.741961	0.753148	0.9911	0.999449	0.991581	1	1	1
Aspartate M+1	0	0	0	0.0372776	0.0570791	0.0463215	0.0089003	0.000551395	0.00841886	0	0	0
Aspartate M+2	0	0	0	0.048187	0.0399606	0.0461923	0	0	0	0	0	0
Aspartate M+3	0	0	0	0.055074	0.0469198	0.0438943	0	0	0	0	0	0
Aspartate M+4	0	0	0	0.102432	0.11408	0.110444	0	0	0	0	0	0
Glutamate M+0	1	1	1	0.607896	0.592774	0.601289	0.981263	0.980248	0.981189	0.999689	0.999698	0.999415
Glutamate M+1	0	0	0	0.0509646	0.0485149	0.0503958	0.0187371	0.0197523	0.0188107	0	0	0
Glutamate M+2	0	0	0	0.0219672	0.0232839	0.023096	0	0	0	0	0	0
Glutamate M+3	0	0	0	0.0716825	0.0748832	0.0726753	0	0	0	0	0	0
Glutamate M+4	0	0	0	0.0103363	0.0106617	0.00989377	0	0	0	0	0	0
Glutamate M+5	0	0	0	0.237154	0.249882	0.24265	0	0	0	0.000310705	0.000302277	0.00058502
Citrate M+0	0.996003	0.998377	0.997526	0.746951	0.725564	0.750787	0.939959	0.950556	0.946322	0.996855	0.998103	0.998281
Citrate M+1	0	0	0	0.053626	0.0670953	0.0493538	0.0228284	0.0156861	0.0151105	0	0	0
Citrate M+2	0	0	0	0.0350053	0.041981	0.0405836	0.0316127	0.0283178	0.0362642	0	0	0
Citrate M+3	0	0	0	0.0552719	0.0454055	0.0443279	0	0.00149404	0	0	0	0
Citrate M+4	0	0.000119094	0	0.0820562	0.0884752	0.0835865	0.00297222	0.00288677	0.00134583	0	0	0
Citrate M+5	0.000244836	0.000498509	0	0.0236001	0.031414	0.031361	0.00229607	0.000935546	0	6.4229e-06	0	0.000374118
Citrate M+6	0.00375198	0.00100537	0.00247375	0.00348995	6.51758e-05	0	0.000331484	0.000123841	0.0009574	0.00313875	0.00189726	0.00134463
Succinate M+0	0.98161	0.98948	0.976456	0.730103	0.681585	0.703983	0.97266	0.989605	0.954419	0.995873	0.98389	0.981547
Succinate M+1	0.01229	0.00900411	0.0184151	0.0685186	0.0649772	0.0580895	0.0273162	0	0.0342922	0	0.0155825	0.00245647
Succinate M+2	0	0	0	0.0525881	0.0521419	0.070138	2.3433e-05	0.00803219	0.00985012	0	0	0.00639085
Succinate M+3	0	0	0	0	0.0175846	0.00452146	0	0.00223013	0	0	0	0
Succinate M+4	0.00610042	0.00151601	0.00512929	0.14879	0.183711	0.163268	0	0.000132304	0.00143864	0.00412712	0.000526977	0.00960596
Fumarate M+0	0.864844	0.908795	0.889791	0.655061	0.656751	0.654895	0.873028	0.83737	0.839237	0.887526	0.897081	0.934537
Fumarate M+1	0.06441	0.0455163	0.0538565	0.0986577	0.0874428	0.0877694	0.0626673	0.0835617	0.0818819	0.0638299	0.0438599	0.033494
Fumarate M+2	0	0	0	0.034366	0.0407863	0.0400366	0	0.0126612	0	0	0	0
Fumarate M+3	0	0	0	0.0559661	0.0276534	0.0371993	0.012351	0.00889004	0	0	0.00587296	0
Fumarate M+4	0.070746	0.0456889	0.0563525	0.15595	0.187366	0.1801	0.0519533	0.0575175	0.0788808	0.0486437	0.053186	0.0319689
Alpha-Ketoglutarate M+0	0.99805	0.988974	0.997308	0.588451	0.581068	0.581704	0.974617	0.970125	0.973287	0.996749	0.996908	0.99775
Alpha-Ketoglutarate M+1	0	0.0110257	0.00269241	0.0771956	0.0566489	0.0760695	0.0253488	0.0282336	0.0214392	0	0	0
Alpha-Ketoglutarate M+2	0	0	0	0.0299926	0.0227629	0.0283902	0	0	0	0	0	0
Alpha-Ketoglutarate M+3	0	0	0	0.072144	0.077495	0.0706196	0	0.00153045	0.000452362	0	0	0
Alpha-Ketoglutarate M+4	0	0	0	0.0132357	0.00561139	0.00761886	0	0	0.00482178	0	0	0
Alpha-Ketoglutarate M+5	0.00194951	0	0	0.218981	0.256414	0.235598	3.42953e-05	0.000110666	0	0.00325084	0.00309165	0.00225014
Glutamine M+0	1	1	1	0.100976	0.0967585	0.0886827	1	1	1	1	1	1
Glutamine M+1	0	0	0	0	0	0.000703515	0	0	0	0	0	0
Glutamine M+2	0	0	0	0	0.00376701	0.00371898	0	0	0	0	0	0
Glutamine M+3	0	0	0	0.0065512	0.00287515	0.00438589	0	0	0	0	0	0
Glutamine M+4	0	0	0	0.0334352	0.0312576	0.0357314	0	0	0	0	0	0
Glutamine M+5	0	0	0	0.859038	0.865342	0.866778	0	0	0	0	0	0
Valine M+0	1	1	1	1	0.99989	1	0.999318	1	1	1	1	1
Valine M+1	0	0	0	0	3.96937e-05	0	0	0	0	0	0	0
Valine M+2	0	0	0	0	0	0	0	0	0	0	0	0
Valine M+3	0	0	0	0	0	0	0	0	0	0	0	0
Valine M+4	0	0	0	0	0	0	0	0	0	0	0	0
Valine M+5	0	0	0	0	7.06821e-05	0	0.000681841	0	0	0	0	0
Leucine M+0	0.995539	0.997726	0.997788	0.998316	0.996804	0.995069	0.993994	0.992887	0.992543	0.99222	0.998046	0.99648
Leucine M+1	0	0	0	0	0.00130779	0.00463267	0	0.000888784	0	0	0	0
Leucine M+2	0	0	0	0	0	0	0	0	0	0	0	0
Leucine M+3	0.00209094	0	0	0	0	0	0.00195431	0.000550874	0.00160748	0.00465702	0	0
Leucine M+4	0	0	0	0	0	0	0	0	0	0	0	0
Leucine M+5	0.00237009	0.00227406	0.00221162	0.00137336	0.00188833	0.000298711	0.00405197	0.00545696	0.00584947	0.00306921	0.00195402	0.00322477
Leucine M+6	0	0	0	0.000310539	0	0	0	0.00021595	0	5.42156e-05	0	0.000295642
Isoleucine M+0	1	1	1	1	1	1	1	1	1	1	1	1
Isoleucine M+1	0	0	0	0	0	0	0	0	0	0	0	0
Isoleucine M+2	0	0	0	0	0	0	0	0	0	0	0	0
Isoleucine M+3	0	0	0	0	0	0	0	0	0	0	0	0
Isoleucine M+4	0	0	0	0	0	0	0	0	0	0	0	0
Isoleucine M+5	0	0	0	0	0	0	0	0	0	0	0	0
Isoleucine M+6	0	0	0	0	0	0	0	0	0	0	0	0
Proline M+0	0.998947	0.996481	0.998288	0.908834	0.896768	0.897548	0.993807	0.993111	0.994611	0.613235	0.595974	0.600247
Proline M+1	0	0	0	0	0	0	0	0	0	0	0	0
Proline M+2	0	0	0	0	0	0	0	0	0	0	0	0
Proline M+3	0	0	0	0.0173338	0.0221486	0.0218064	0	0	0	0	0	0
Proline M+4	0	0	0	0.00239919	0.00485949	0.00370083	0.00154615	0.00310536	0.000315071	0.0200653	0.0194126	0.0172611
Proline M+5	0.00105268	0.00351914	0.00171219	0.0714331	0.0762242	0.0769452	0.00464688	0.00378346	0.00507436	0.366699	0.384614	0.382492
Pyroglutamate M+0	0.937319	0.944676	0.948721	0.272765	0.23155	0.236405	0.97379	0.978685	0.97537	0.963271	0.969081	0.967236
Pyroglutamate M+1	0	0	0	0.0170125	0.01423	0.0135246	0	0.000731836	0	0	0	0
Pyroglutamate M+2	0	0	0	0.000894798	0.00254777	0.00335147	0	0	0	0	0	0
Pyroglutamate M+3	0	0	0	0.0228828	0.0214814	0.0207888	0	0	0	0	0	0
Pyroglutamate M+4	0.00214137	0	0.000442419	0.028357	0.0315317	0.0314269	0	0	0	0	0	0
Pyroglutamate M+5	0.0605398	0.0553236	0.0508363	0.658087	0.698659	0.694503	0.0262105	0.020583	0.0246296	0.0367295	0.0309188	0.0327642
Threonine M+0	0.987163	1	1	1	1	1	1	1	1	1	1	1
Threonine M+1	0.012837	0	0	0	0	0	0	0	0	0	0	0
Threonine M+2	0	0	0	0	0	0	0	0	0	0	0	0
Threonine M+3	0	0	0	0	0	0	0	0	0	0	0	0
Threonine M+4	0	0	0	0	0	0	0	0	0	0	0	0
Phenylalanine M+0	0.944768	0.937815	0.947512	0.950848	0.944154	0.946535	0.908518	0.899507	0.890704	0.917126	0.909974	0.912605
Phenylalanine M+1	0	0	0	0	0	0	0	0	0	0	0	0
Phenylalanine M+2	0	0	0	0	0	0	0	0	0	0	0	0
Phenylalanine M+3	0	0	0	0	0	0	0	0	0	0	0	0
Phenylalanine M+4	0.000302191	0	0	0	0	0	0	0.00173417	0	0	0.00100935	0
Phenylalanine M+5	0.0178501	0.0245647	0.0219356	0.0243962	0.0173281	0.0265911	0.0317756	0.0283513	0.0339511	0.0255497	0.0297936	0.0281153
Phenylalanine M+6	0.00528538	0.0065603	0.00860416	0.00610219	0.00428083	0.00571351	0.0131421	0.0133142	0.00856397	0.0107918	0.00851115	0.00739046
Phenylalanine M+7	0.0115822	0.011521	0.00355206	0.00568986	0.00373113	0.00567657	0.00438656	0.00805715	0.0110142	0.00725094	0.00783662	0.00564321
Phenylalanine M+8	0.0113202	0.0121642	0.0138167	0.00601749	0.0224646	0.00983749	0.0349089	0.0377126	0.0424757	0.0298062	0.0341825	0.0350372
Phenylalanine M+9	0.0088918	0.0073746	0.00457987	0.00694647	0.00804089	0.00564639	0.00726885	0.0113235	0.0132914	0.00947508	0.00869244	0.0112088
Cysteine M+0	0.946708	0.99426	0.971228	0.972713	0.952658	0.953106	0.961842	0.951265	0.96461	0.972264	0.975437	0.984749
Cysteine M+1	0.0412751	0	0.0195623	0.0162361	0.000796021	0.0159461	0.0106451	0.0371238	0.00336775	0.0138726	0.00082264	0
Cysteine M+2	0.00535458	0.00574033	0.00357727	0	0.00166472	0	0.00895393	0	0.0176266	0	0.00899604	0.007523
Cysteine M+3	0.00666187	0	0.00563276	0.0110506	0.0448817	0.0309479	0.0185592	0.0116116	0.0143955	0.0138631	0.0147439	0.00772845
Asparagine M+0	1	1	1	0.922792	0.981962	0.935468	0.986403	1	1	0.994293	1	1
Asparagine M+1	0	0	0	0.0597299	0.00967367	0.0478236	0.0135968	0	0	0.00570661	0	0
Asparagine M+2	0	0	0	0	0	0	0	0	0	0	0	0
Asparagine M+3	0	0	0	0	0	0	0	0	0	0	0	0
Asparagine M+4	0	0	0	0.0174777	0.0083648	0.0167083	0	0	0	0	0	0
Tyrosine M+0	0.976857	0.985533	0.982323	0.979419	0.984647	0.987759	0.98307	0.986758	0.986888	0.988943	0.985007	0.988469
Tyrosine M+1	0.00177694	0	0	0	0	0	0	0	0	0	0	0
Tyrosine M+2	0	0	0	0	0	0	0	0	0	0	0	0
Tyrosine M+3	0	0	0	0	0	0	0	0	0	0	0	0
Tyrosine M+4	0.000956843	0.00117667	0.00033452	0	0	0	0	0	0.000376614	0	0.00280853	0.00161532
Tyrosine M+5	0.0134177	0.00841233	0.0113977	0.0167813	0.00729927	0.00750066	0.0102094	0.00530384	0.00231143	0.00757132	0.0029918	0.00410753
Tyrosine M+6	0.00128108	0	0.0023909	0	0	0	0	0.00014236	0.00394552	0.000624457	0.000762633	0.00118751
Tyrosine M+7	0.00197476	0.000756595	0	0	0.00126298	0.00143243	0.00222988	0.00211406	0.00288185	0	0.00109895	0.000377173
Tyrosine M+8	8.77269e-05	0	0.000489425	0.000793652	0	1.63589e-05	0	0.000706996	0	0	0.00144072	0
Tyrosine M+9	0.00364756	0.00412154	0.0030641	0.00300606	0.00679109	0.00329191	0.00449079	0.00497453	0.00359694	0.00286137	0.00589069	0.00424355
Methionine M+0	0.97248	0.971799	0.981383	0.986548	0.96256	0.984435	0.987706	0.96955	0.960124	0.985197	0.968159	0.979885
Methionine M+1	0.00414628	0	0	0	0.0193366	0	0	0	0.0317956	0	0.0147821	0.00819901
Methionine M+2	0.00240581	0	0.00445879	0	0.0135108	0	0	0.0111356	0.00114752	0	0.00738602	0.0105213
Methionine M+3	0.0174958	0.0206821	0.00865572	0.00840453	0	0.00703045	0.00373846	0.0193142	0.0016189	0.0110868	0.00918823	0.00139505
Methionine M+4	0.00347199	0.00751899	0.00550214	0.00504727	0.00459228	0.00853466	0.00855551	0	0.00531377	0.0037157	0.000484252	0

## Sheet: 72h tracing_Fig2A
Fractional Enrichment
	unlabeled 1	unlabeled 2	unlabeled 3	Glucose 1	Glucose 2	Glucose 3	Proline 1	Proline 2	Proline 3	Glutamine 1	Glutamine 2	Glutamine 3
Pyruvate M+0	0.99903	0.988084	0.919953	0.706983	0.690584	0.696091	0.991424	0.986052	0.971054	0.954374	0.959656	0.95889
Pyruvate M+1	0	0.0111968	0.0608881	0.0476814	0.0547118	0.0543096	0.00703555	0.0115438	0.0222953	0.0303936	0.0241476	0.0245519
Pyruvate M+2	0	0	0.0191589	0.239203	0.247816	0.242978	0	0	0.006029	0	0	0
Pyruvate M+3	0.000969695	0.000718994	0	0.00613278	0.00688766	0.00662092	0.00154071	0.0024046	0.000621265	0.0152322	0.0161968	0.0165577
Lactate M+0	1	1	1	0.683629	0.695828	0.678386	1	1	1	0.988376	0.988729	0.992507
Lactate M+1	0	0	0	0.0277076	0.0269443	0.0187738	0	0	0	0.00702706	0.00605333	0.00285415
Lactate M+2	0	0	0	0.285716	0.271977	0.297146	0	0	0	0	0	0
Lactate M+3	0	0	0	0.00294756	0.00525089	0.00569437	0	0	0	0.00459712	0.00521804	0.00463884
Alanine M+0	1	1	1	0.830277	0.82723	0.827072	1	1	1	0.985541	0.985879	0.986381
Alanine M+1	0	0	0	0.0122382	0.0117923	0.0143493	0	0	0	0	0	0
Alanine M+2	0	0	0	0.15156	0.153479	0.151451	0	0	0	0	0	0
Alanine M+3	0	0	0	0.00592463	0.00749815	0.00712761	0	0	0	0.0144588	0.0141215	0.0136187
Glycine M+0	1	1	1	0.94638	0.944581	0.946566	1	1	1	1	1	1
Glycine M+1	0	0	0	0.0536196	0.0554191	0.0534338	0	0	0	0	0	0
Glycine M+2	0	0	0	0	0	0	0	0	0	0	0	0
Serine M+0	1	1	1	0.770851	0.764515	0.769668	1	1	1	1	1	1
Serine M+1	0	0	0	0.0833052	0.0824094	0.0856576	0	0	0	0	0	0
Serine M+2	0	0	0	0.139912	0.149022	0.142969	0	0	0	0	0	0
Serine M+3	0	0	0	0.00593094	0.00405359	0.00170473	0	0	0	0	0	0
Malate M+0	1	1	1	0.878474	0.87069	0.874291	1	1	1	0.696231	0.693145	0.713823
Malate M+1	0	0	0	0.0691806	0.0705105	0.0645287	0	0	0	0.102468	0.10261	0.0835844
Malate M+2	0	0	0	0.0462128	0.0495144	0.0540296	0	0	0	0.0568479	0.0603512	0.0615379
Malate M+3	0	0	0	0.00613279	0.0075228	0.00715115	0	0	0	0.0321561	0.0348612	0.02935
Malate M+4	0	0	0	0	0.00176236	0	0	0	0	0.112297	0.109032	0.111705
Aspartate M+0	0.999554	0.997571	0.994409	0.857968	0.850176	0.852861	1	0.99531	0.994373	0.73276	0.733019	0.746671
Aspartate M+1	0	0	0	0.0719755	0.0788279	0.0789571	0	0	0	0.0970955	0.0908736	0.0796022
Aspartate M+2	0	0	0	0.0482512	0.0513347	0.0494613	0	0	0	0.0441576	0.0443753	0.0421875
Aspartate M+3	0.000445772	0.00242932	0.00559072	0.0218048	0.0193609	0.0187202	0	0.00316823	0.00552499	0.0428104	0.042765	0.0434953
Aspartate M+4	0	0	0	0	0.000300362	0	0	0.00152146	0.000102272	0.0831761	0.088967	0.0880439
Glutamate M+0	1	1	1	0.843302	0.839761	0.835416	0.998163	0.998204	0.997976	0.641317	0.633963	0.63197
Glutamate M+1	0	0	0	0.0662008	0.0683062	0.0717725	0	0	0	0.0811563	0.0792497	0.0787924
Glutamate M+2	0	0	0	0.0806219	0.0819531	0.0829313	0	0	0	0.0335439	0.0339037	0.0340539
Glutamate M+3	0	0	0	0.00809676	0.00802538	0.00793216	0	0	0	0.0689099	0.0690511	0.068905
Glutamate M+4	0	0	0	0.00177901	0.00195407	0.00192888	0	0	0	0.00813759	0.00887667	0.0091808
Glutamate M+5	0	0	0	0	0	1.92618e-05	0.00183741	0.00179578	0.00202365	0.166935	0.174956	0.177098
Citrate M+0	0.974818	0.97958	0.983669	0.708663	0.709265	0.731552	0.973641	0.974377	0.976058	0.688619	0.688154	0.693207
Citrate M+1	0	0	0	0.0899509	0.0926962	0.0795678	0	0	0	0.0985429	0.0951762	0.0910915
Citrate M+2	0	0	0	0.152157	0.152057	0.143957	0	0	0	0.0660114	0.0695424	0.0674204
Citrate M+3	0	0	0	0.0179069	0.0179775	0.0182361	0	0	0	0.0361283	0.0395407	0.0403812
Citrate M+4	0.0128567	0.00946417	0.0085482	0.0185448	0.0201572	0.0174319	0.0144366	0.0124568	0.0140476	0.081502	0.0816439	0.0835083
Citrate M+5	0.00177124	0.00313202	0.00151328	0.0062349	0.00320026	0.00266644	0.00332067	0.00359474	0.00215571	0.0186016	0.0198171	0.0193542
Citrate M+6	0.0105541	0.00782413	0.00626972	0.00654331	0.0046468	0.00658867	0.00860177	0.00957146	0.00773878	0.010595	0.00612536	0.00503718
Succinate M+0	0.850889	0.775773	0.742726	0.783993	0.765068	0.677878	0.90448	0.874691	0.853415	0.659846	0.704852	0.679078
Succinate M+1	0.149111	0.220918	0.235796	0.16067	0.181924	0.259571	0.0955201	0.123018	0.146585	0.169943	0.154861	0.173742
Succinate M+2	0	0.00245437	0.0214774	0.0552806	0.0486296	0.0579418	0	0	0	0.0595723	0.0358477	0.0521324
Succinate M+3	0	0	0	0	0.00437879	0.00433458	0	0	0	0	0	0
Succinate M+4	0	0.000854546	0	5.64694e-05	0	0.000274024	0	0.00229103	0	0.110638	0.104439	0.095048
Fumarate M+0	0.824968	0.801104	0.794483	0.639169	0.622609	0.622528	0.742303	0.683424	0.690404	0.624947	0.61461	0.586677
Fumarate M+1	0.100403	0.106415	0.113457	0.170722	0.184091	0.197263	0.0933975	0.125474	0.115212	0.158723	0.158842	0.172246
Fumarate M+2	0.0159735	0.0300702	0.032511	0.122321	0.117307	0.107925	0.0382865	0.0474305	0.0432474	0.0869132	0.0914358	0.0998968
Fumarate M+3	0.0586557	0.0606551	0.0589978	0.0677879	0.0759934	0.072285	0.0485056	0.051952	0.0563525	0.0597447	0.0611914	0.0637567
Fumarate M+4	0	0.00175545	0.000550565	0	0	0	0.077507	0.0917196	0.0947842	0.0696716	0.0739206	0.0774231
Alpha-Ketoglutarate M+0	0.988943	0.98784	0.987479	0.810468	0.805791	0.814228	0.982898	0.972085	0.973538	0.631311	0.625308	0.615608
Alpha-Ketoglutarate M+1	0	0	0	0.0719726	0.072535	0.0704493	0	0	0.00172415	0.0955038	0.0857694	0.0968827
Alpha-Ketoglutarate M+2	0	0	0	0.0714898	0.0782631	0.0725904	0	0	0	0.0332336	0.0383125	0.0320039
Alpha-Ketoglutarate M+3	0.00176715	0.0033189	0.0046555	0.0306116	0.0264915	0.0262944	0.00653345	0.0125809	0.0102956	0.0698012	0.0739226	0.0765247
Alpha-Ketoglutarate M+4	0	0	0	0.0031726	0.00388569	0.00337538	0	0	0	0.00835529	0.00941131	0.00961689
Alpha-Ketoglutarate M+5	0.00928966	0.00884128	0.00786522	0.0122852	0.0130335	0.0130622	0.0105685	0.015334	0.0144422	0.161795	0.167276	0.169364
Glutamine M+0	0.903685	0.854287	0.873929	0.828575	0.865704	0.814666	0.914369	0.866784	0.875236	0.264035	0.222411	0.262507
Glutamine M+1	0.0963153	0.145713	0.126071	0.129505	0.103465	0.141789	0.0856313	0.133216	0.124764	0.140919	0.128152	0.113427
Glutamine M+2	0	0	0	0.0196492	0.0107847	0.0133854	0	0	0	0.0327323	0.0307953	0.027603
Glutamine M+3	0	0	0	0.0216493	0.0178009	0.0236785	0	0	0	0.0166945	0.0129493	0.0112071
Glutamine M+4	0	0	0	0.000621798	0.00224554	0.0064806	0	0	0	0.0111488	0.0116203	0.0149025
Glutamine M+5	0	0	0	0	0	0	0	0	0	0.534471	0.594072	0.570353
Valine M+0	1	1	1	1	1	1	1	1	1	1	1	1
Valine M+1	0	0	0	0	0	0	0	0	0	0	0	0
Valine M+2	0	0	0	0	0	0	0	0	0	0	0	0
Valine M+3	0	0	0	0	0	0	0	0	0	0	0	0
Valine M+4	0	0	0	0	0	0	0	0	0	0	0	0
Valine M+5	0	0	0	0	0	0	0	0	0	0	0	0
Leucine M+0	0.997913	0.996709	0.996659	0.996806	0.993586	0.996369	0.997354	0.995639	0.996289	0.998892	0.99926	0.998373
Leucine M+1	0	0	0.0001387	0	0	0	0	0	0	0	0	0
Leucine M+2	0	0	0	0	0	0	0	0	0	0	0	0
Leucine M+3	0.00158381	0.00286642	0.00268897	0.00214332	0.00592112	0.00297776	0.00172817	0.0031077	0.00316578	0	0	0.000268781
Leucine M+4	0	0	0	0	0	0	0	0.000288094	0	0	0	0
Leucine M+5	0.000257403	0.000424823	0.000513093	0.00105064	0.000492924	0.000652825	0.000917824	0.000964761	0.000545009	0.000706783	0.000740233	0.00135786
Leucine M+6	0.000246182	0	0	0	0	0	0	0	0	0.0004014	0	0
Isoleucine M+0	0.999416	0.999839	1	0.998921	0.999108	0.998663	0.999645	0.999114	0.9994	0.999154	0.998952	0.999477
Isoleucine M+1	0	0	0	0	0	0	0	0	0	0	0	0
Isoleucine M+2	0	0	0	0	0	0	0	0	0	0	0	0
Isoleucine M+3	0	0	0	0	0	0	0	0	0	0	0	0
Isoleucine M+4	0	0	0	0	0	0	0	0	0	0	0	0
Isoleucine M+5	0	0	0	0.000478127	0	0.000179081	0	0.000196679	0	0	0	0
Isoleucine M+6	0.000584278	0.000161274	0	0.000600786	0.000892022	0.00115756	0.00035535	0.000689772	0.000600203	0.000845787	0.00104846	0.000523279
Proline M+0	0.955729	0.963463	0.961712	0.890242	0.912058	0.922608	0.321323	0.318464	0.321343	0.823293	0.830147	0.828839
Proline M+1	0	0	0	0.0206604	0.0196401	0.017437	0	0.0015277	0	0.0295367	0.0228898	0.0228019
Proline M+2	0	0	0	0.00289834	0.0062881	0.00351557	0	0	0	0	0	0
Proline M+3	0.0282896	0.01734	0.0187233	0.0482891	0.0318587	0.0291767	0.0283236	0.0262543	0.0156175	0.0468313	0.0524321	0.0534843
Proline M+4	0.0100658	0.0122952	0.0128618	0.0218888	0.0198156	0.0183109	0	0	0	0.0124734	0.010798	0.0123332
Proline M+5	0.0059159	0.00690194	0.00670318	0.0160214	0.0103395	0.0089518	0.650353	0.653754	0.663039	0.0878659	0.0837335	0.0825415
Pyroglutamate M+0	0.999487	0.999386	0.999355	0.990927	0.986426	0.98633	0.998439	0.998285	0.99834	0.273616	0.272043	0.278676
Pyroglutamate M+1	0	0	0	0.00623343	0.0102121	0.0106746	0	0	0	0.0205714	0.0209006	0.0197917
Pyroglutamate M+2	0	0	0	0	0	0	0	0	0	0.00645813	0.00695015	0.00617839
Pyroglutamate M+3	0	0	0	0.00121572	0.00157562	0.00108654	0	0	0	0.0212784	0.0220908	0.023157
Pyroglutamate M+4	0	0	0	0	0	0.000322789	0	0	0	0	0	0
Pyroglutamate M+5	0.000513185	0.000613618	0.000644998	0.00162372	0.00178657	0.00158598	0.00156135	0.00171478	0.00166038	0.678076	0.678016	0.672197
Threonine M+0	1	0.999091	0.998517	0.999764	0.994664	0.987801	1	1	1	1	1	0.997746
Threonine M+1	0	0.000909097	0.00148305	0.000235751	0.00533595	0.0121987	0	0	0	0	0	0.00225359
Threonine M+2	0	0	0	0	0	0	0	0	0	0	0	0
Threonine M+3	0	0	0	0	0	0	0	0	0	0	0	0
Threonine M+4	0	0	0	0	0	0	0	0	0	0	0	0
Phenylalanine M+0	0.966465	0.965202	0.964918	0.947776	0.968416	0.969287	0.957551	0.937608	0.955901	0.972246	0.956029	0.963258
Phenylalanine M+1	0.0150061	0.00533544	0.0102968	0.0230772	0.00801987	0.00433225	0.021764	0.0326902	0.0200413	0.0085396	0.0191508	0.00824943
Phenylalanine M+2	0	0	0	0	0	0	0	0	0	0	0	0
Phenylalanine M+3	0.00946518	0.0173888	0.0129221	0.0177753	0.0145826	0.0148216	0.00789615	0.0125842	0.0105433	0.0094698	0.0161931	0.0195782
Phenylalanine M+4	0.00906377	0.0120736	0.0118633	0.0113711	0.00898194	0.0115596	0.012789	0.0171179	0.0135145	0.00974453	0.00862665	0.00891424
Phenylalanine M+5	0	0	0	0	0	0	0	0	0	0	0	0
Phenylalanine M+6	0	0	0	0	0	0	0	0	0	0	0	0
Phenylalanine M+7	0	0	0	0	0	0	0	0	0	0	0	0
Phenylalanine M+8	0	0	0	0	0	0	0	0	0	0	0	0
Phenylalanine M+9	0	0	0	0	0	0	0	0	0	0	0	0
Cysteine M+0	0.863417	0.8535	0.859689	0.80327	0.826138	0.848611	0.892615	0.853458	0.865184	0.877062	0.884892	0.873477
Cysteine M+1	0.050357	0.0581673	0.060903	0.0862128	0.0729164	0.0589063	0.0264652	0.0513881	0.0491135	0.0651993	0.0572429	0.0651802
Cysteine M+2	0.00119565	0	0	0	0	0.00746811	0.00408411	0	0.00487671	0.00488681	0.00738793	0.00103383
Cysteine M+3	0.0850308	0.0883326	0.0794078	0.110517	0.100946	0.0850146	0.076836	0.095154	0.0808257	0.0528524	0.0504776	0.0603089
Asparagine M+0	0.987484	0.980951	0.984434	0.919464	0.893272	0.927239	0.985272	0.971491	0.98134	0.940934	0.931497	0.919815
Asparagine M+1	0.0125162	0.0190486	0.0155659	0.080536	0.106728	0.0727615	0.014728	0.0285094	0.0186601	0.0583022	0.0679791	0.0801851
Asparagine M+2	0	0	0	0	0	0	0	0	0	0	0	0
Asparagine M+3	0	0	0	0	0	0	0	0	0	0.000764158	0.00052343	0
Asparagine M+4	0	0	0	0	0	0	0	0	0	0	0	0
Tyrosine M+0	0.934123	0.941454	0.967573	0.961713	0.959178	0.969011	0.944792	0.941804	0.942807	0.942389	0.940912	0.932889
Tyrosine M+1	0.0143455	0.0281944	0.00464032	0.0120362	0.0187793	0.0117062	0.0119316	0.00513567	0.0203439	0.0124915	0.0128272	0.0310641
Tyrosine M+2	0	0	0	0	0	0	0	0	0	0	0	0
Tyrosine M+3	0.0162821	0.0107653	0.00726183	0.00643868	0.00424138	0.00880578	0.0232191	0.0180814	0.0144328	0.02734	0.0259629	0.0146048
Tyrosine M+4	0.0189494	0.019586	0.020525	0.00850756	0.00531434	0.0077493	0.0200569	0.0189374	0.0177735	0.0105165	0.0129024	0.0176321
Tyrosine M+5	0	0	0	0	0	0	0	0	0	0	0	0
Tyrosine M+6	0.0162999	0	0	0.0113046	0.0124865	0.002728	0	0.0160419	0.00464289	0.00726289	0.00739554	0.00380992
Tyrosine M+7	0	0	0	0	0	0	0	0	0	0	0	0
Tyrosine M+8	0	0	0	0	0	0	0	0	0	0	0	0
Tyrosine M+9	0	0	0	0	0	0	0	0	0	0	0	0
Methionine M+0	0.950447	0.877694	0.818986	0.922158	0.847352	0.923507	0.94518	0.933079	0.942715	0.9643	0.953598	0.955093
Methionine M+1	0.0131786	0.0376055	0.106912	0.022854	0.0783531	0.0260665	0.0110433	0.0256303	0.0157384	0.0119375	0.0112073	0.0173969
Methionine M+2	0.010218	0.0752111	0.0506157	0.0229186	0.0423288	0.0184197	0.0146168	0.00891857	0.0188033	0.00665582	0.0157804	0
Methionine M+3	0.0115629	0	0.00397363	0.0140917	0.00770507	0.0190317	0.013732	0.0128901	0.0137517	0.00681681	0.00980688	0.0135173
Methionine M+4	0.0145937	0.00948898	0.0195122	0.0179781	0.024261	0.0129748	0.0154277	0.0194817	0.00899136	0.0102901	0.00960698	0.0139932

## Sheet: 13CPro trace into protein_Fig2E
Sample								M0pyruvate Results		M1pyruvate Results		M2pyruvate Results		M3pyruvate Results		M0 lactate Results		M1 lactate Results		M2 lactate Results		M3 lactate Results		M0glycolicacid Results		M1glycolicacid Results		M2glycolic Results		M0alanine Results		M1alanine Results		M2alanine Results		M3alanine Results		Glycine Results		M0BHB Results		M1BHB Results		M2BHB Results		M3BHB Results		M4BHB Results
		Name	Sampling Time	Data File	Type	Level	Acq. Date-Time	RT	Area	RT	Area	RT	Area	RT	Area	RT	Area	RT	Area	RT	Area	RT	Area	RT	Area	RT	Area	RT	Area	RT	Area	RT	Area	RT	Area	RT	Area	RT	Area	RT	Area	RT	Area	RT	Area	RT	Area	RT	Area
		UnlabledPro1		UnlabledPro1.D	Sample		2019-06-20 00:37:37	9.1922	558206	9.1922	105469	9.1922	41428.9	9.1922	4341.97	13.5635	2.91209e+06	13.5635	648965	13.666	80778.9	13.6733	23787.4	13.8417	1.14088e+06	13.8417	240678	13.8417	106802	14.3835	3.59209e+07	14.3909	1.09592e+07	14.3909	4.57067e+06	14.3835	698185	14.7643	3.74497e+07	14.3909	1.0574e+07	14.3909	4.40988e+06	14.3909	636673	14.3909	107540	15.3574	4223.92
		UnlabledPro2		UnlabledPro2.D	Sample		2019-06-20 01:20:19	9.1628	552487	9.73393	37851.1	9.71197	9016.19	9.17013	4203.95	13.5634	4.15798e+06	13.5634	932710	13.6659	79327.7	13.6659	23065.5	13.8416	1.08271e+06	13.8416	234548	13.8416	101052	14.3834	3.4302e+07	14.3908	1.01166e+07	14.3834	4.21919e+06	14.3834	645819	14.7516	3.40361e+07	14.3834	9.76987e+06	14.3834	4.0424e+06	14.3834	593670	14.3834	97883.9	15.3499	2832.07
		UnlabledPro3		UnlabledPro3.D	Sample		2019-06-20 02:03:11	9.15548	557529	9.71195	35494.6	9.15548	40339.6	9.14815	4442.83	13.5633	2.84029e+06	13.556	637673	13.6659	82745.3	13.6659	23294	13.8416	1.1622e+06	13.8416	243821	13.8416	106474	14.3834	3.58158e+07	14.3908	1.08806e+07	14.3908	4.54838e+06	14.3908	688071	14.7642	3.84604e+07	14.3908	1.04641e+07	14.3908	4.364e+06	14.3908	639445	14.3908	106916	15.3646	1935.17
		13CProline-1min-1		13CProline-1min-1.D	Sample		2019-06-20 02:46:01	9.11173	328291	9.7341	66060.5	9.11173	23184	9.81465	4855.93	13.5635	3.87375e+06	13.5635	868653	13.6661	89968.7	13.6661	25567.6	13.8418	584836	13.8418	127200	13.8418	52205	14.369	2.4203e+07	14.5447	333741	14.369	2.55386e+06	14.5374	32683.5	14.7424	2.41786e+07	14.369	5.98985e+06	14.369	2.46702e+06	14.369	359290	14.3616	59498.5	15.643	6296.79
		13CProline-1min-2		13CProline-1min-2.D	Sample		2019-06-20 03:28:48	9.13363	435592	9.74137	70924	9.74137	11086.4	9.82192	4677.51	13.5562	2.82838e+06	13.5562	636841	13.666	83195.3	13.666	25080.5	13.8417	741801	14.7497	3.50597e+06	13.8417	68461.1	14.3673	2.95113e+07	14.5373	430829	14.3762	3.34077e+06	14.5373	42174.7	14.7432	3.01877e+07	14.3762	7.77278e+06	14.3762	3.19197e+06	14.3762	469288	14.3689	78814.6	15.372	2843.27
		13CProline-1min-3		13CProline-1min-3.D	Sample		2019-06-20 04:11:34	9.11897	473642	9.72668	63675.4	9.72668	8921.22	9.11163	3459.74	13.5561	2.41127e+06	13.5561	539550	13.666	78314.7	13.6586	24105	13.8417	719197	14.7496	3.31581e+06	13.8417	67068.8	14.3664	2.8602e+07	14.3689	7.7393e+06	14.3689	3.21629e+06	14.5373	34315	14.7413	2.92894e+07	14.3689	7.4457e+06	14.3762	3.08742e+06	14.3689	445025	14.3689	74453.1	15.6429	5916.76
		13CProline-12hrs-1		13CProline-12hrs-1.D	Sample		2019-06-20 04:54:22	9.10422	323099	9.72658	99018.6	9.71195	13933.3	9.80713	4439.48	13.556	2.57288e+06	13.556	579351	13.6659	78920.4	13.6585	23200.6	13.8416	542378	14.7422	2.85087e+06	13.8416	50803.3	14.3688	2.448e+07	14.5372	322775	14.3614	2.60998e+06	14.5372	32751	14.7422	2.62627e+07	14.3614	6.07439e+06	14.3614	2.50019e+06	14.9179	18875.8	14.3614	63868.7	15.6355	5821.47
		13CProline-12hrs-2		13CProline-12hrs-2.D	Sample		2019-06-20 05:37:04	9.19223	512444	9.19223	93071.3	9.19223	38489.8	9.16295	5712.06	13.5635	3.03295e+06	13.5635	678931	13.6733	74771.2	13.6733	21609.4	13.8491	897408	14.7716	4.65228e+06	13.8417	81965.1	14.3786	3.41295e+07	14.3909	1.00293e+07	14.3909	4.1802e+06	14.3909	633396	14.7643	3.64731e+07	14.3909	9.62239e+06	14.3909	4.00105e+06	14.3836	585035	14.3836	97971.5	15.372	2031.2
		13CProline-12hrs-3		13CProline-12hrs-3.D	Sample		2019-06-20 06:19:51	9.1848	445551	9.1848	82123.4	9.1848	32804.5	9.17747	5152.84	13.5634	3.08893e+06	13.5634	689669	13.6659	84807.3	13.6659	23717	13.8416	740232	14.7569	3.83935e+06	13.8416	67504.2	14.3738	3.07622e+07	14.3761	8.49047e+06	14.3761	3.53477e+06	14.3761	536805	14.7569	3.23312e+07	14.3761	8.25568e+06	14.3834	3.39892e+06	14.3761	495319	14.8374	6224.09	15.6502	6648.54
		13CProline-24hrs-1		13CProline-24hrs-1.D	Sample		2019-06-20 07:02:39	9.17758	452769	9.1849	84083.6	9.1849	34869.5	9.17025	4239.39	13.5635	4.25191e+06	13.5635	953819	13.666	82770.4	13.666	23786.4	13.8417	781146	14.7497	3.53876e+06	13.8417	73182.2	14.3732	2.99084e+07	14.3836	8.18438e+06	14.3762	3.40953e+06	14.3762	519271	14.7478	3.05268e+07	14.3836	7.94368e+06	14.3836	3.27426e+06	14.3762	480707	14.3762	79758.1	15.643	6275.29
		13CProline-24hrs-2		13CProline-24hrs-2.D	Sample		2019-06-20 07:45:27	9.21408	500692	9.20677	92495.7	9.20677	35491.2	9.19945	6038.51	13.5634	3.14331e+06	13.5634	706708	13.6732	79837.8	13.6732	22974.5	13.849	789846	14.7642	4.12196e+06	13.849	73342.7	14.3835	3.31433e+07	14.3908	9.46909e+06	14.3908	3.95165e+06	14.3908	604460	14.7569	3.3866e+07	14.3908	9.11546e+06	14.3908	3.79985e+06	14.3908	553929	14.3835	92597	15.6429	6649.95
		13CProline-24hrs-3		13CProline-24hrs-3.D	Sample		2019-06-20 08:28:11	9.22887	515429	9.22887	92927.8	9.22153	37817.4	9.22887	3695.05	13.5708	3.1142e+06	13.5708	700797	13.6733	85365.7	13.666	24485.7	13.8491	988931	14.7716	4.34707e+06	13.8491	94033.5	14.3909	3.43145e+07	14.3909	9.81235e+06	14.3909	4.10455e+06	14.3909	630943	14.7643	3.53322e+07	14.3909	9.57072e+06	14.3909	3.99493e+06	14.3909	580645	14.3836	98180.4	15.3794	1970.49
		13CProline-72hrs-1		13CProline-72hrs-1.D	Sample		2019-06-20 09:11:00	9.9096	5884.41	10.305	944.585					14.42	8104.85	14.4127	4327.85	14.42	224.06	12.9263	212.718	14.8227	3770.12	14.7641	133.532	13.6512	360.751	14.4127	55406.3	14.42	12159.5	14.4127	4327.85	14.42	224.06	14.8227	24462.7	14.4054	13159.5	14.5079	339.624	14.442	154.626
		13CProline-72hrs-2		13CProline-72hrs-2.D	Sample		2019-06-20 09:53:45	9.2215	495948	9.2215	93751.3	9.2215	35442.7	9.2215	3789.42	13.5708	3.42866e+06	13.5635	775657	13.6733	87086.6	13.6733	23940.4	13.8491	994965	14.7643	4.36248e+06	13.8491	91735.1	14.3819	3.41949e+07	14.3909	9.72012e+06	14.3909	4.0605e+06	14.3909	629097	14.7643	3.5502e+07	14.3909	9.43979e+06	14.3909	3.92869e+06	14.3909	570434	14.3836	99145.3	15.6503	7211.98
		13CProline-72hrs-3		13CProline-72hrs-3.D	Sample		2019-06-20 10:36:37	9.22155	485767	9.21423	88882.3	9.2069	37510.9	9.19958	3521.85	13.5709	3.73052e+06	13.5709	842746	13.6734	84519.8	13.6734	24954.6	13.8491	926785	13.8491	202300	13.8491	84508.9	14.3812	3.26292e+07	14.3909	9.05828e+06	14.3909	3.77833e+06	14.3909	586300	14.7644	3.28393e+07	14.3909	8.79695e+06	14.3909	3.67154e+06	14.3909	531640	15.5551	4851.45	15.5478	4303.27
[truncated: 274 more columns]
