# Supplementary figures and images for: SLC38A2 provides proline to fulfill unique synthetic demands arising during osteoblast differentiation and bone formation
Source: eLife journal article supplement (doi:10.7554/elife.76963), 2022-03-09

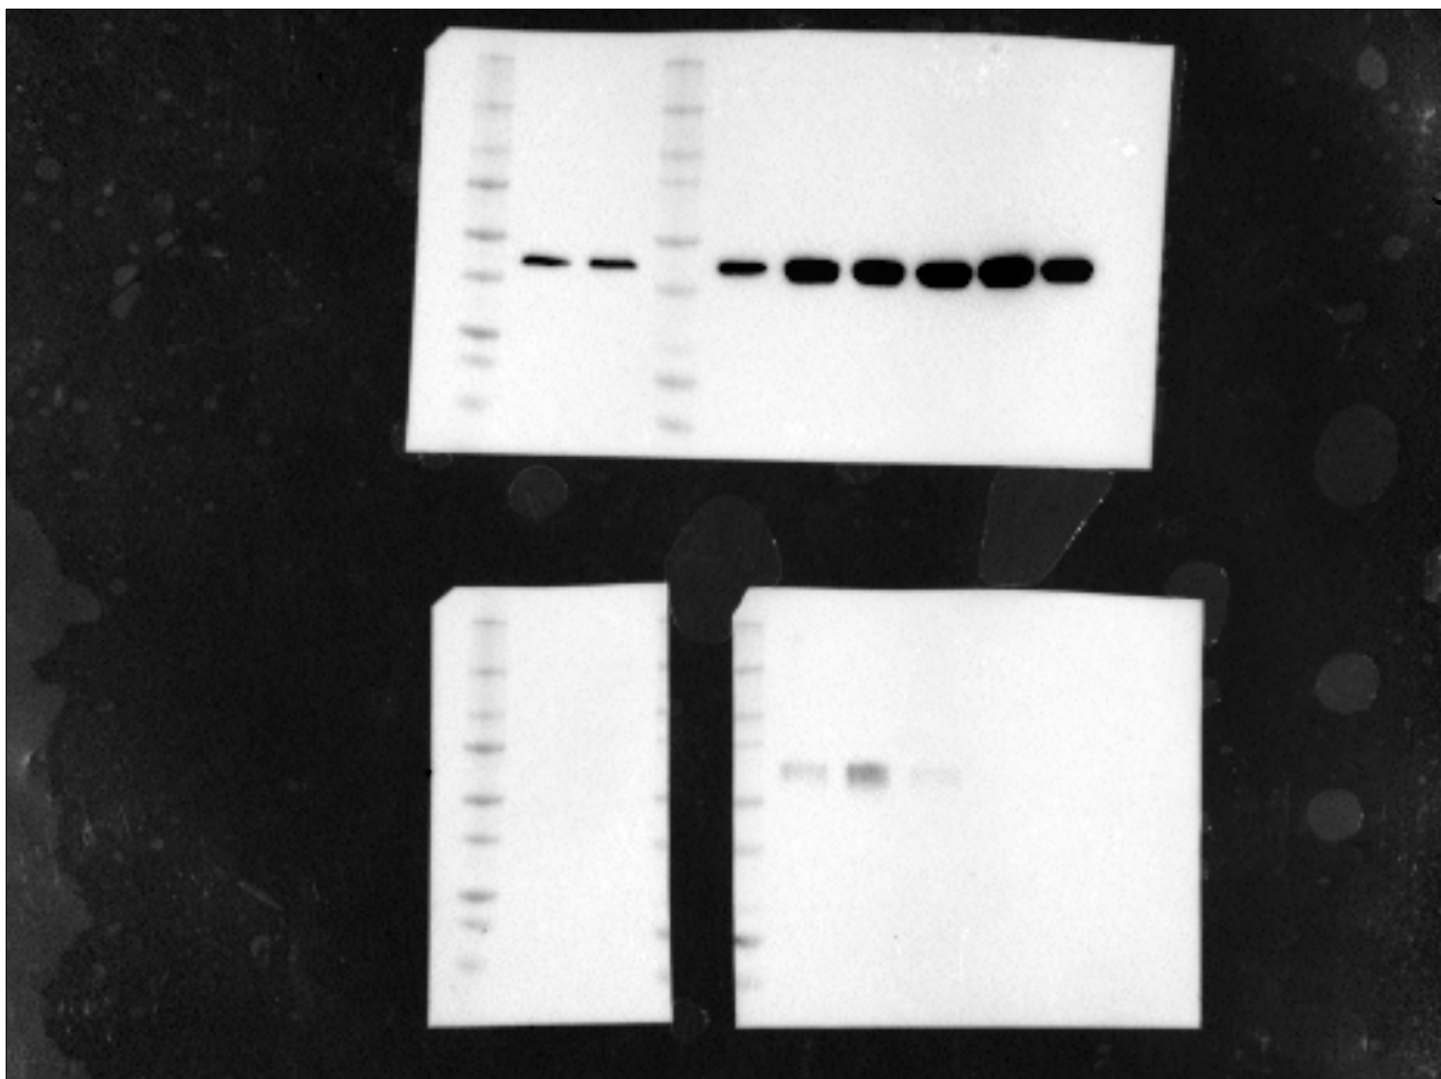

Supplement: supp [file elife-76963-supp-v2.zip]

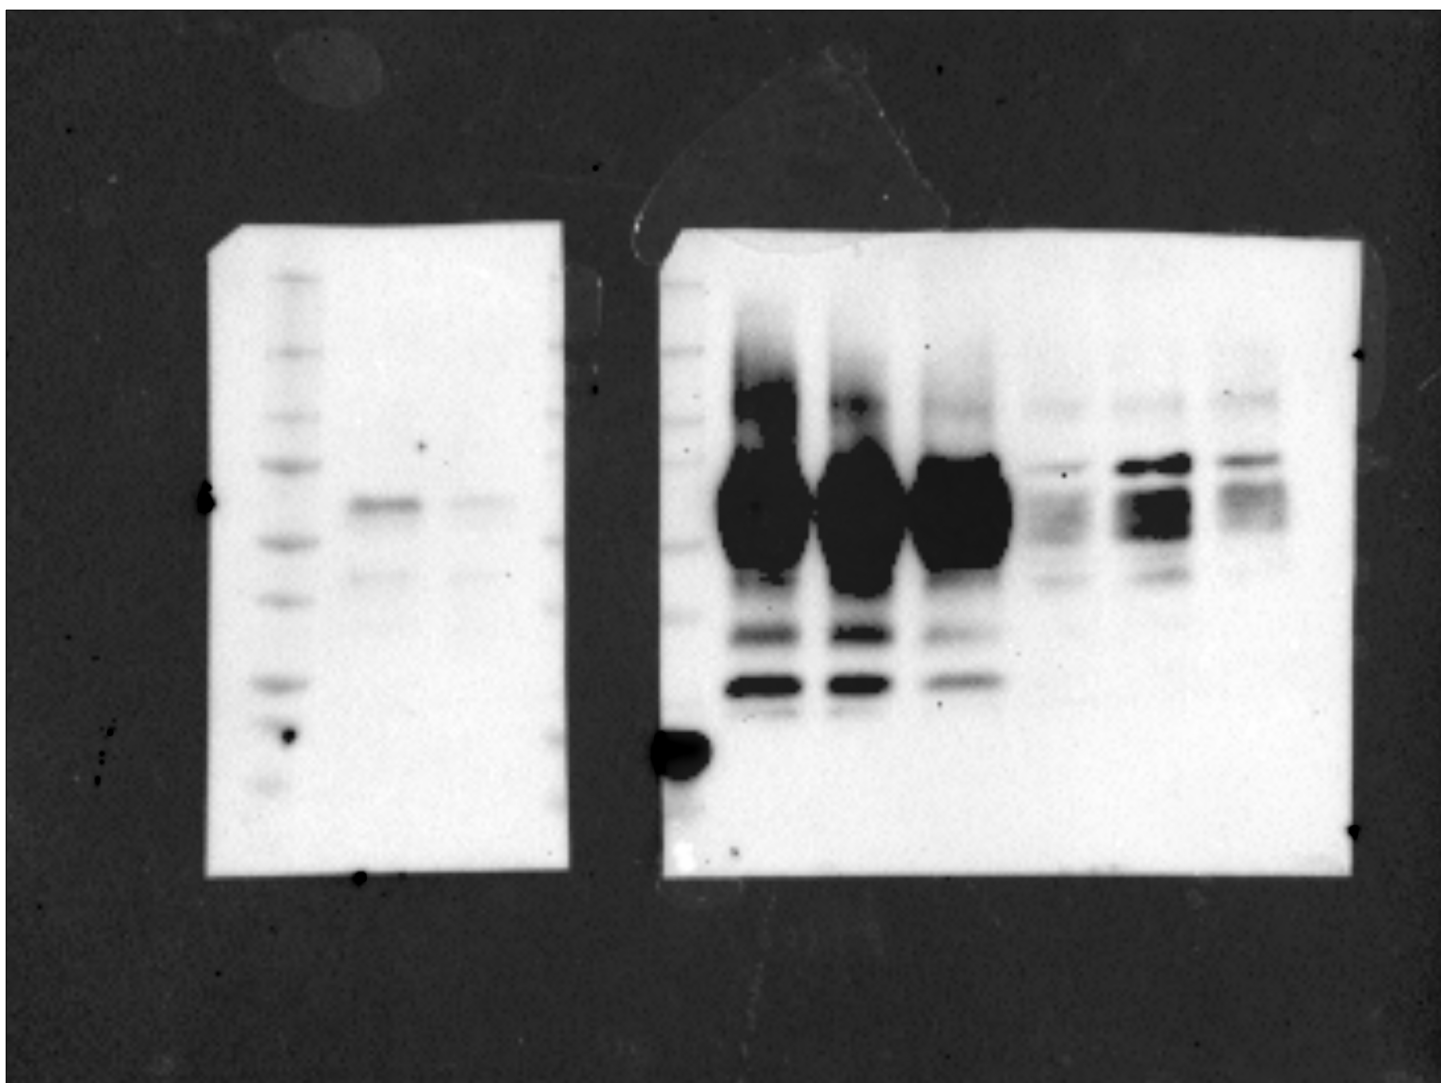

Supplement: supp [file elife-76963-supp-v2.zip]
